# Supplementary material for: A genome scale overexpression screen to reveal drug activity in human cells
Source: PubMed Central journal article supplement (PMC4062067; doi:10.1186/gm549), 2014-04-29

HEK293\_4-Nitroquinoline  
EV

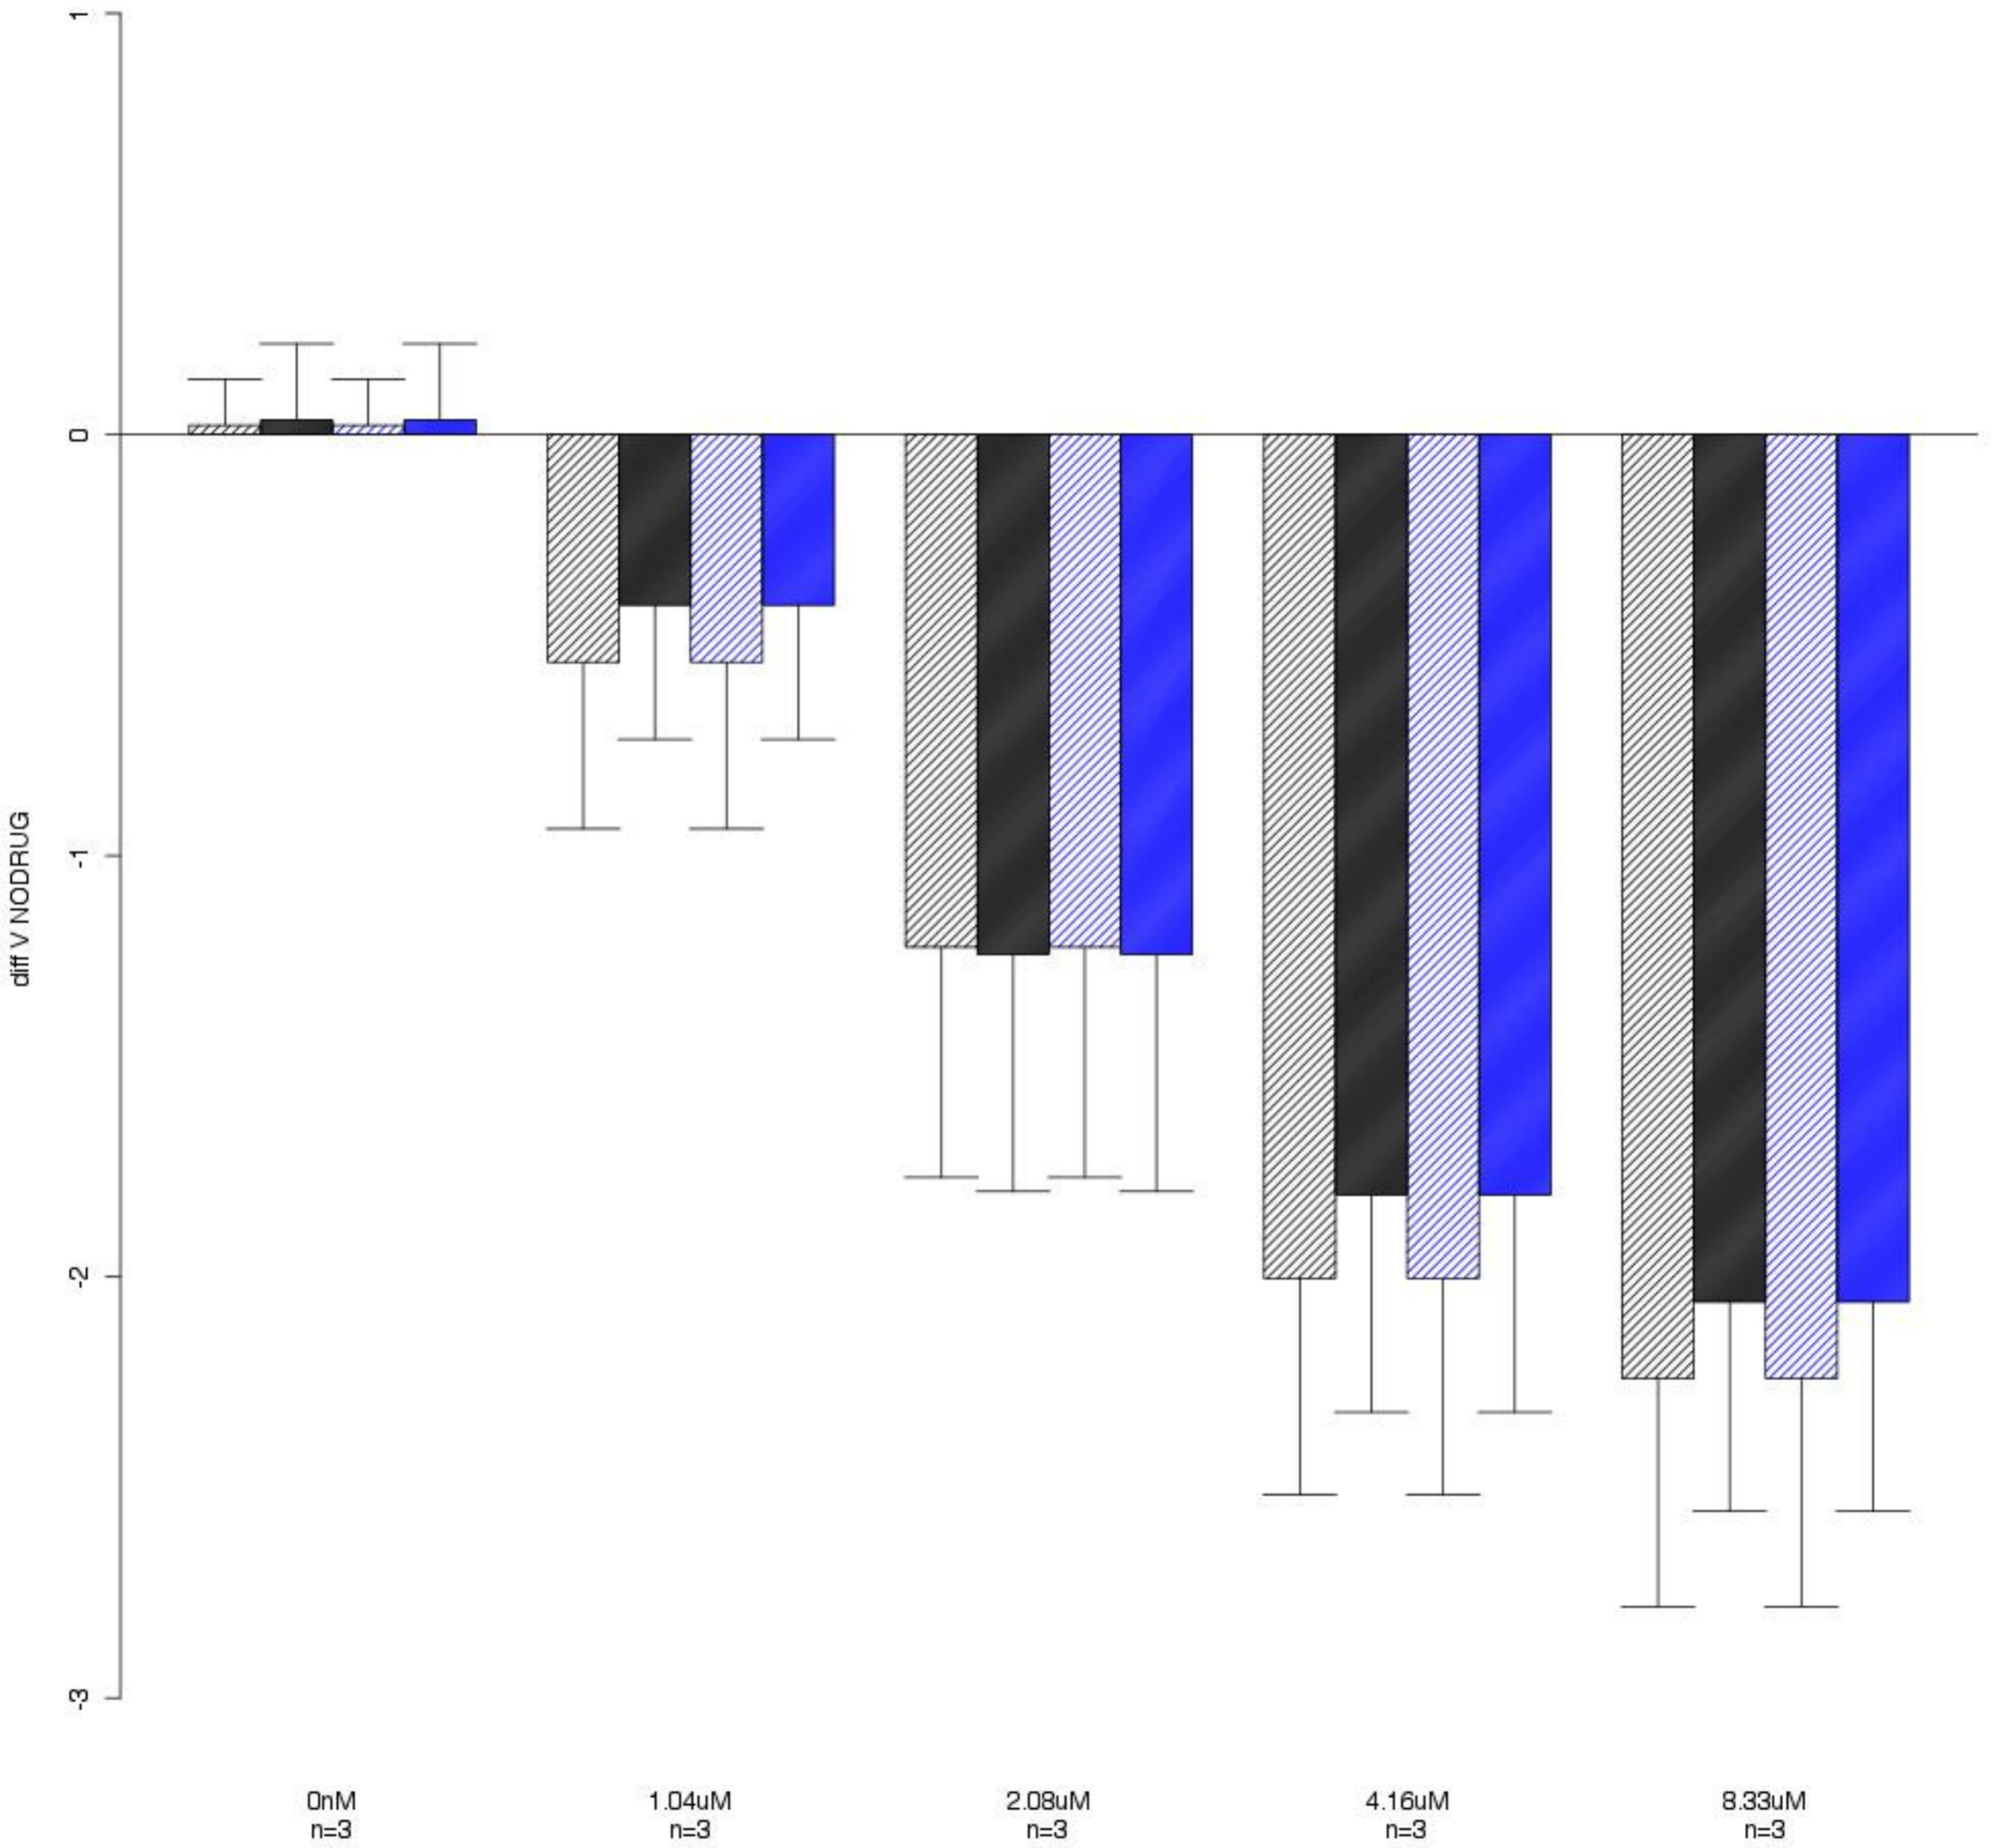

HEK293\_4-Nitroquinoline  
RHOXF2

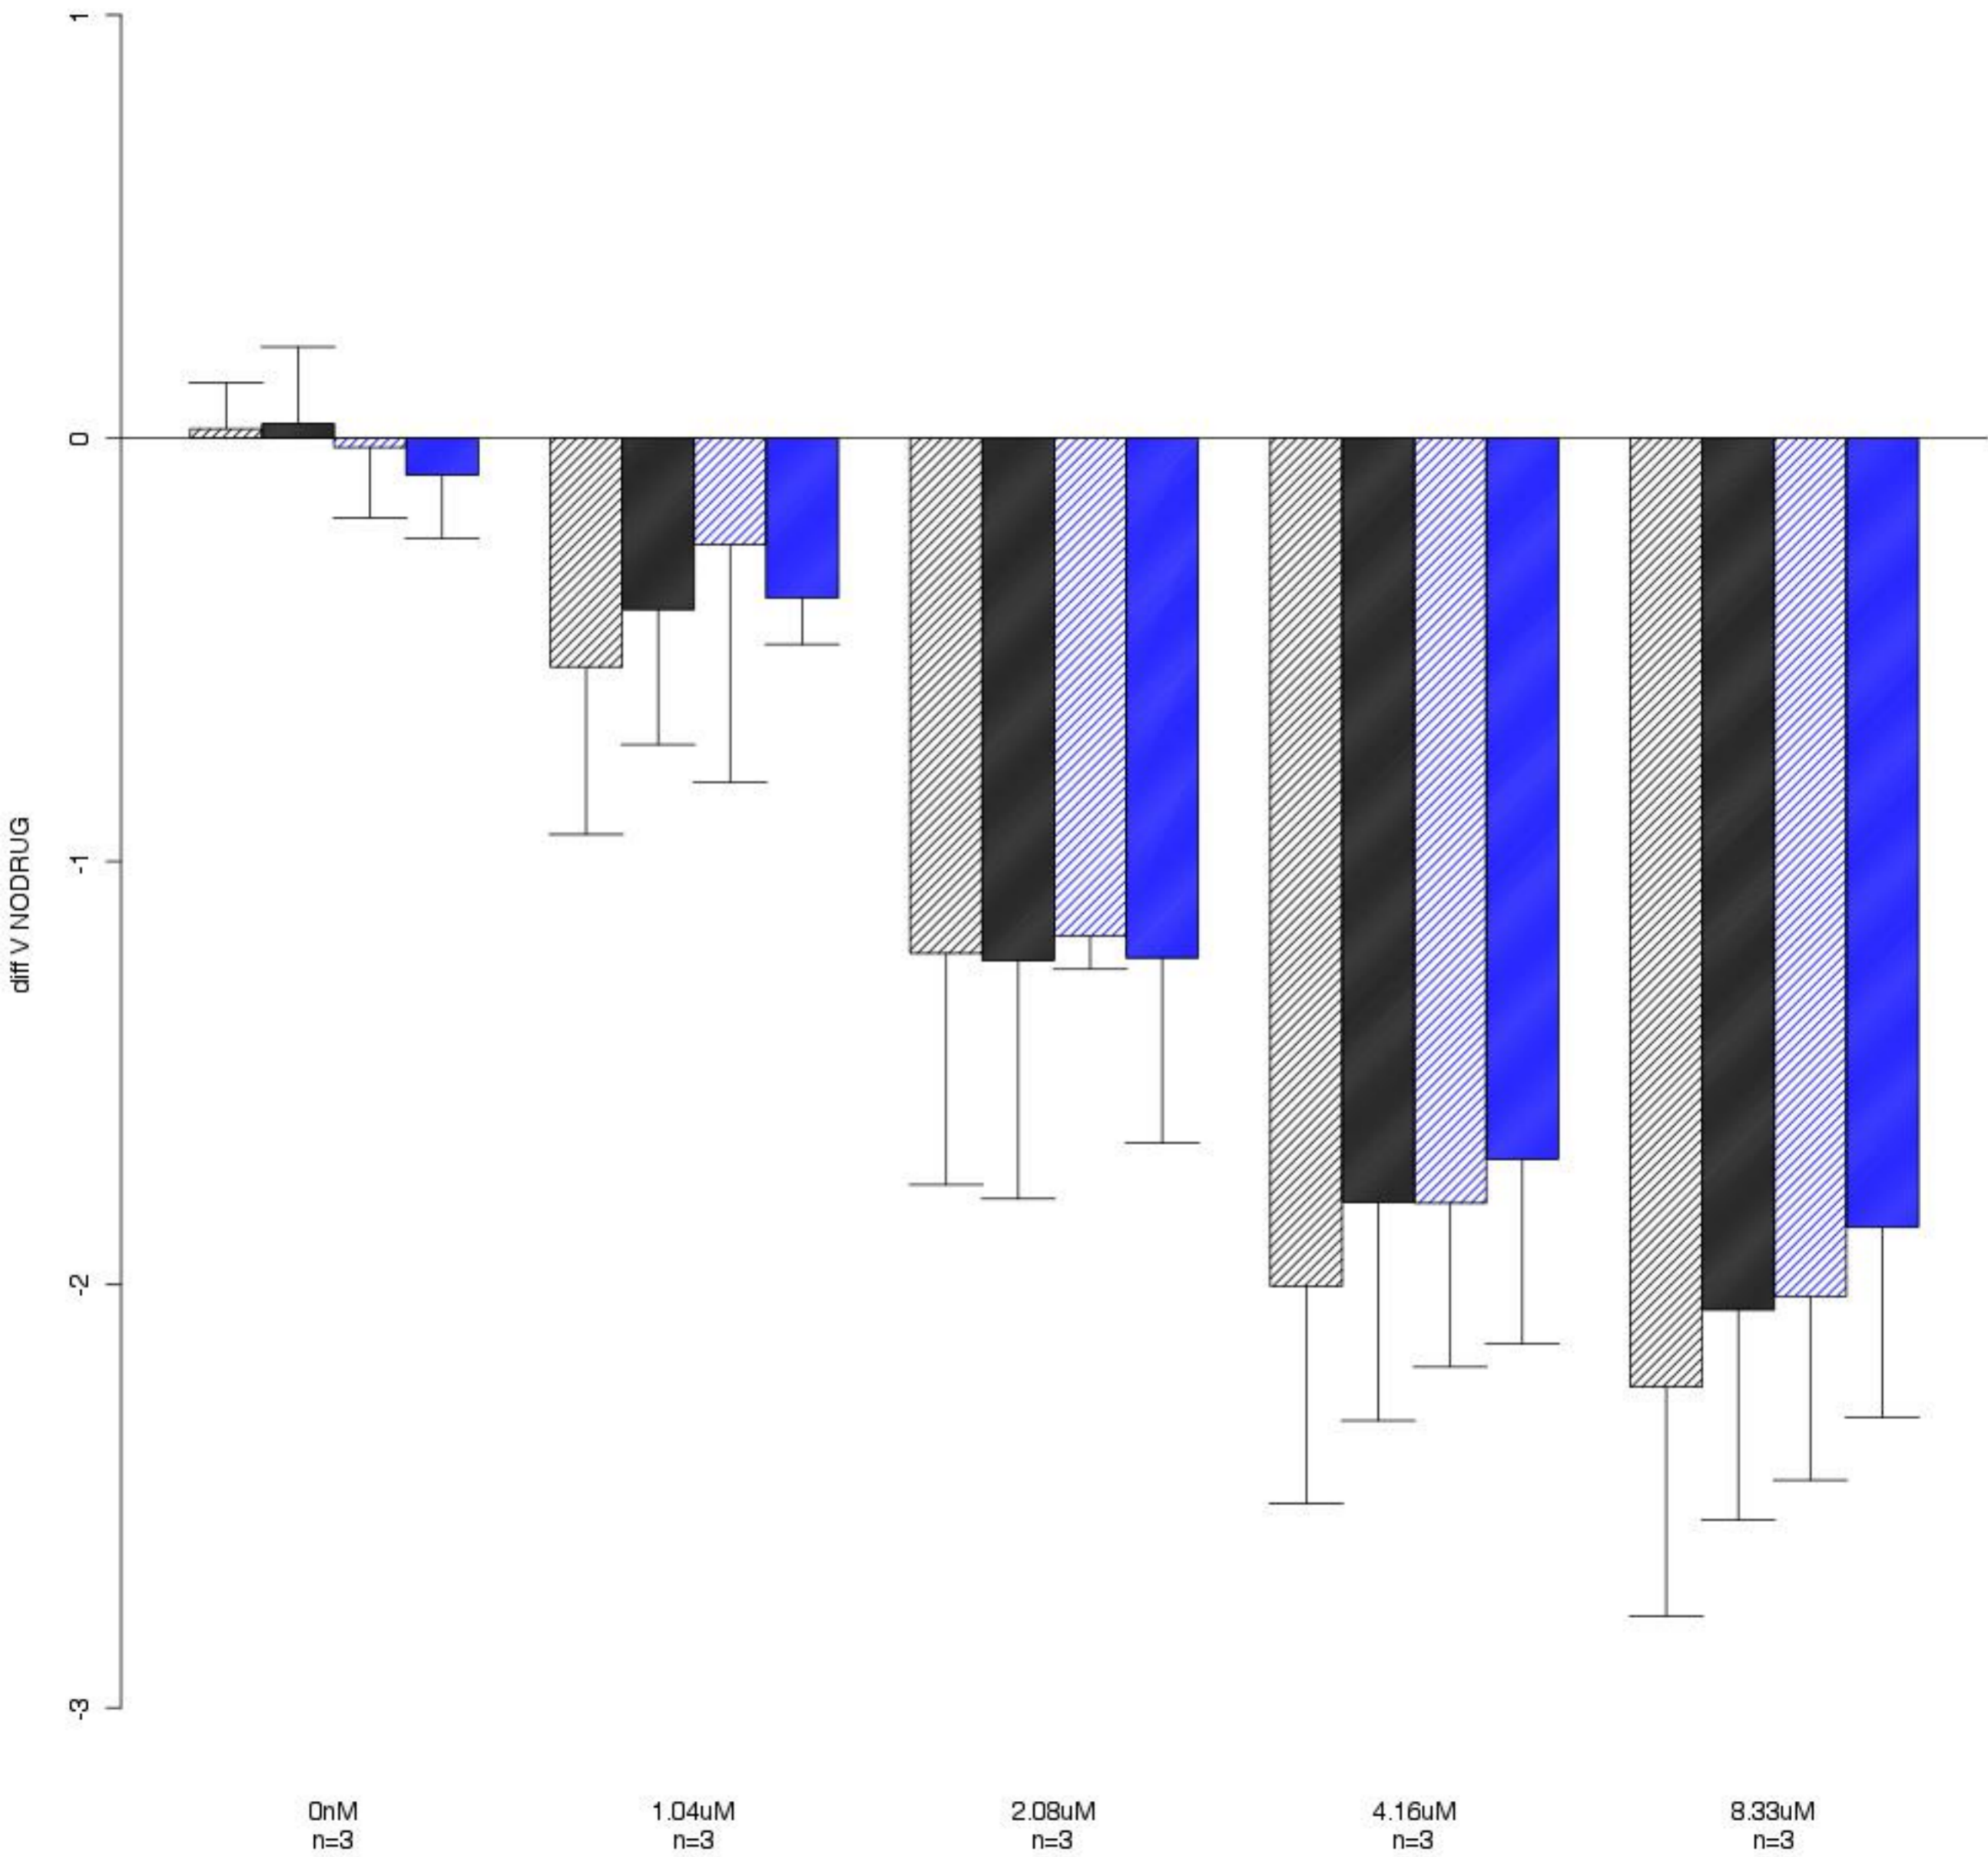

HEK293\_5-fluorouracil  
EV

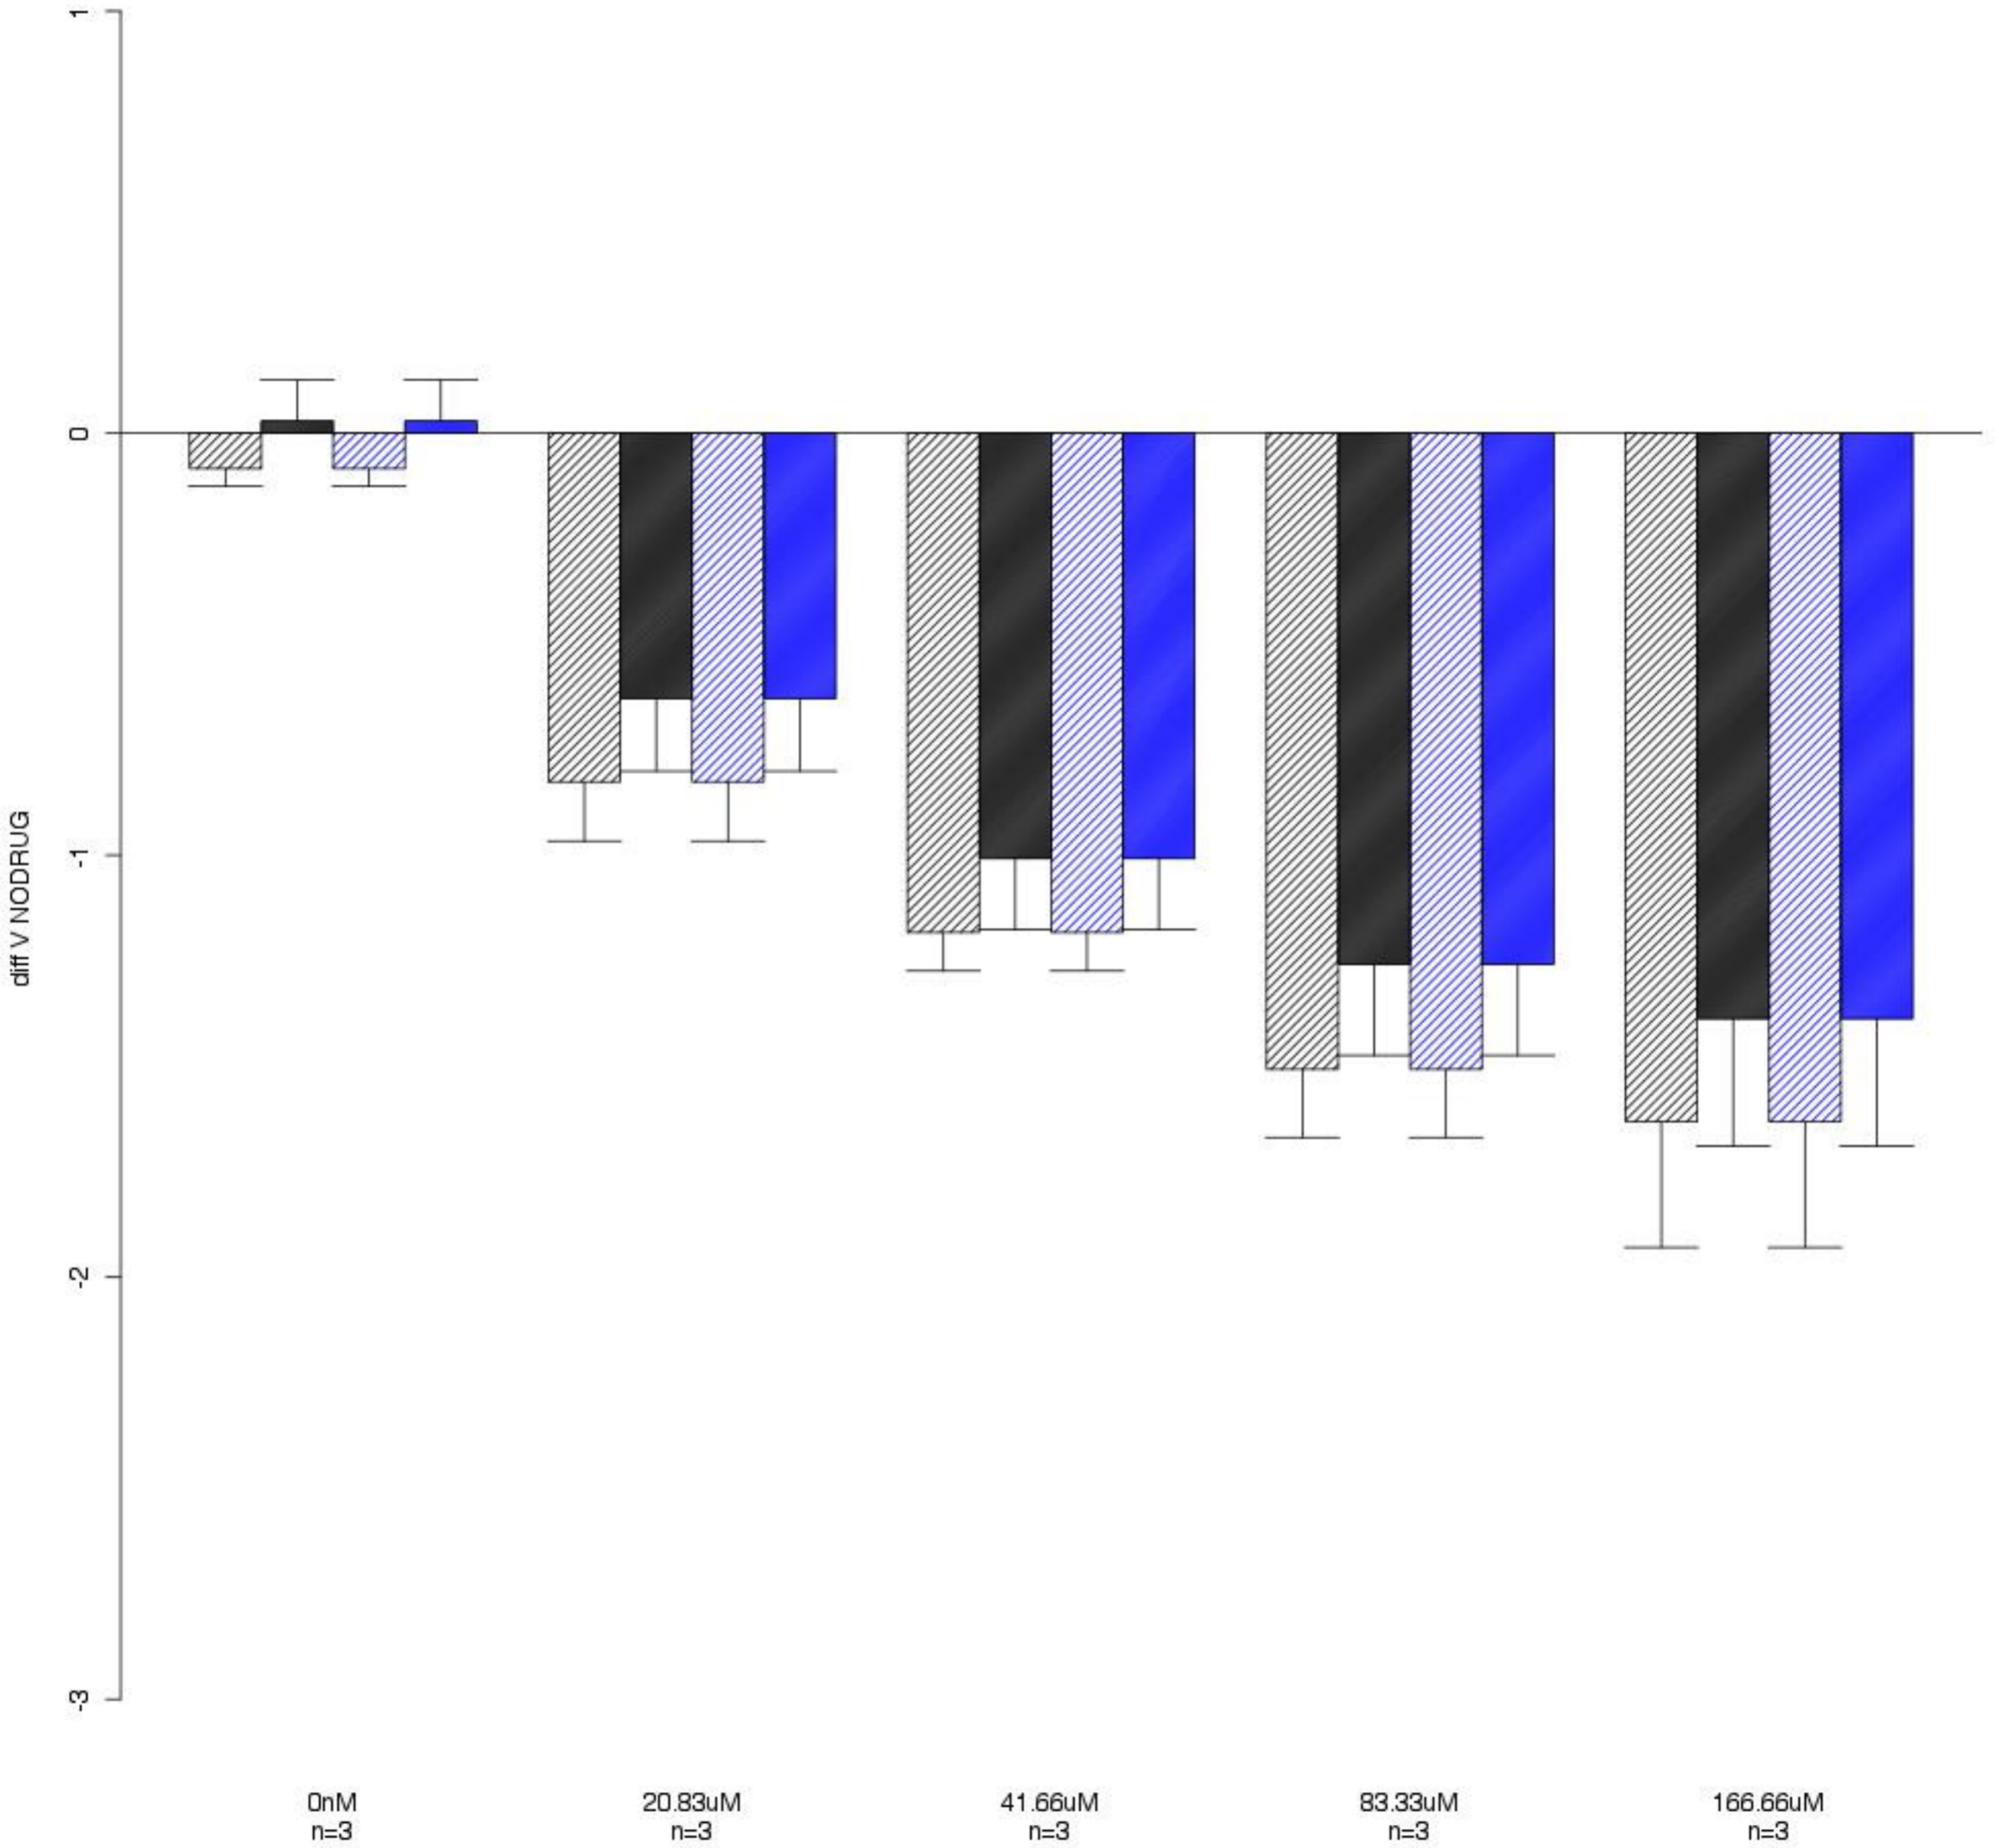

HEK293\_5-fluorouracil  
RHOXF2

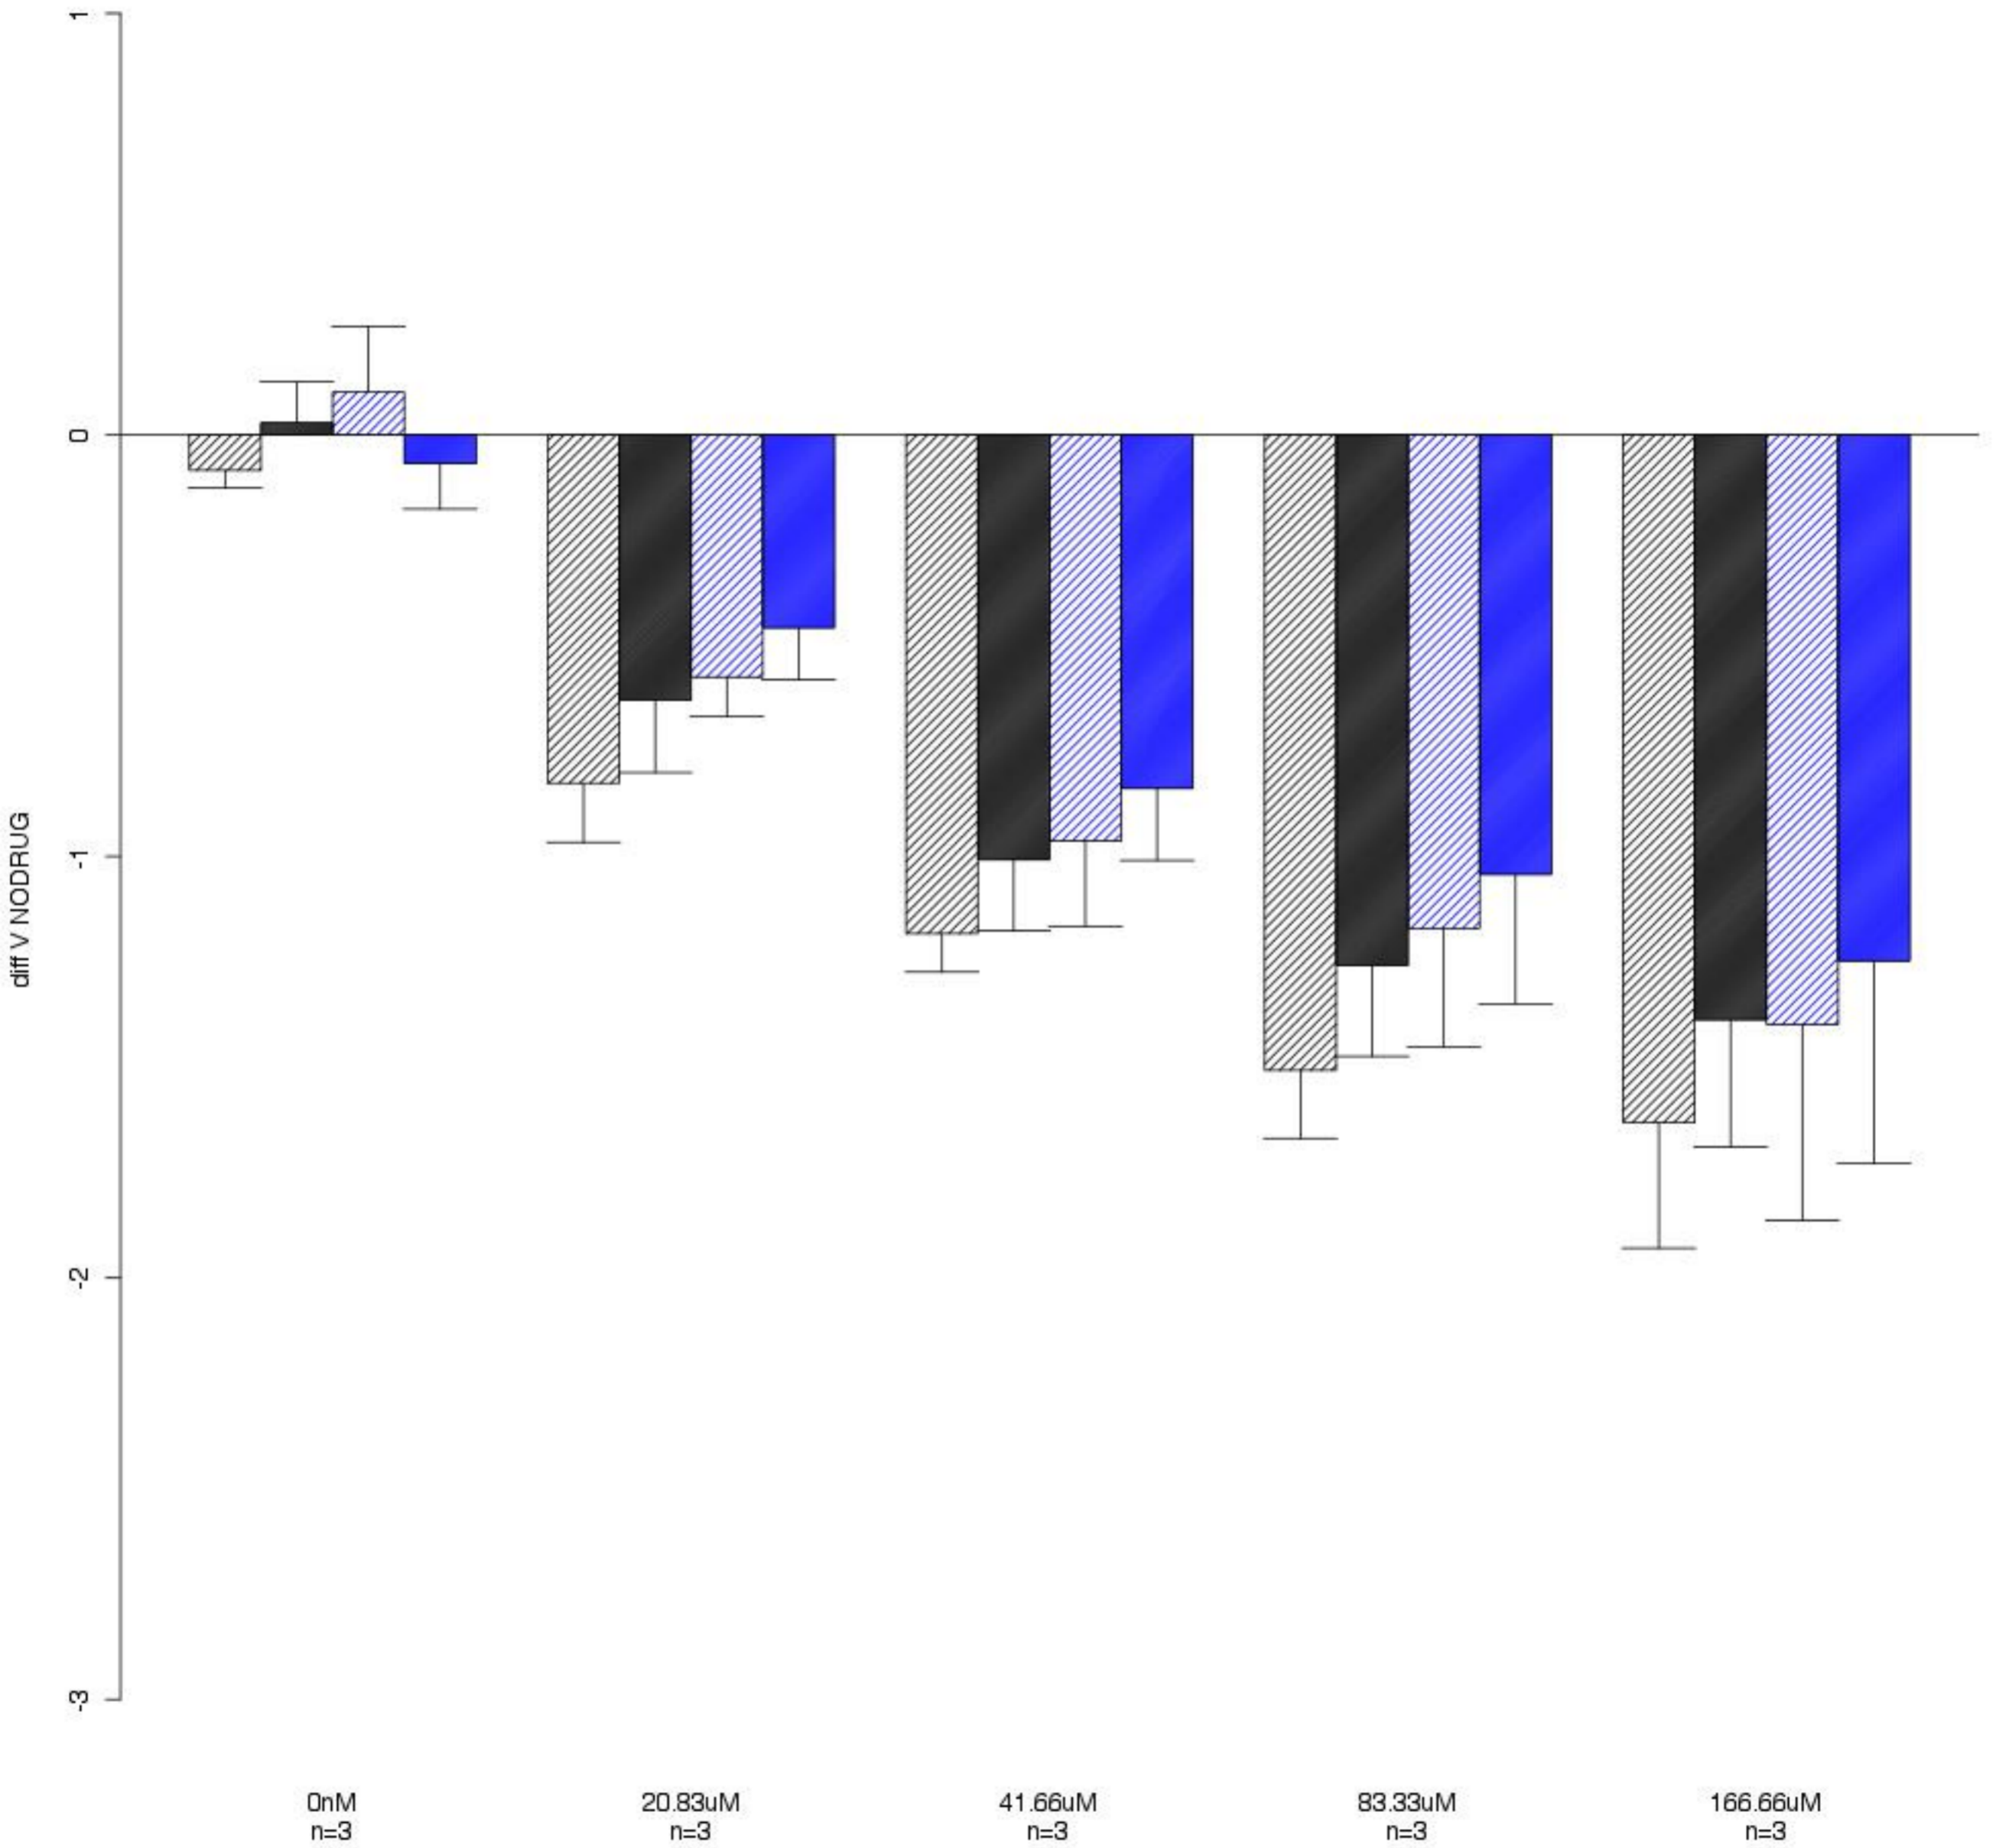

HEK293\_Bleomycin  
EV

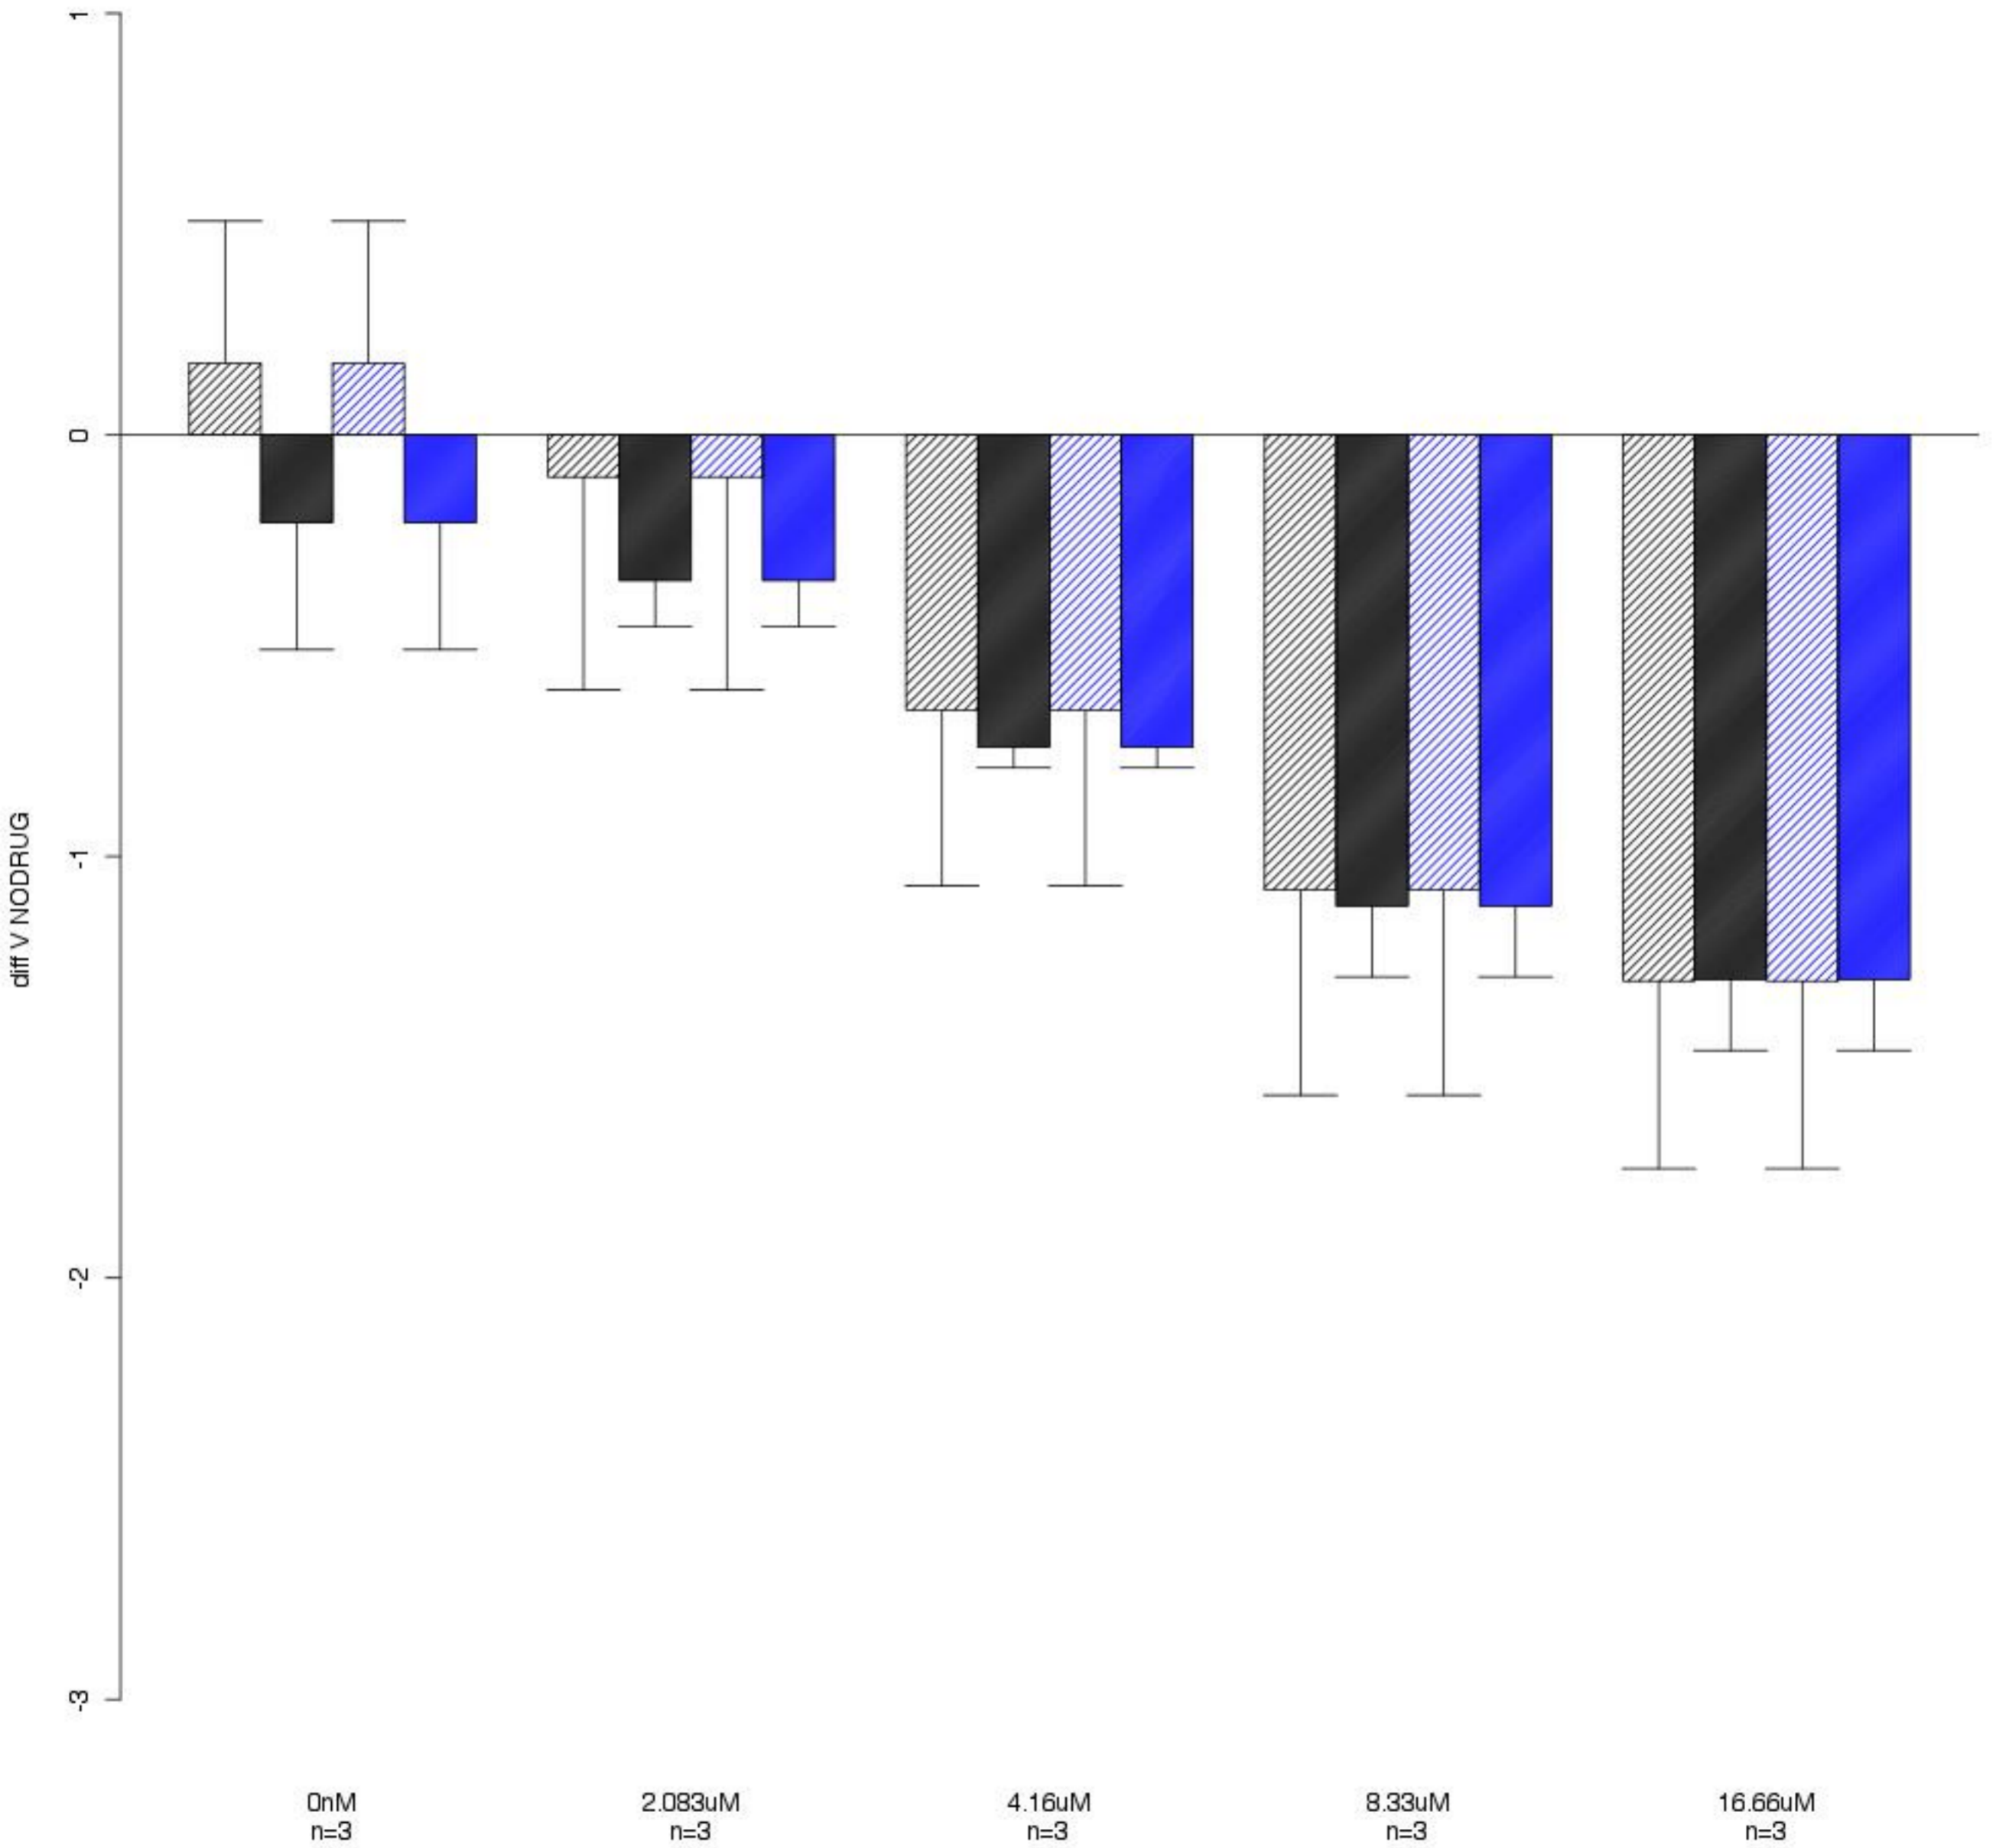

HEK293\_Bleomycin  
RHOXF2

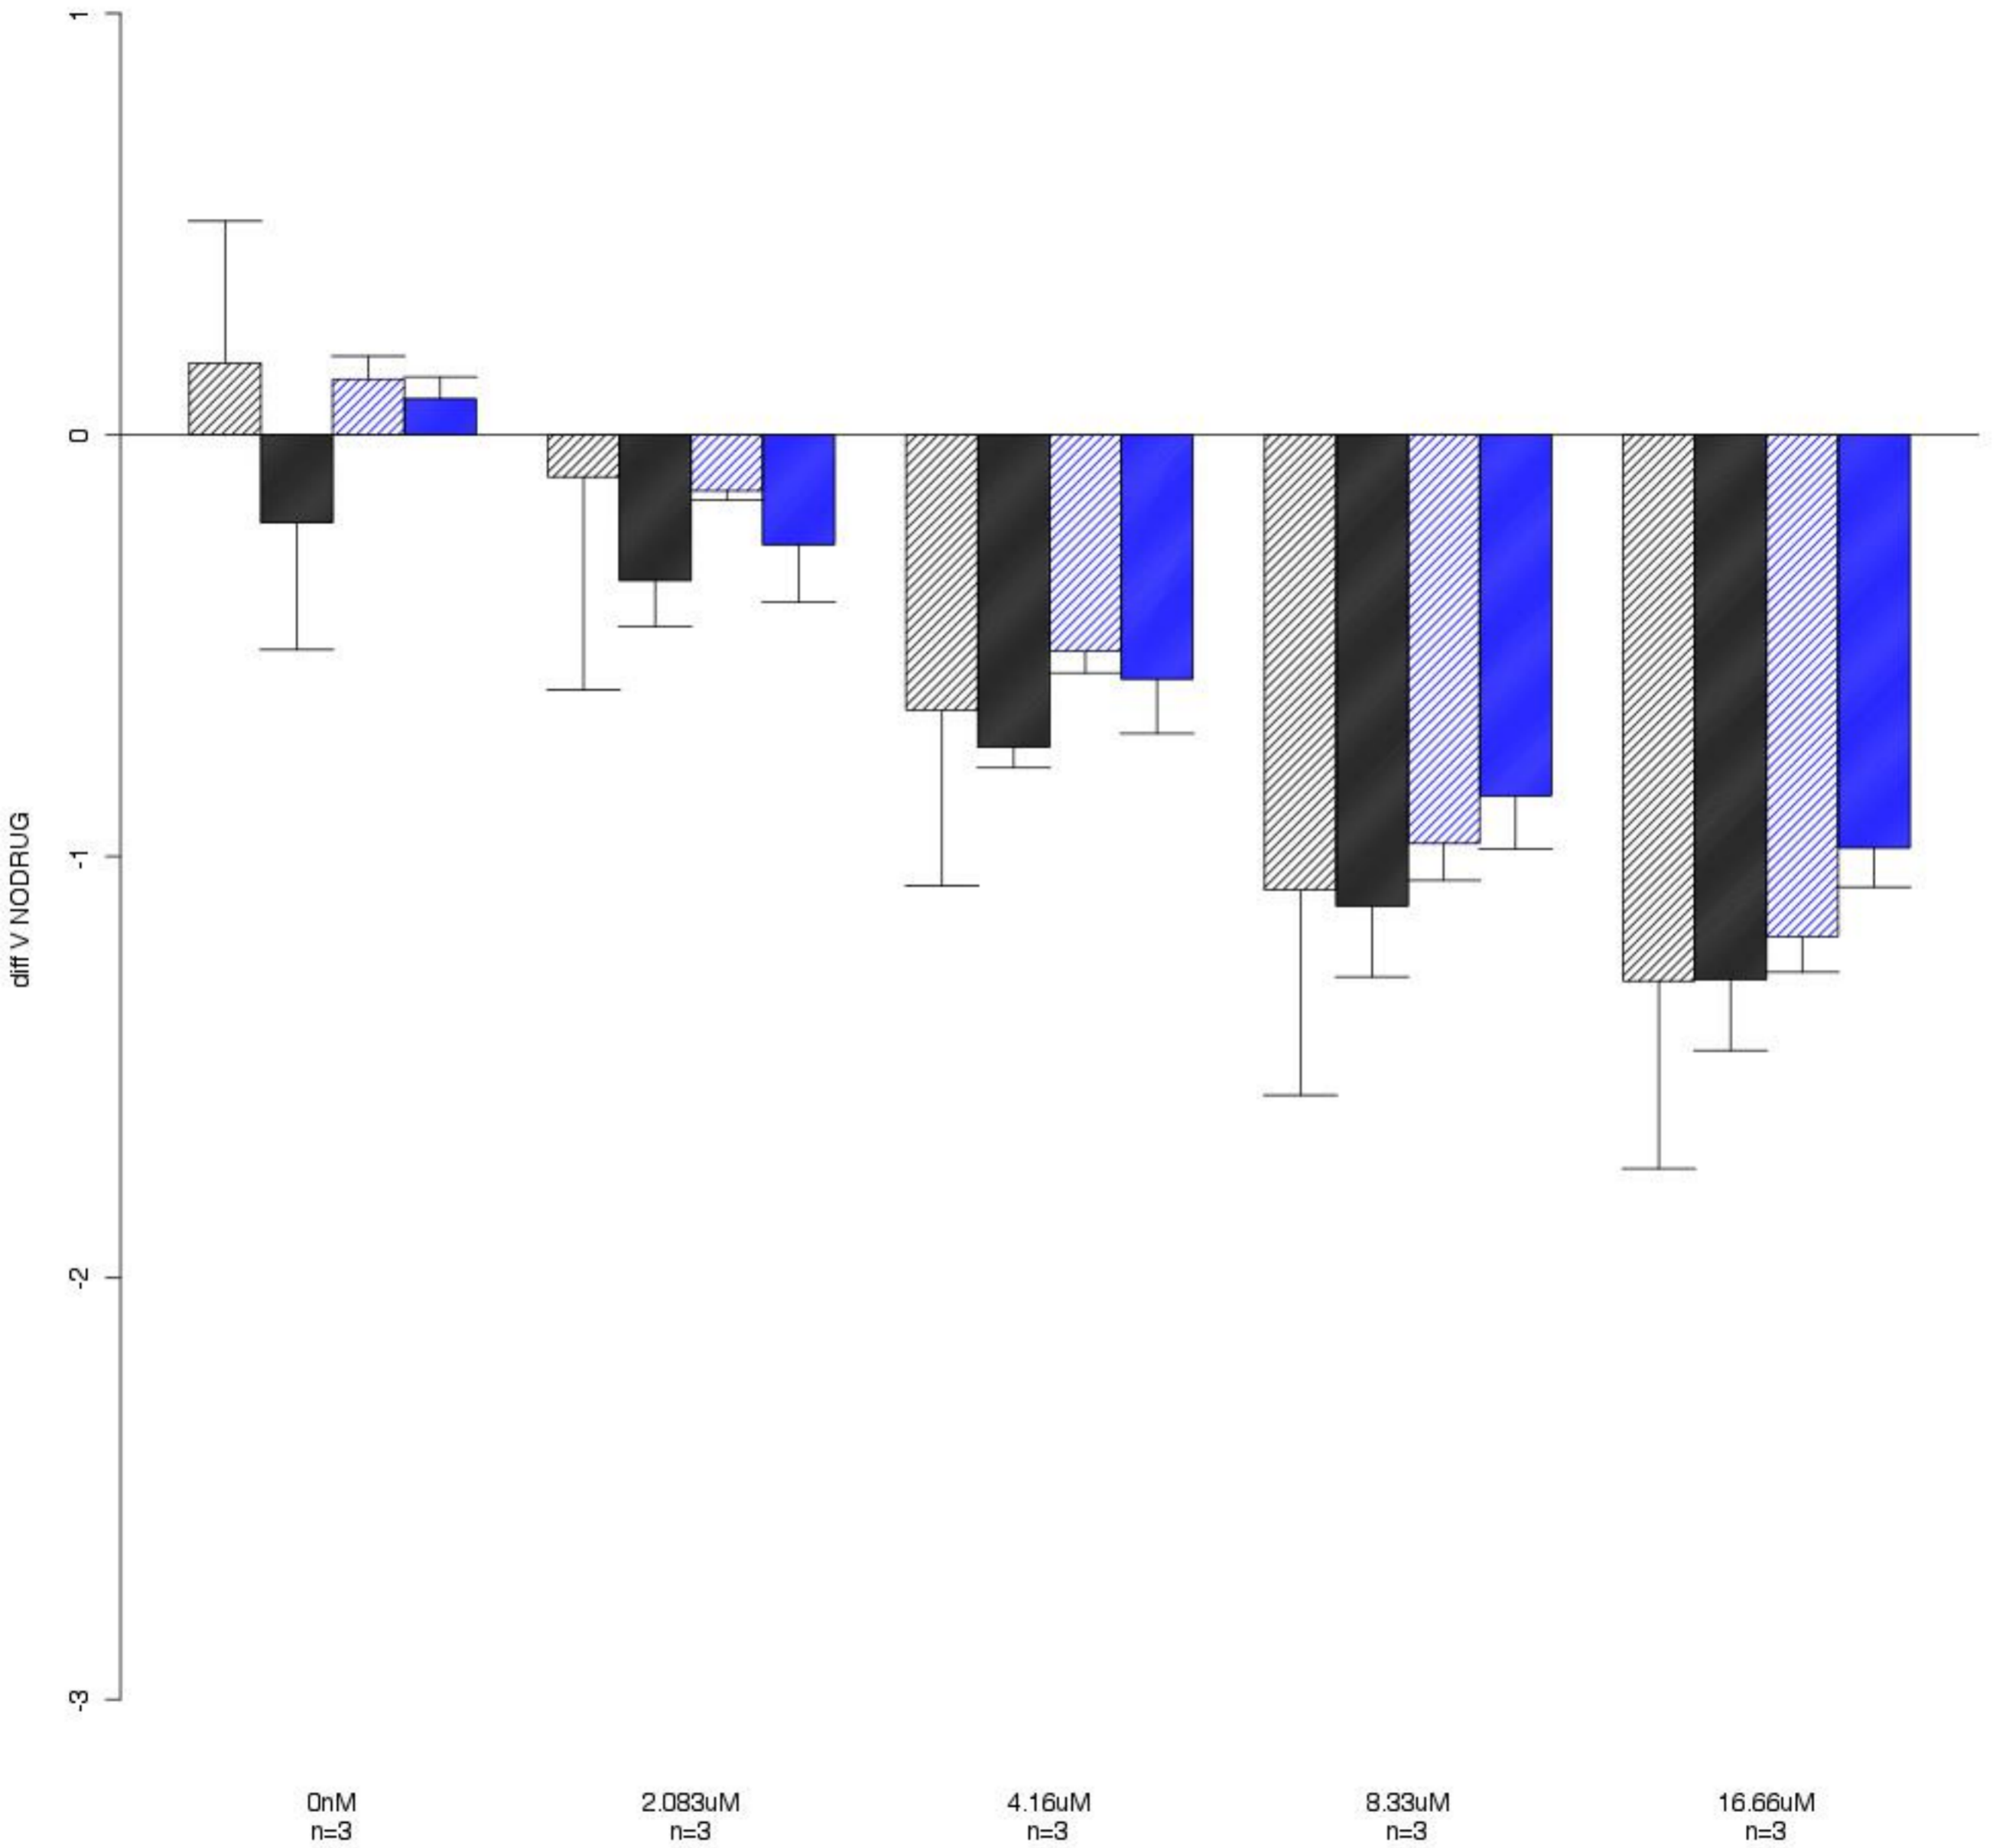

HEK293\_Camptothecin  
EV

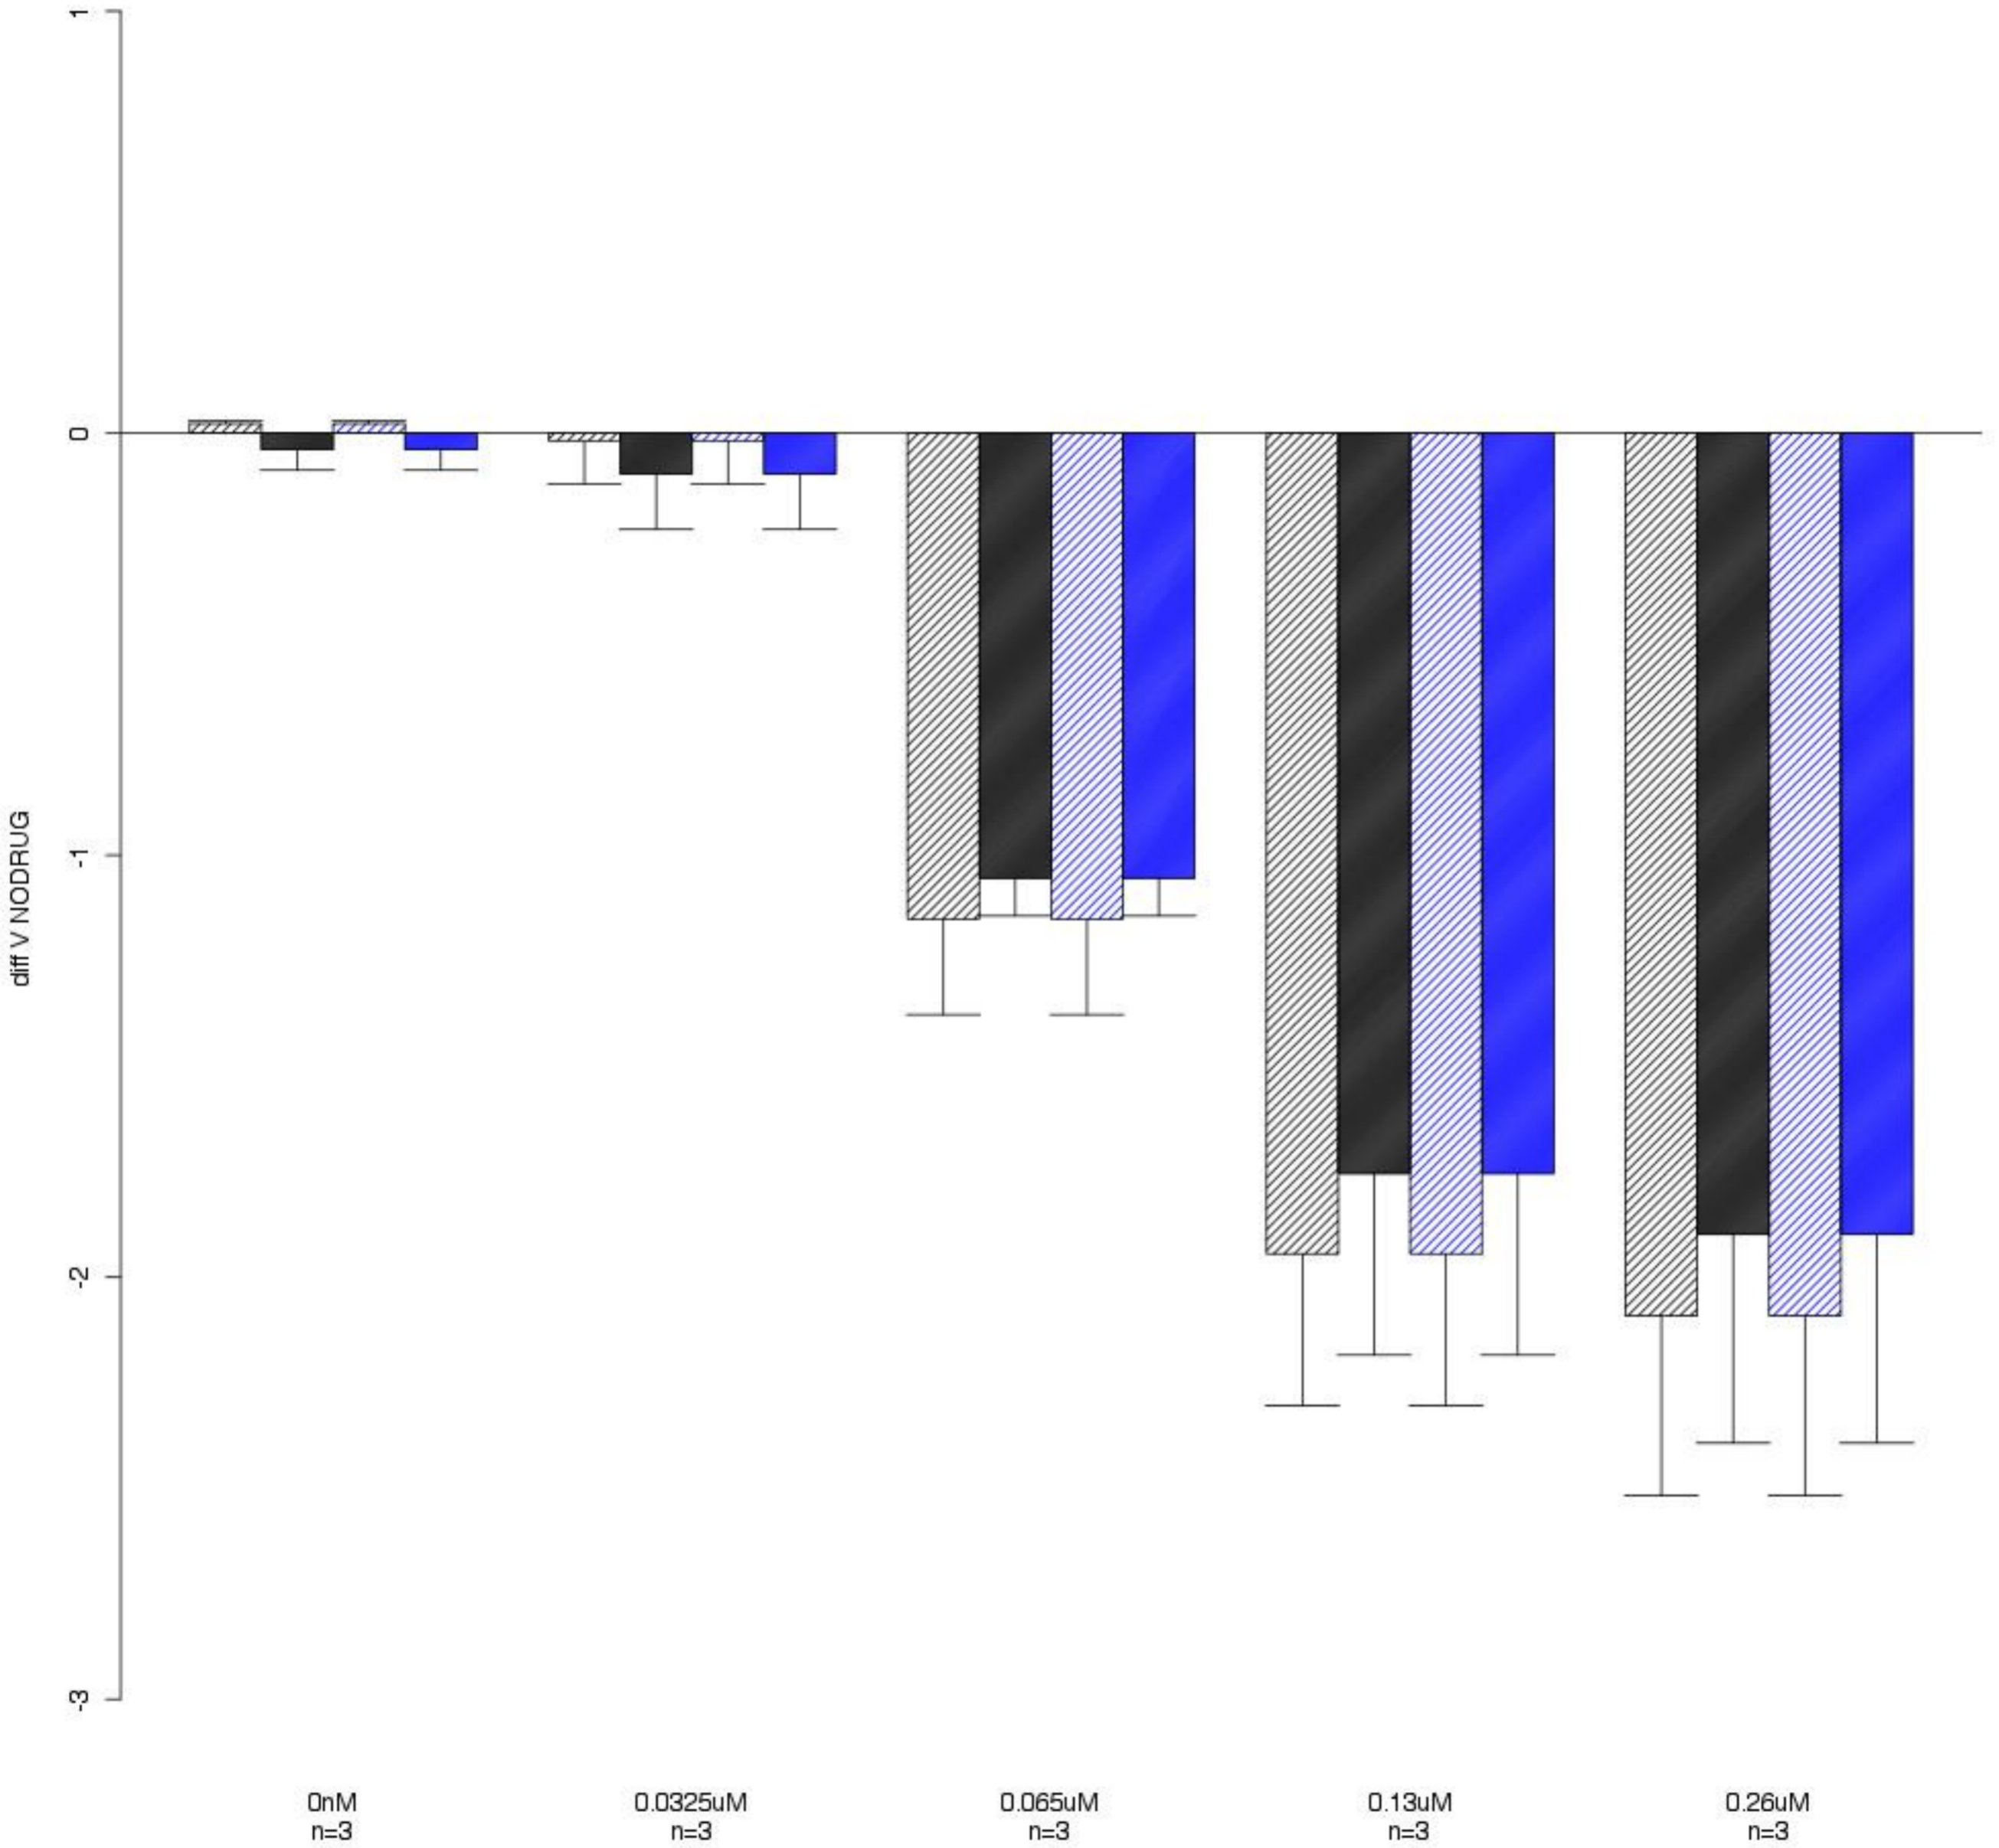

HEK293\_Camptothecin  
RHOXF2

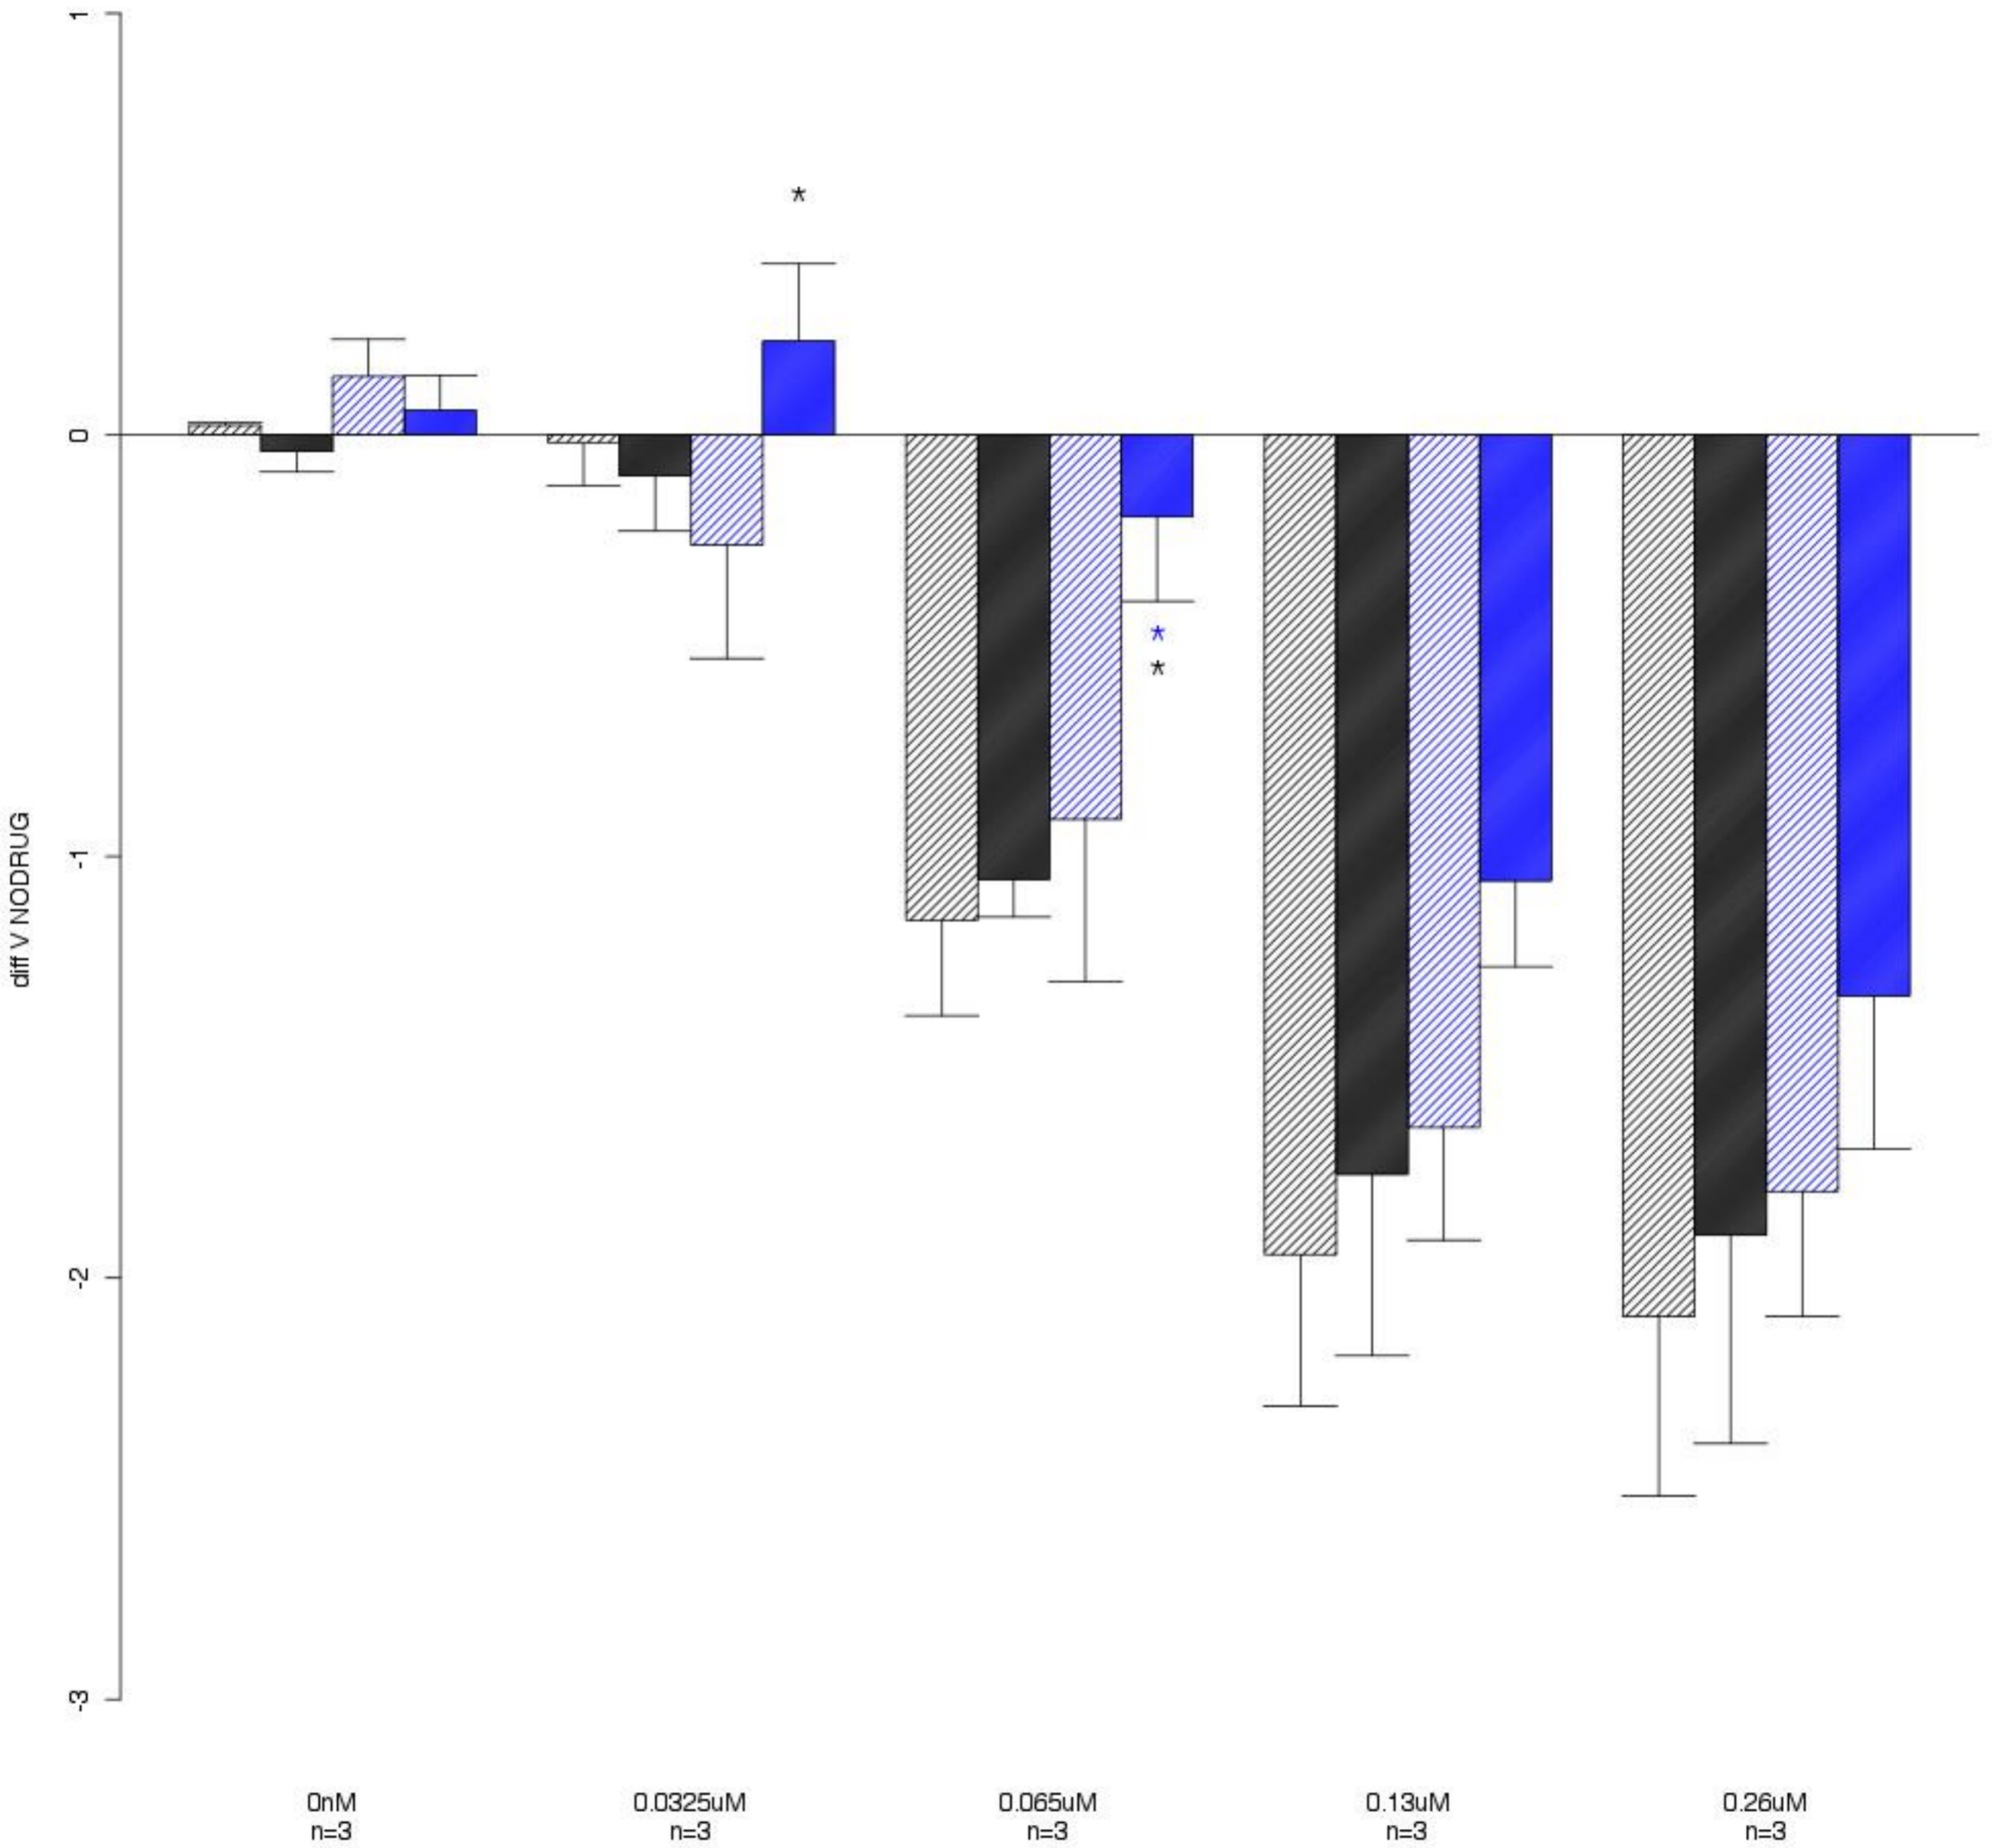



HEK293\_Doxorubicin  
EV

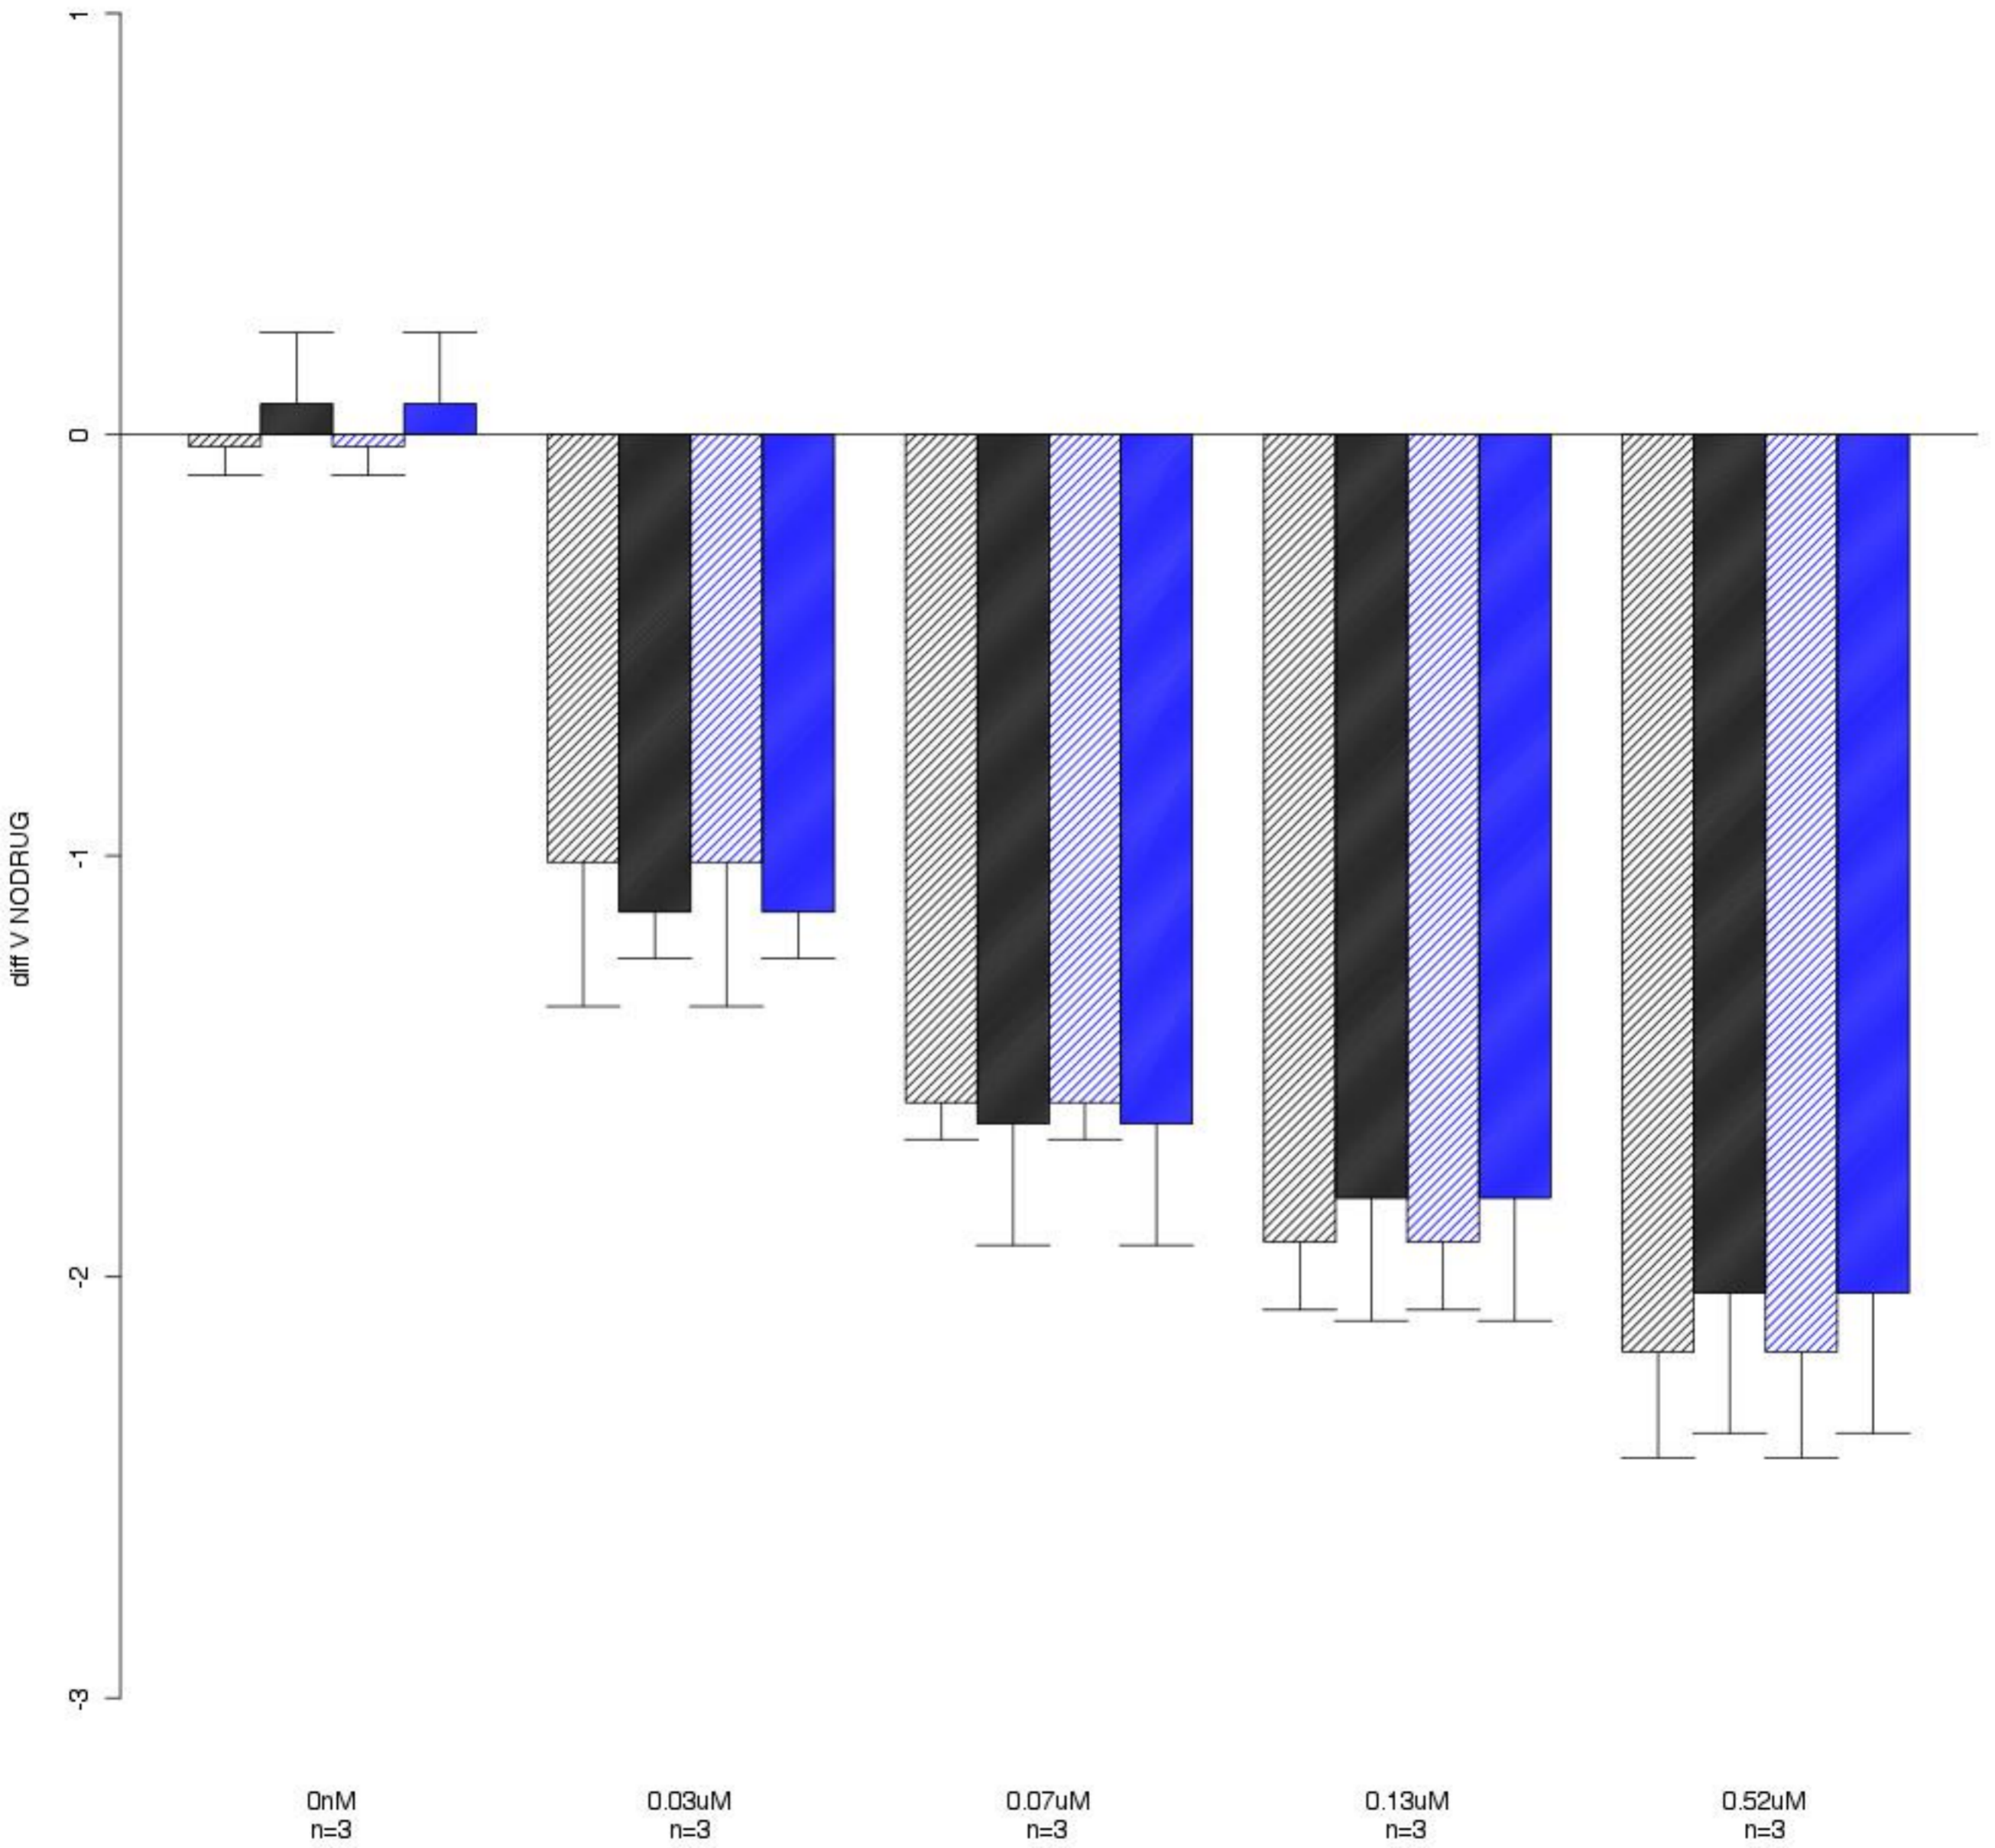

HEK293\_Doxorubicin  
RHOF2

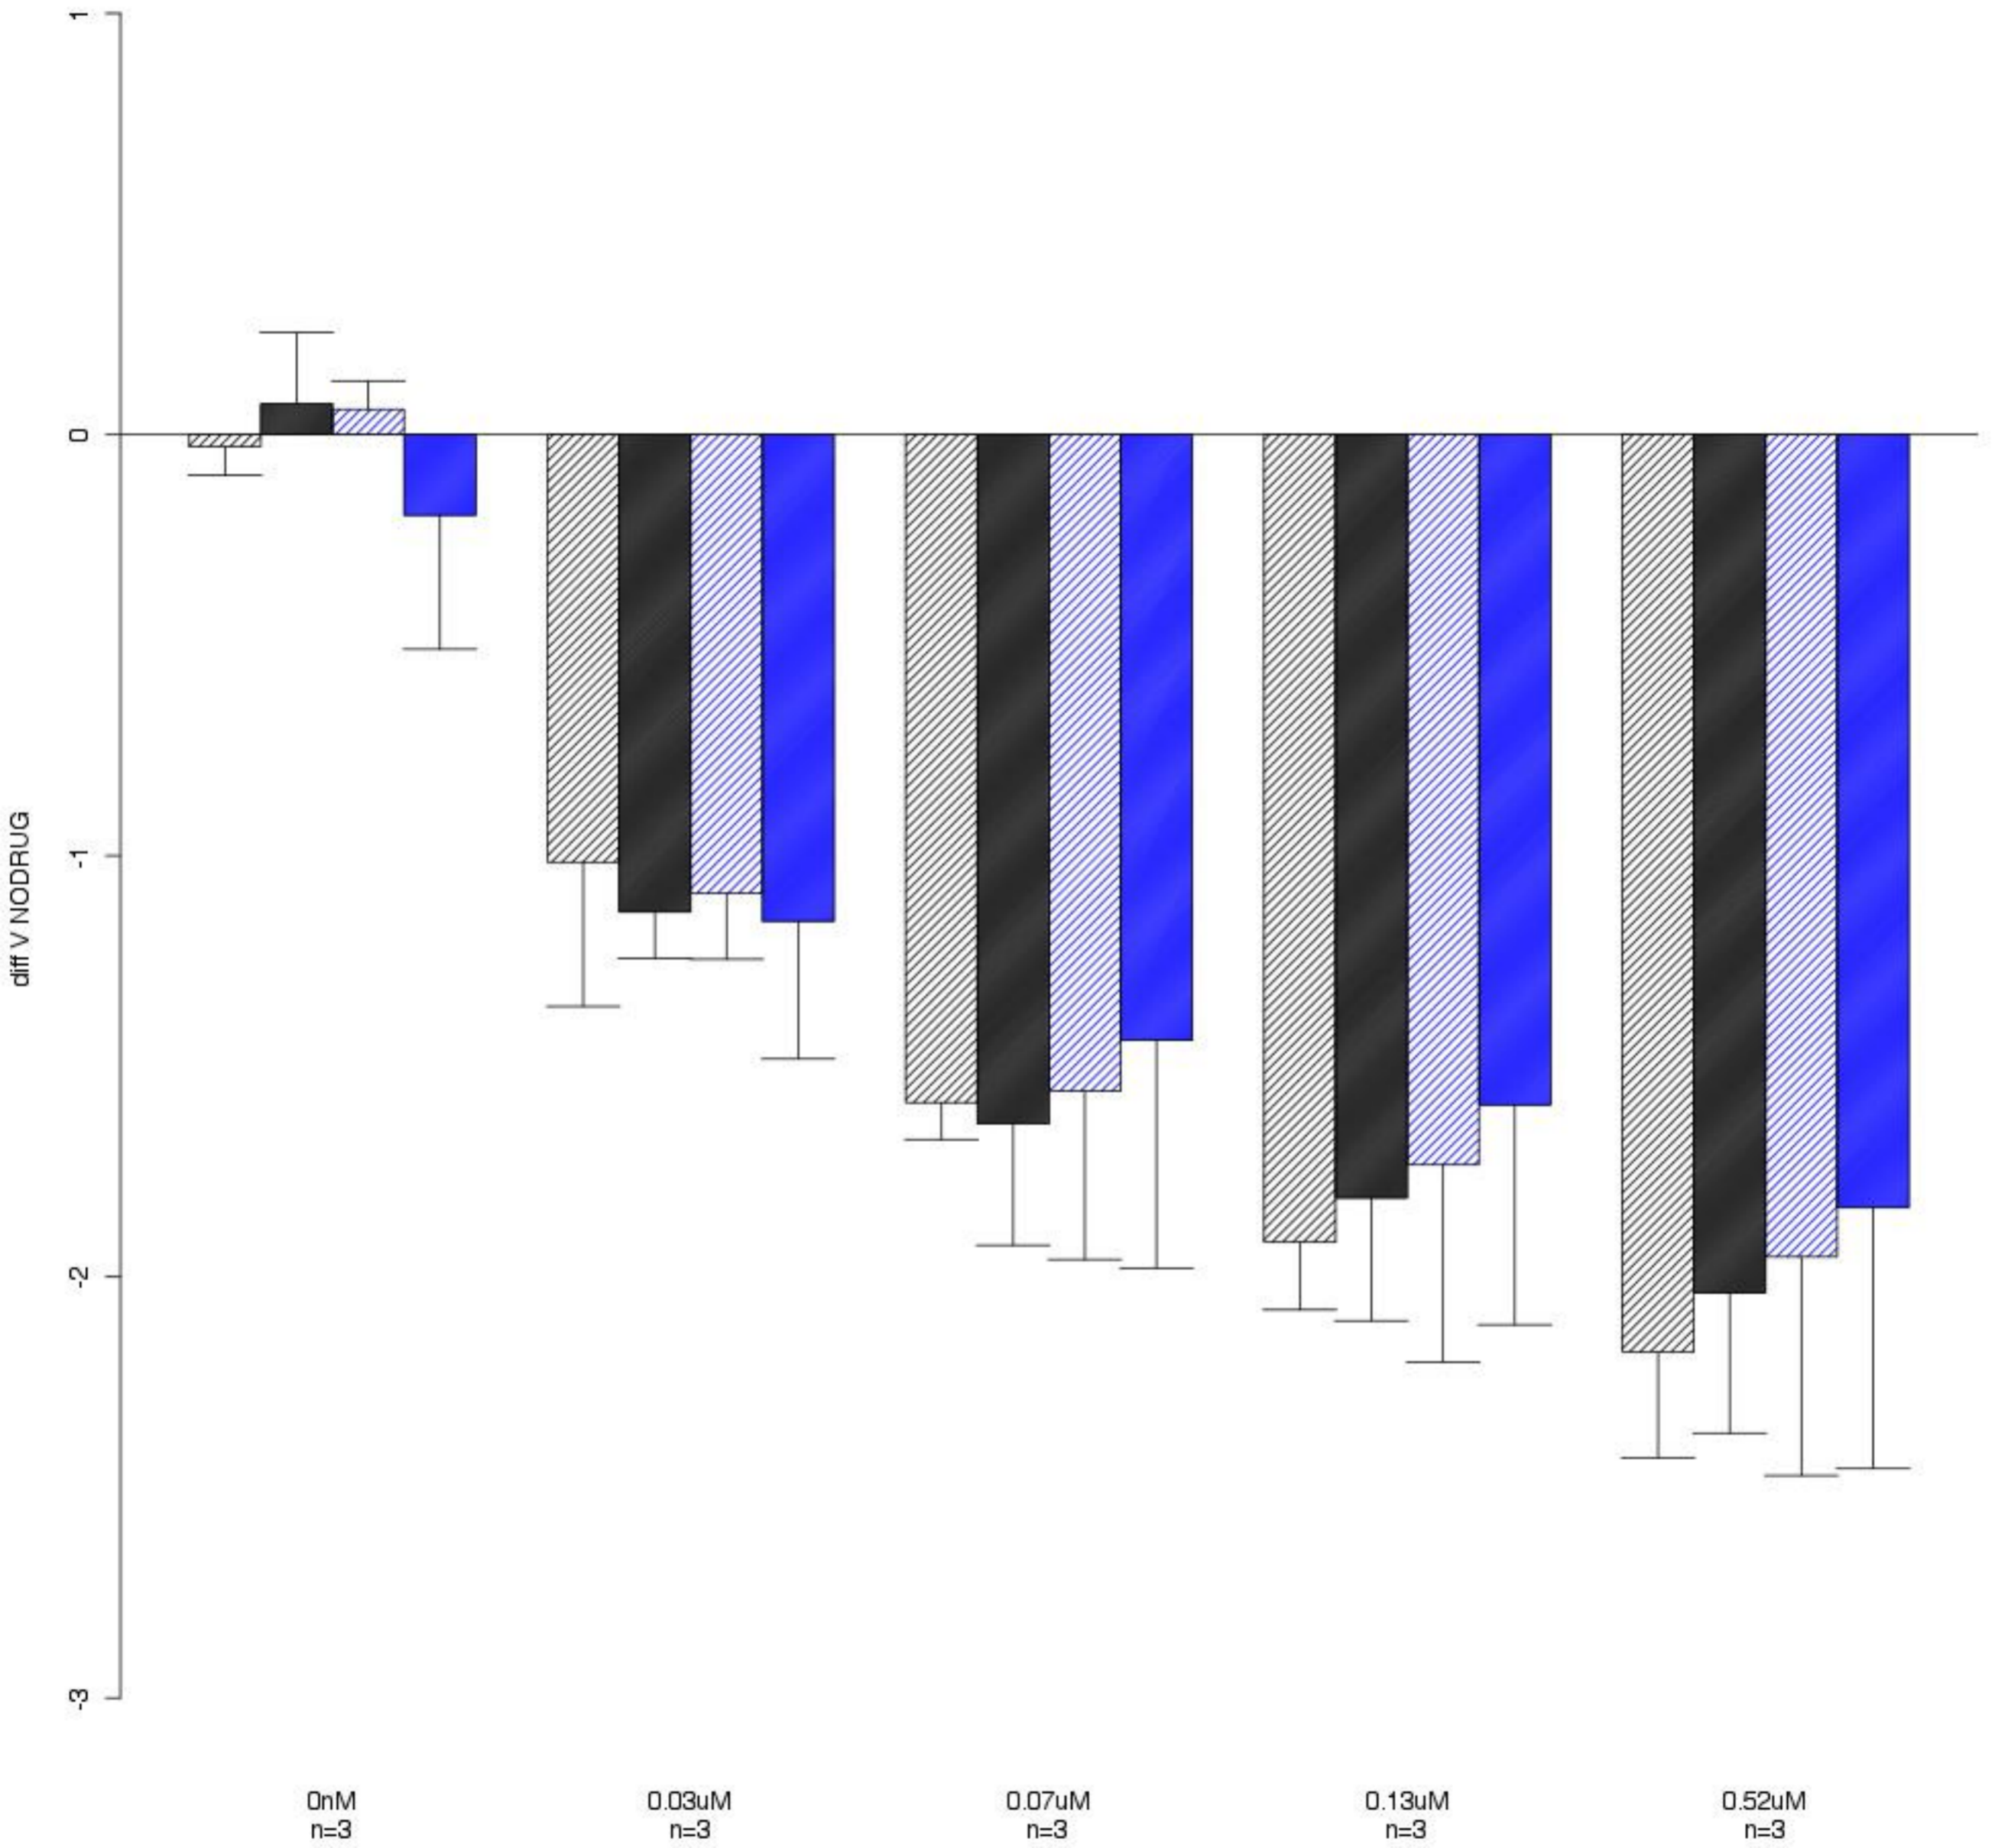

# HEK293\_Etoposide EV

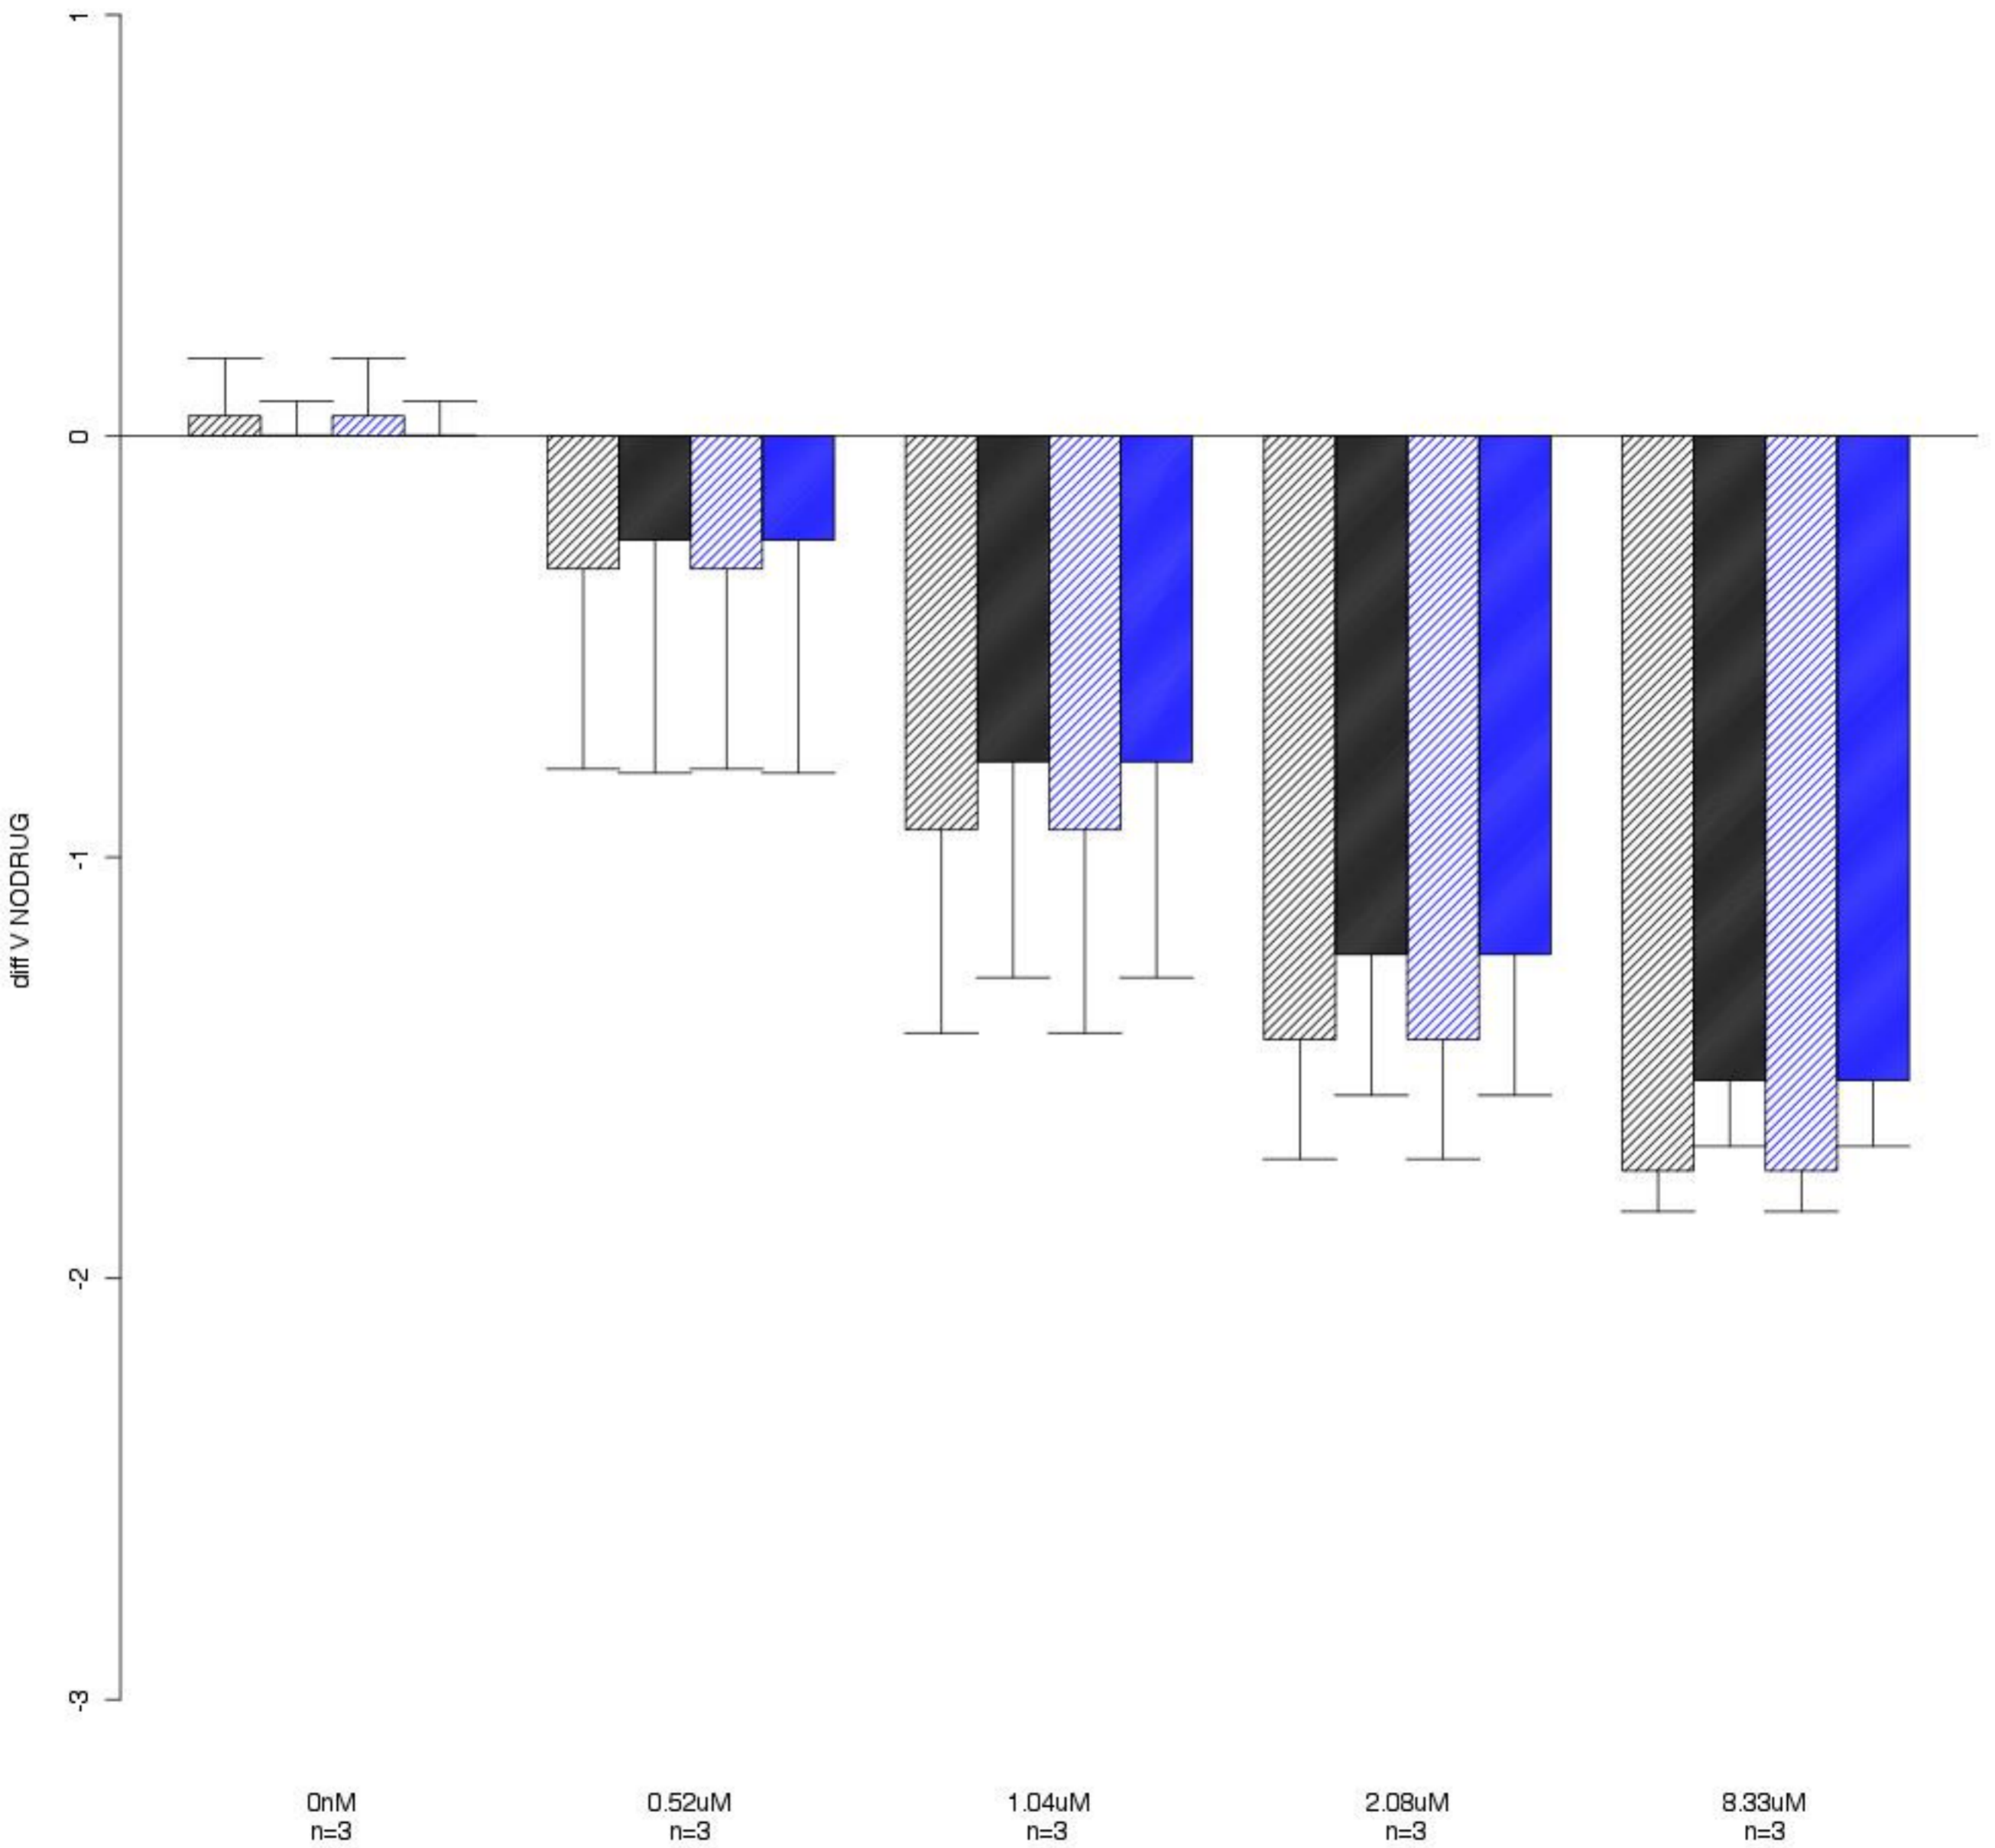

HEK293\_Etoposide  
RHOF2

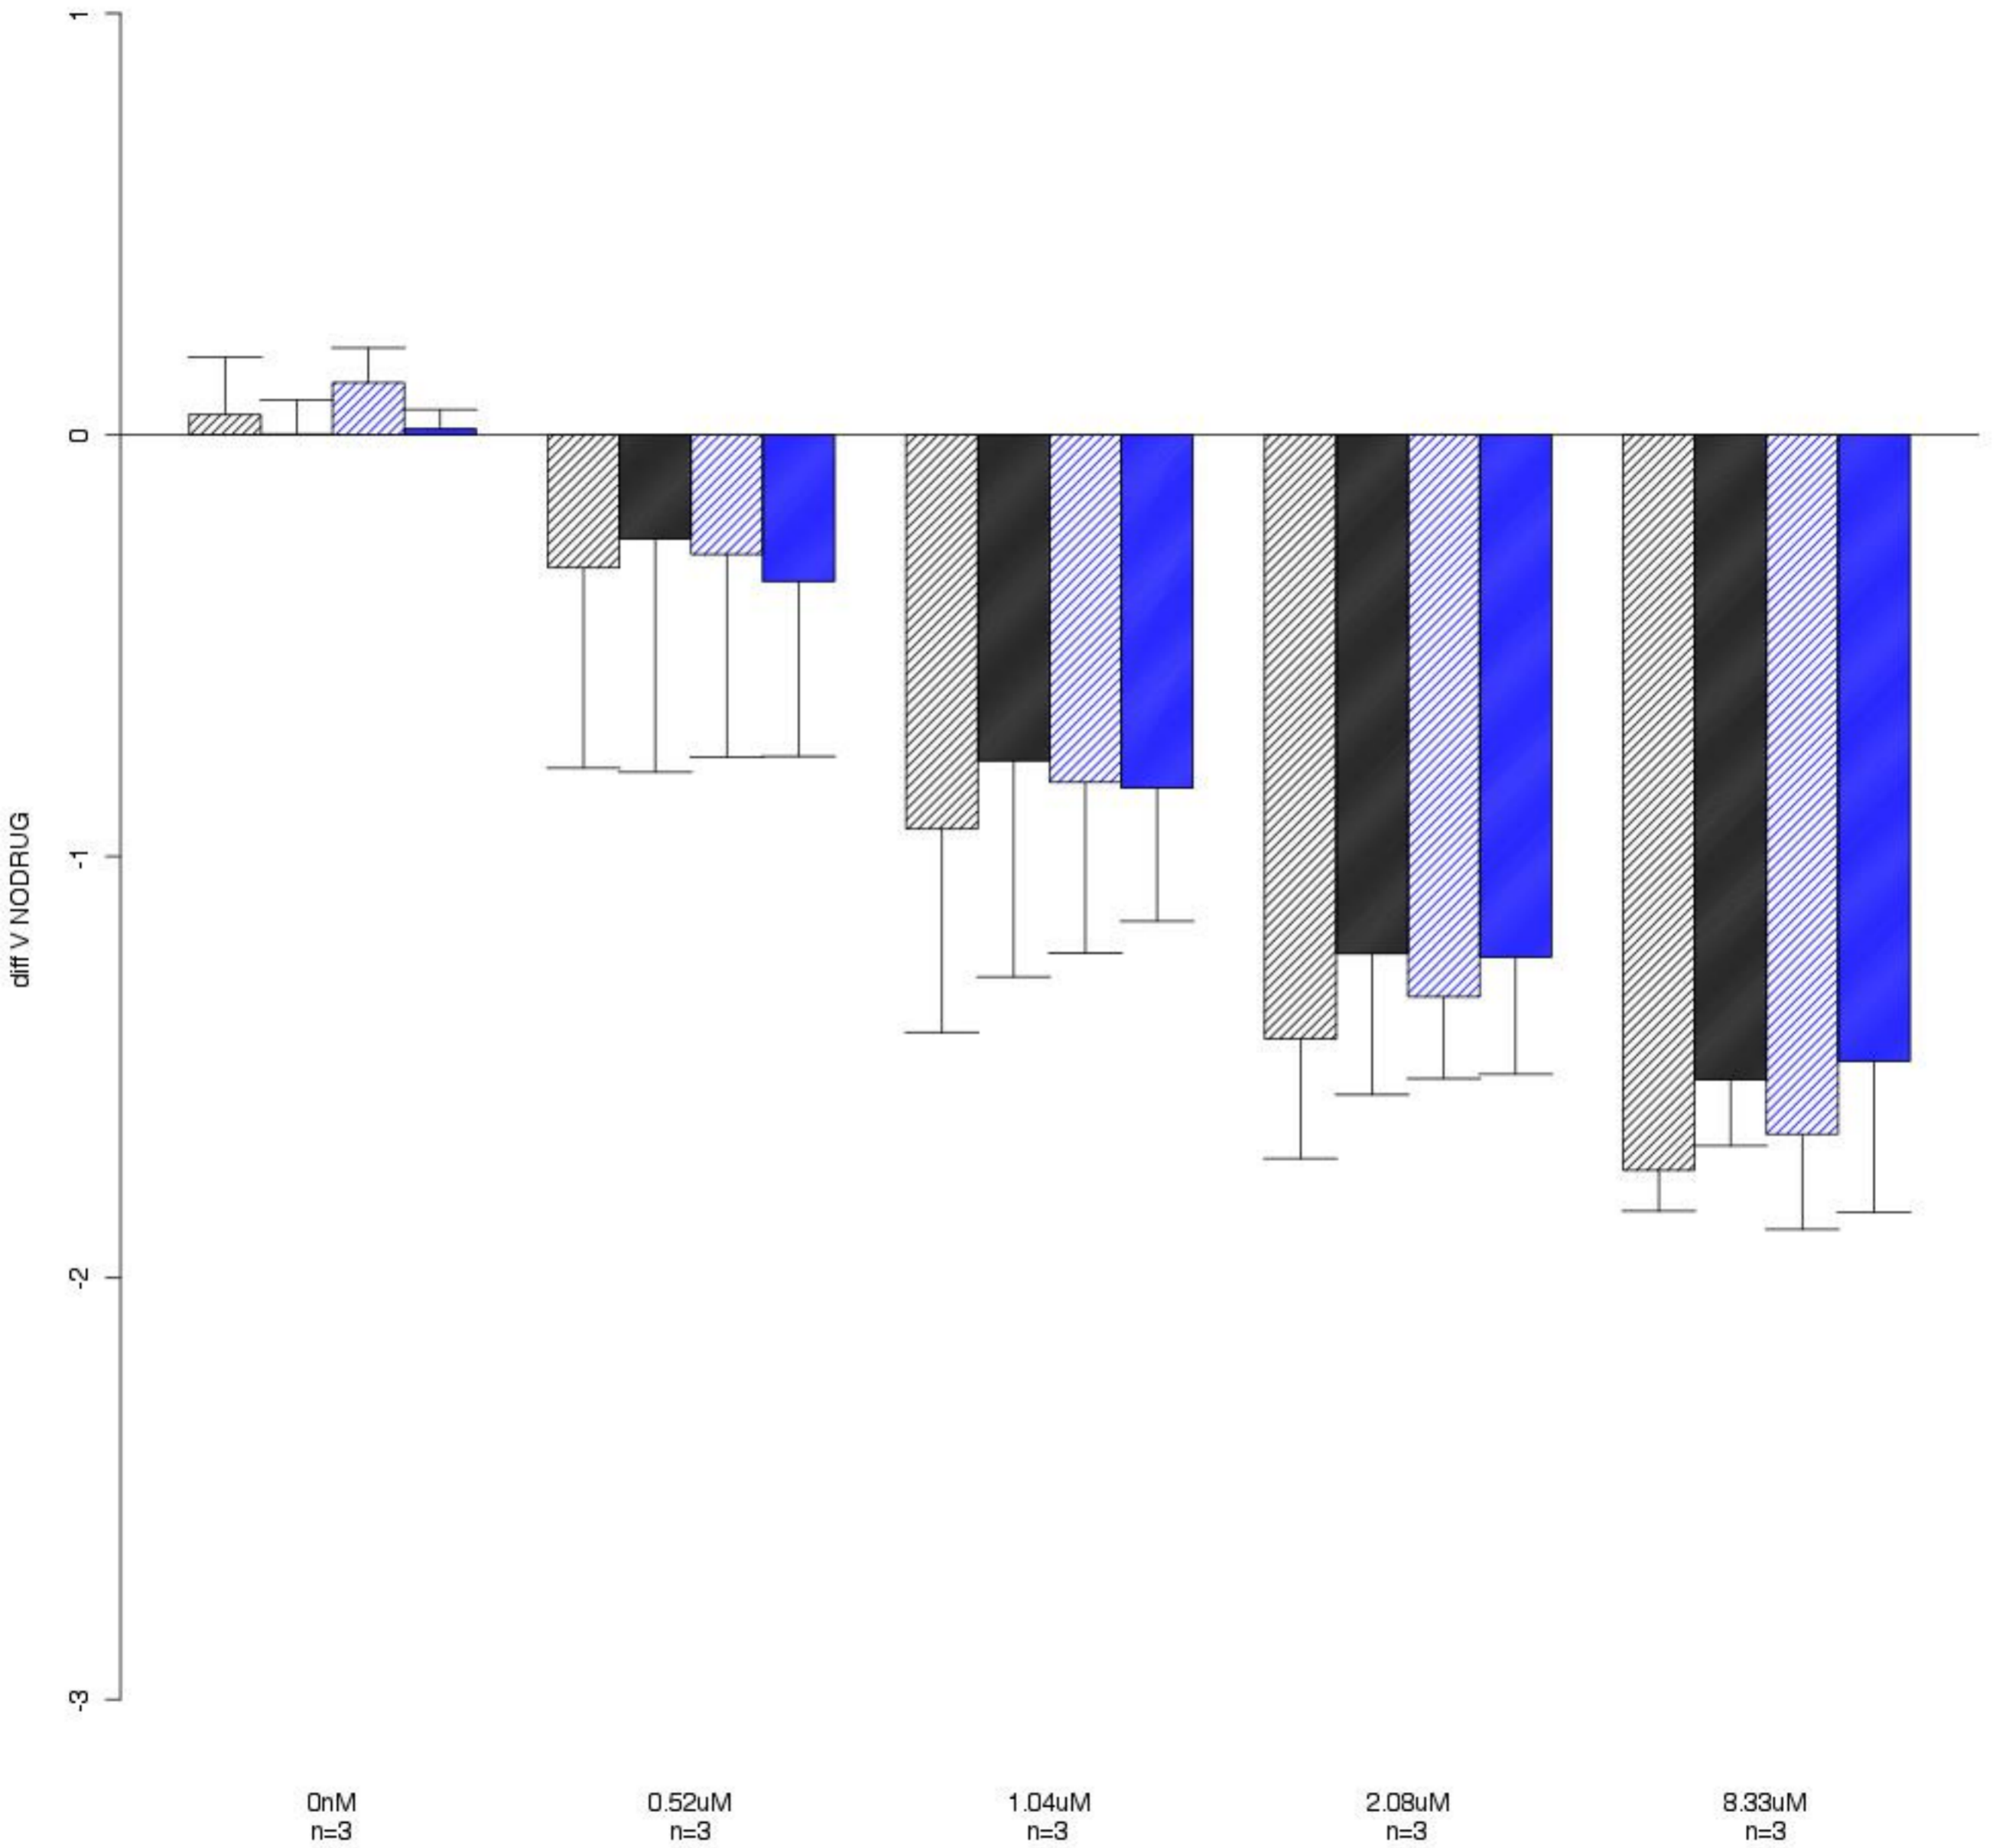

# HEK293\_Hydroxyurea EV

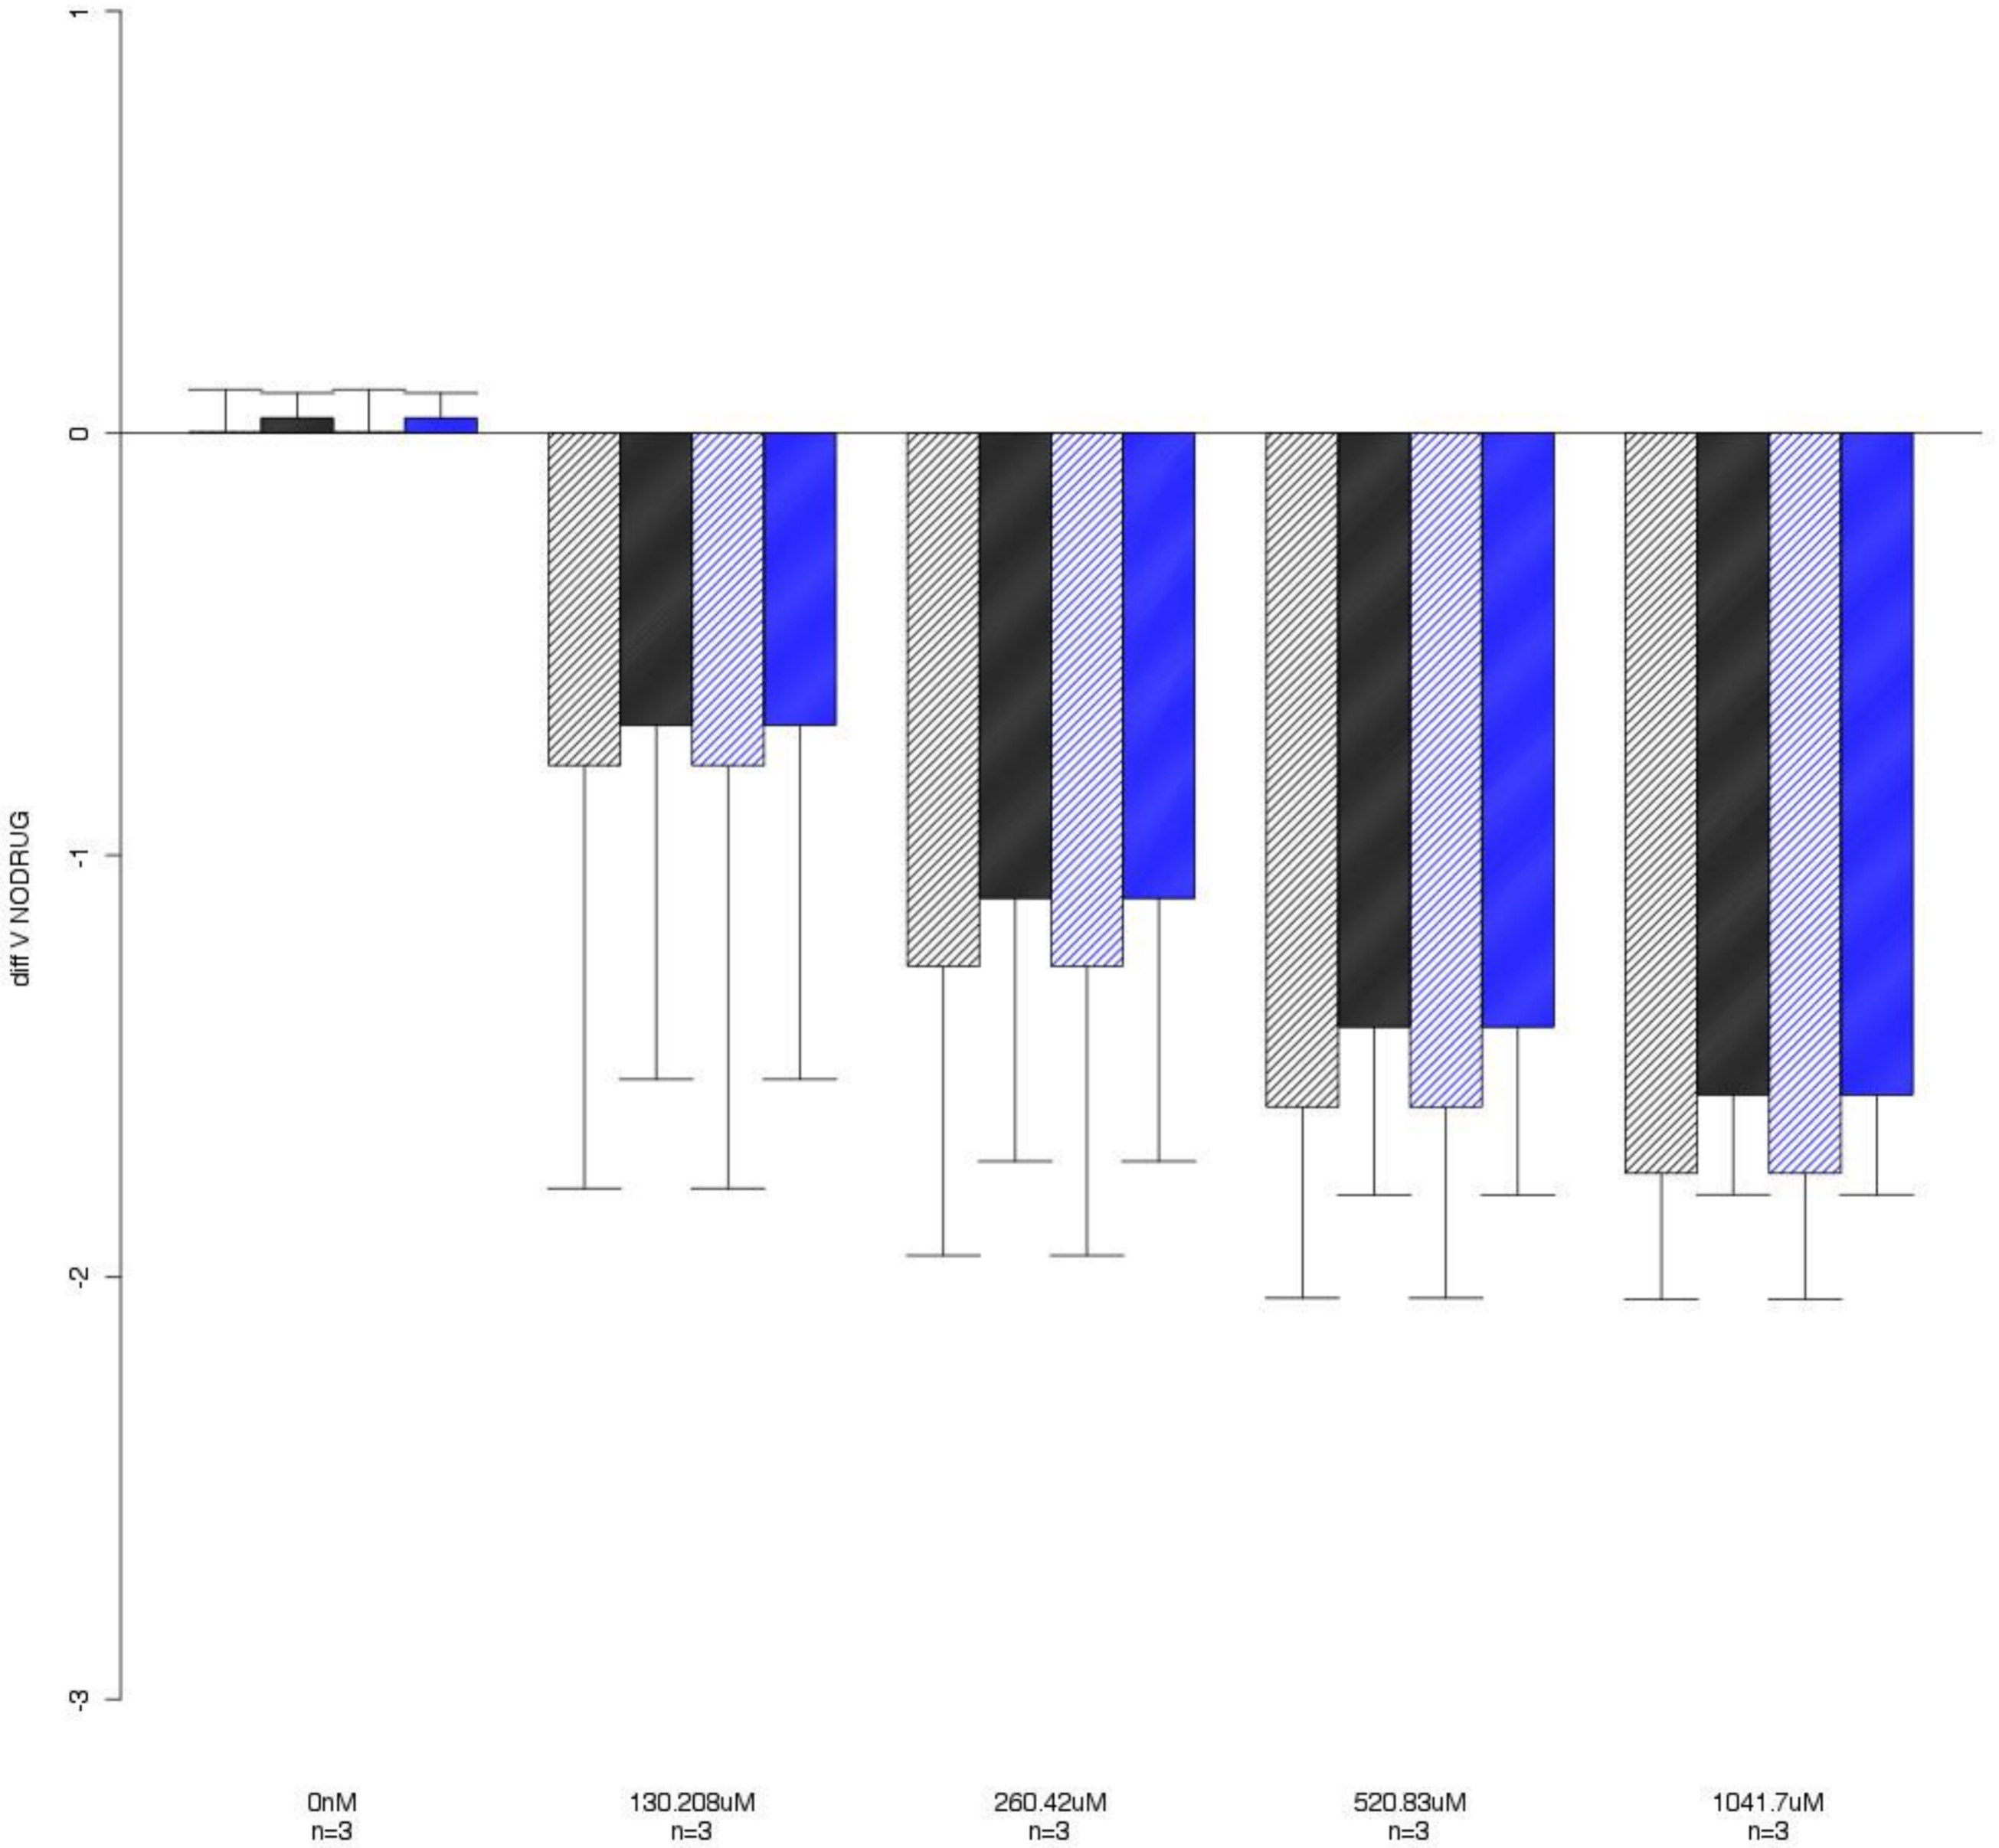

HEK293\_Hydroxyurea  
RHOF2

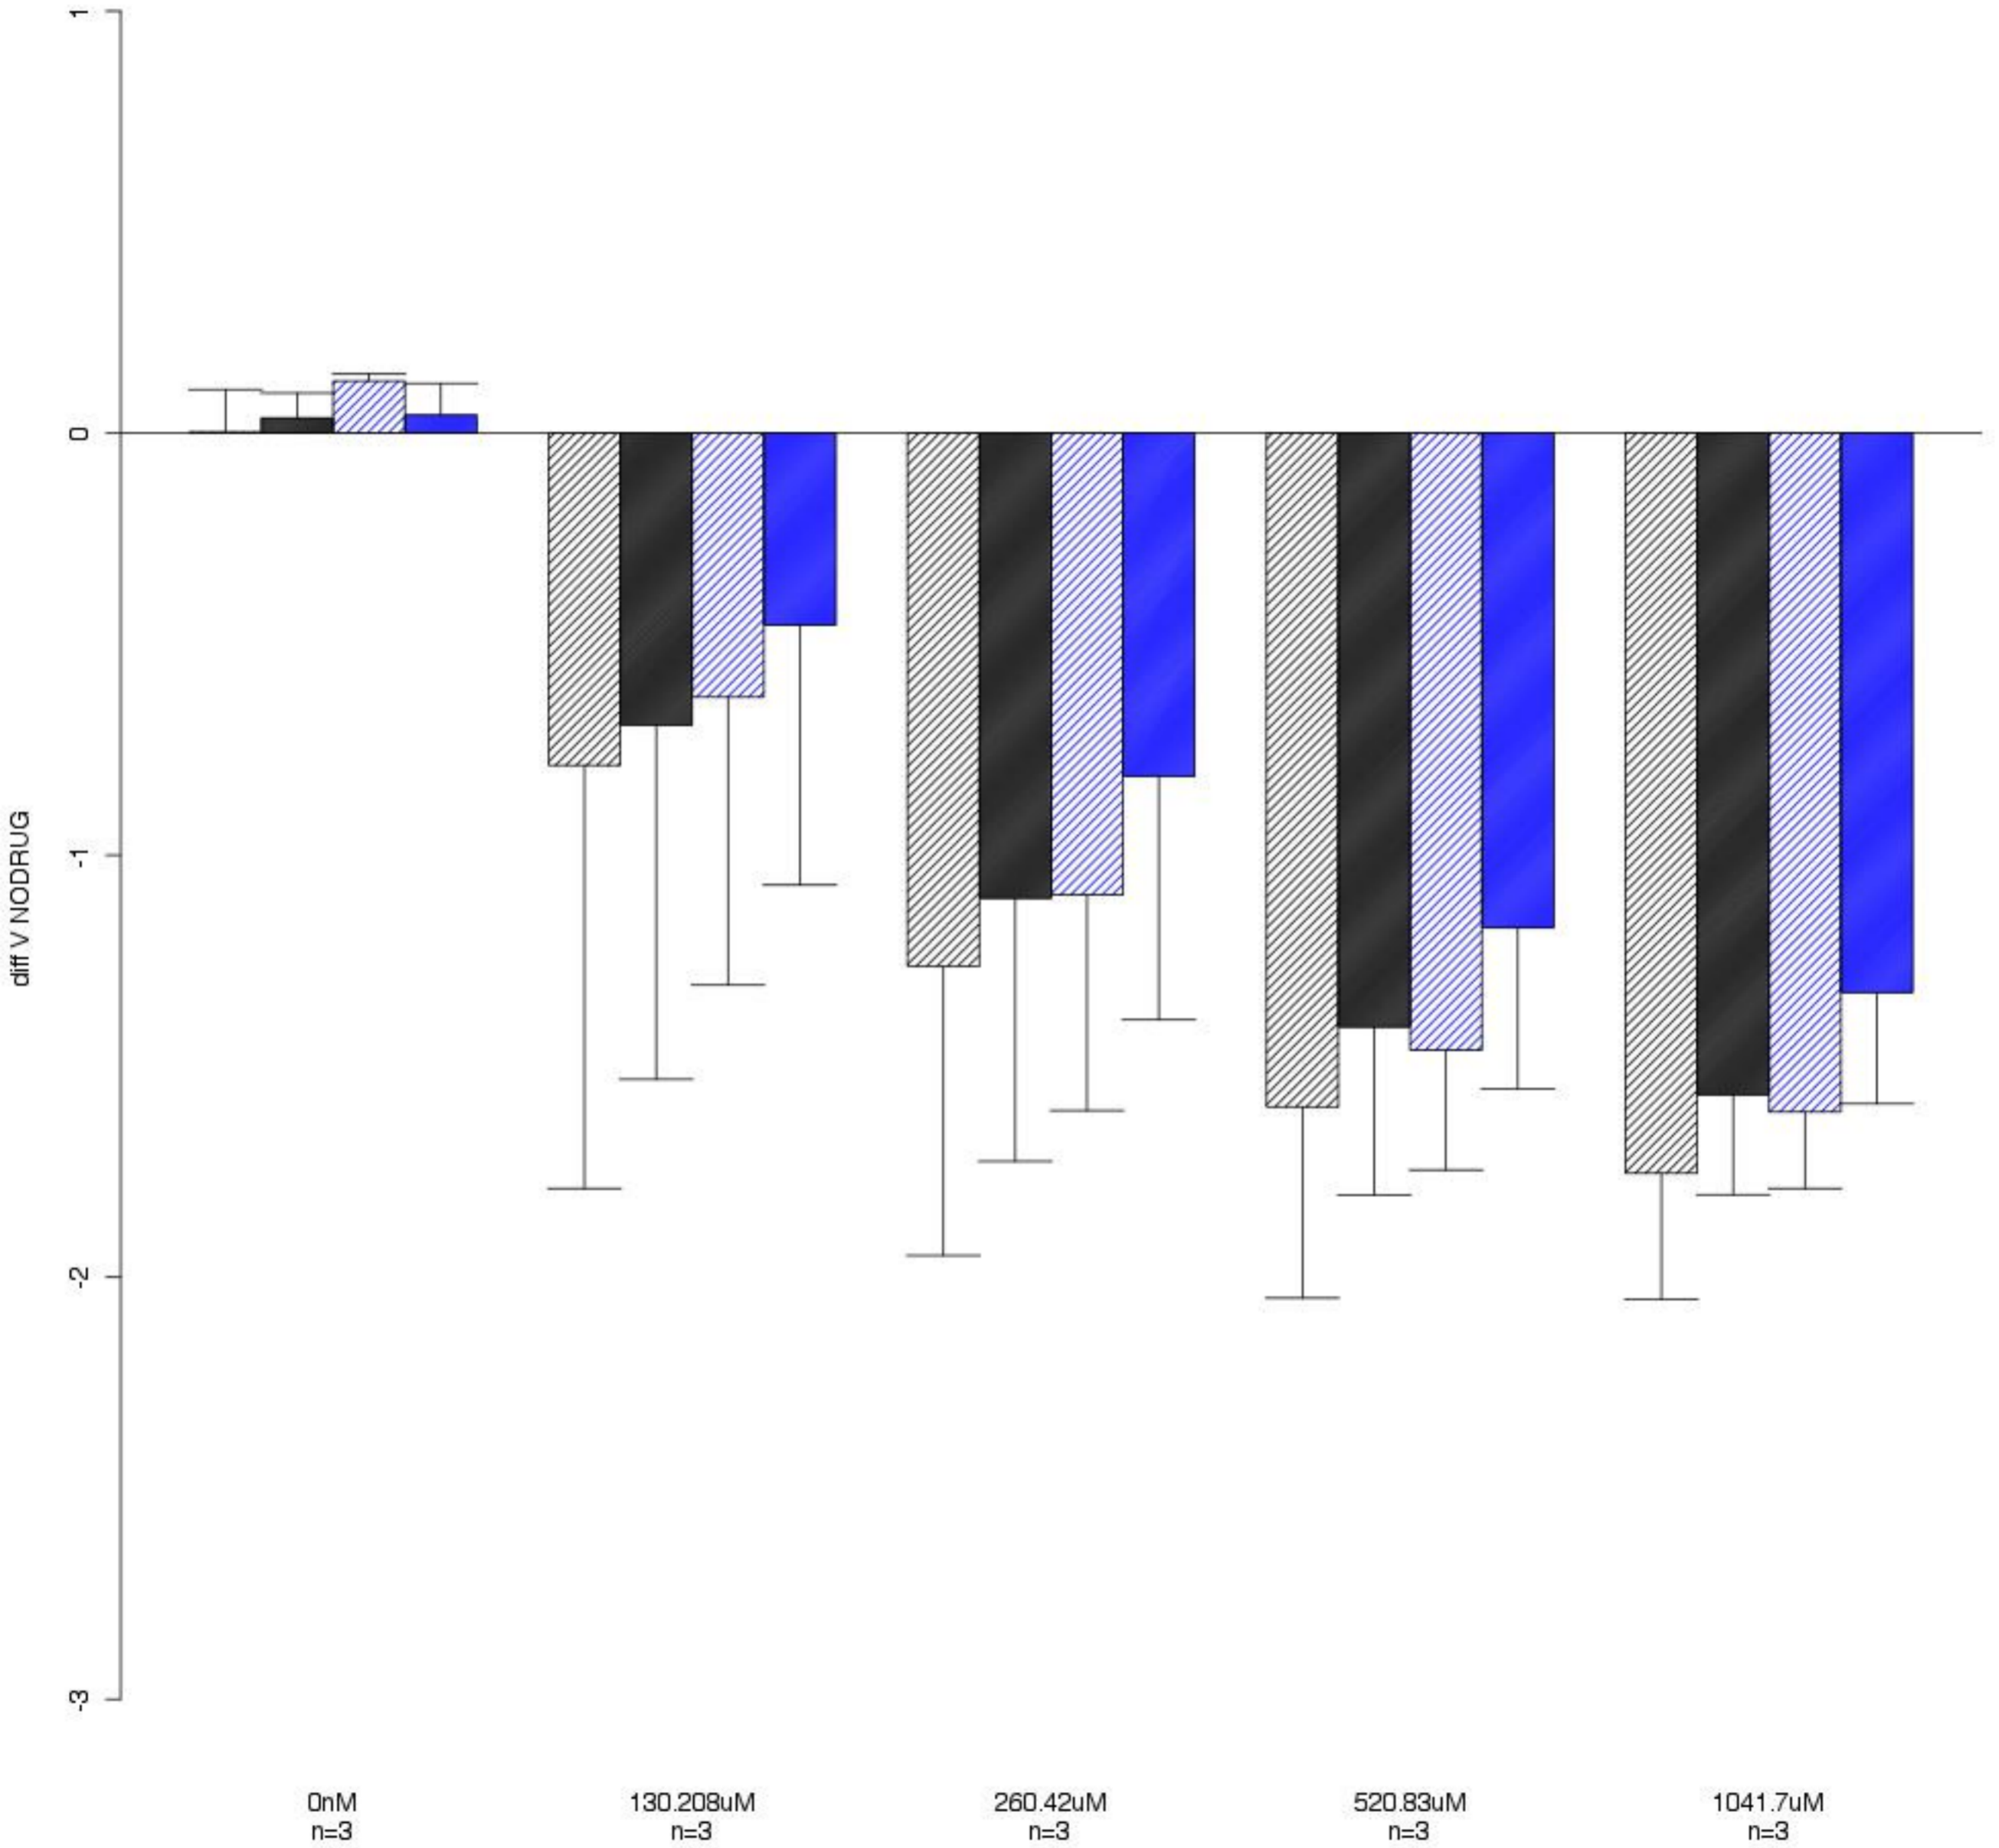

# HEK293\_Methotrexate EV

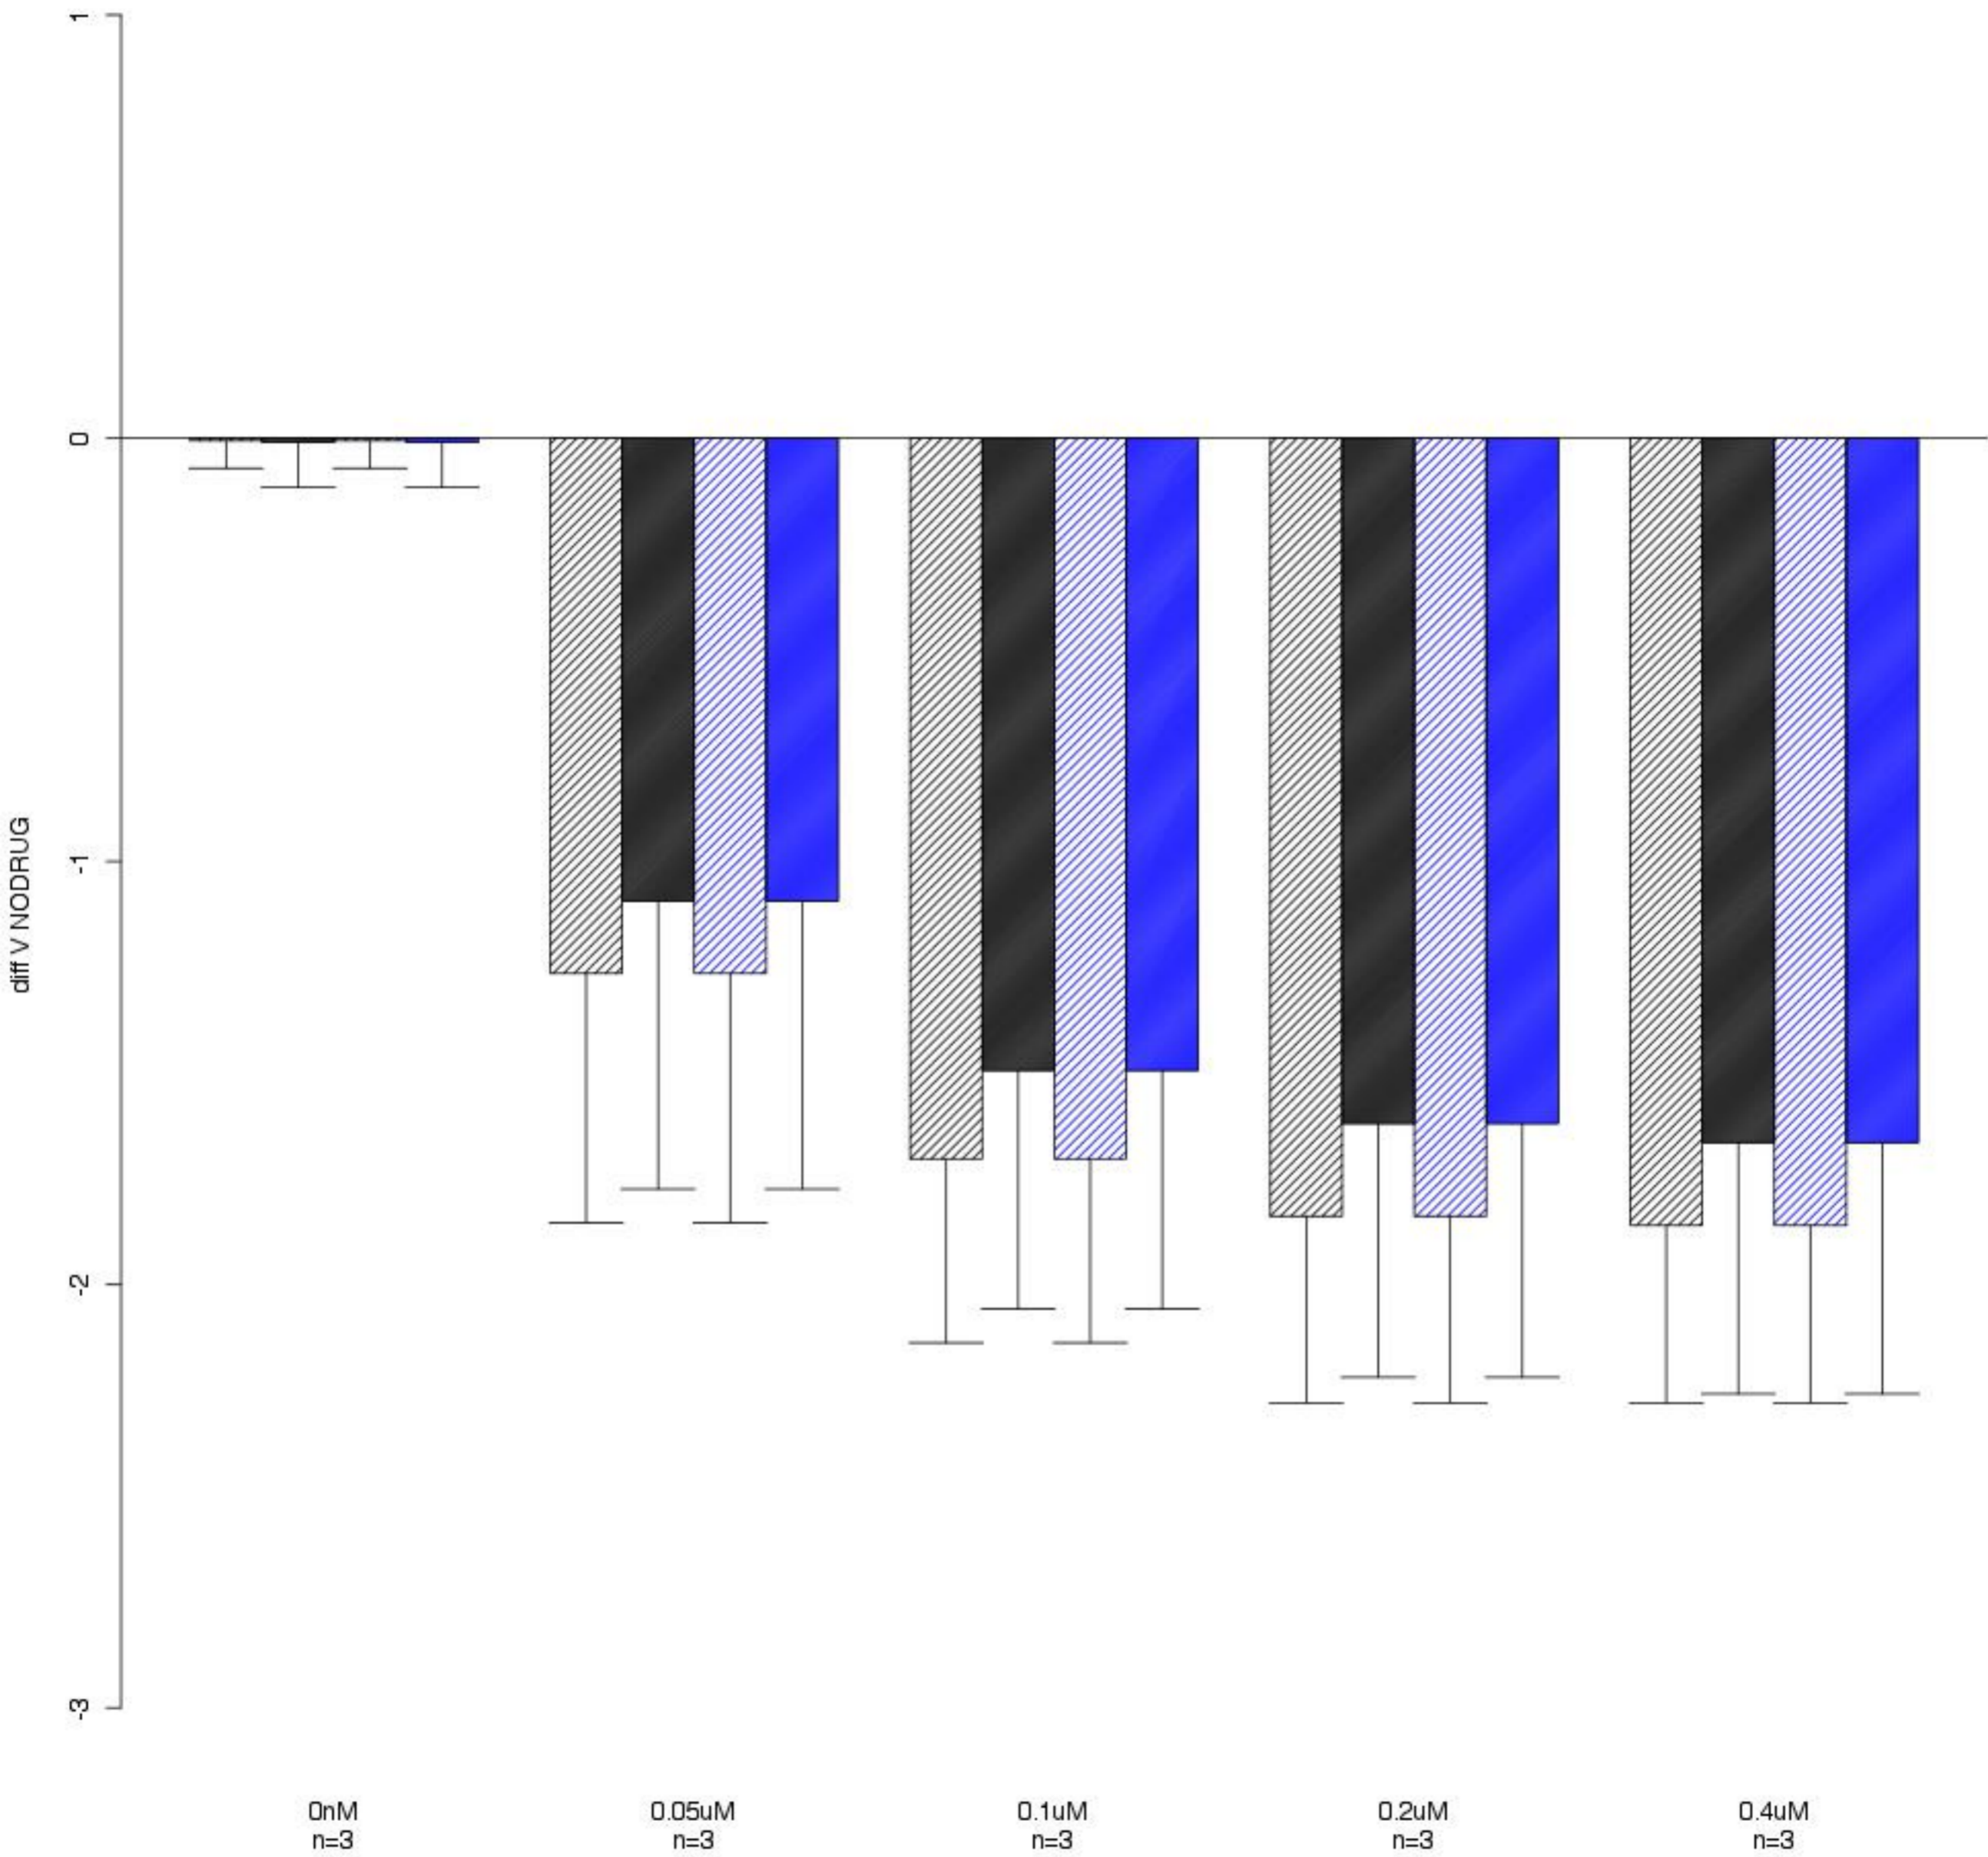

HEK293\_Methotrexate  
RHOXF2

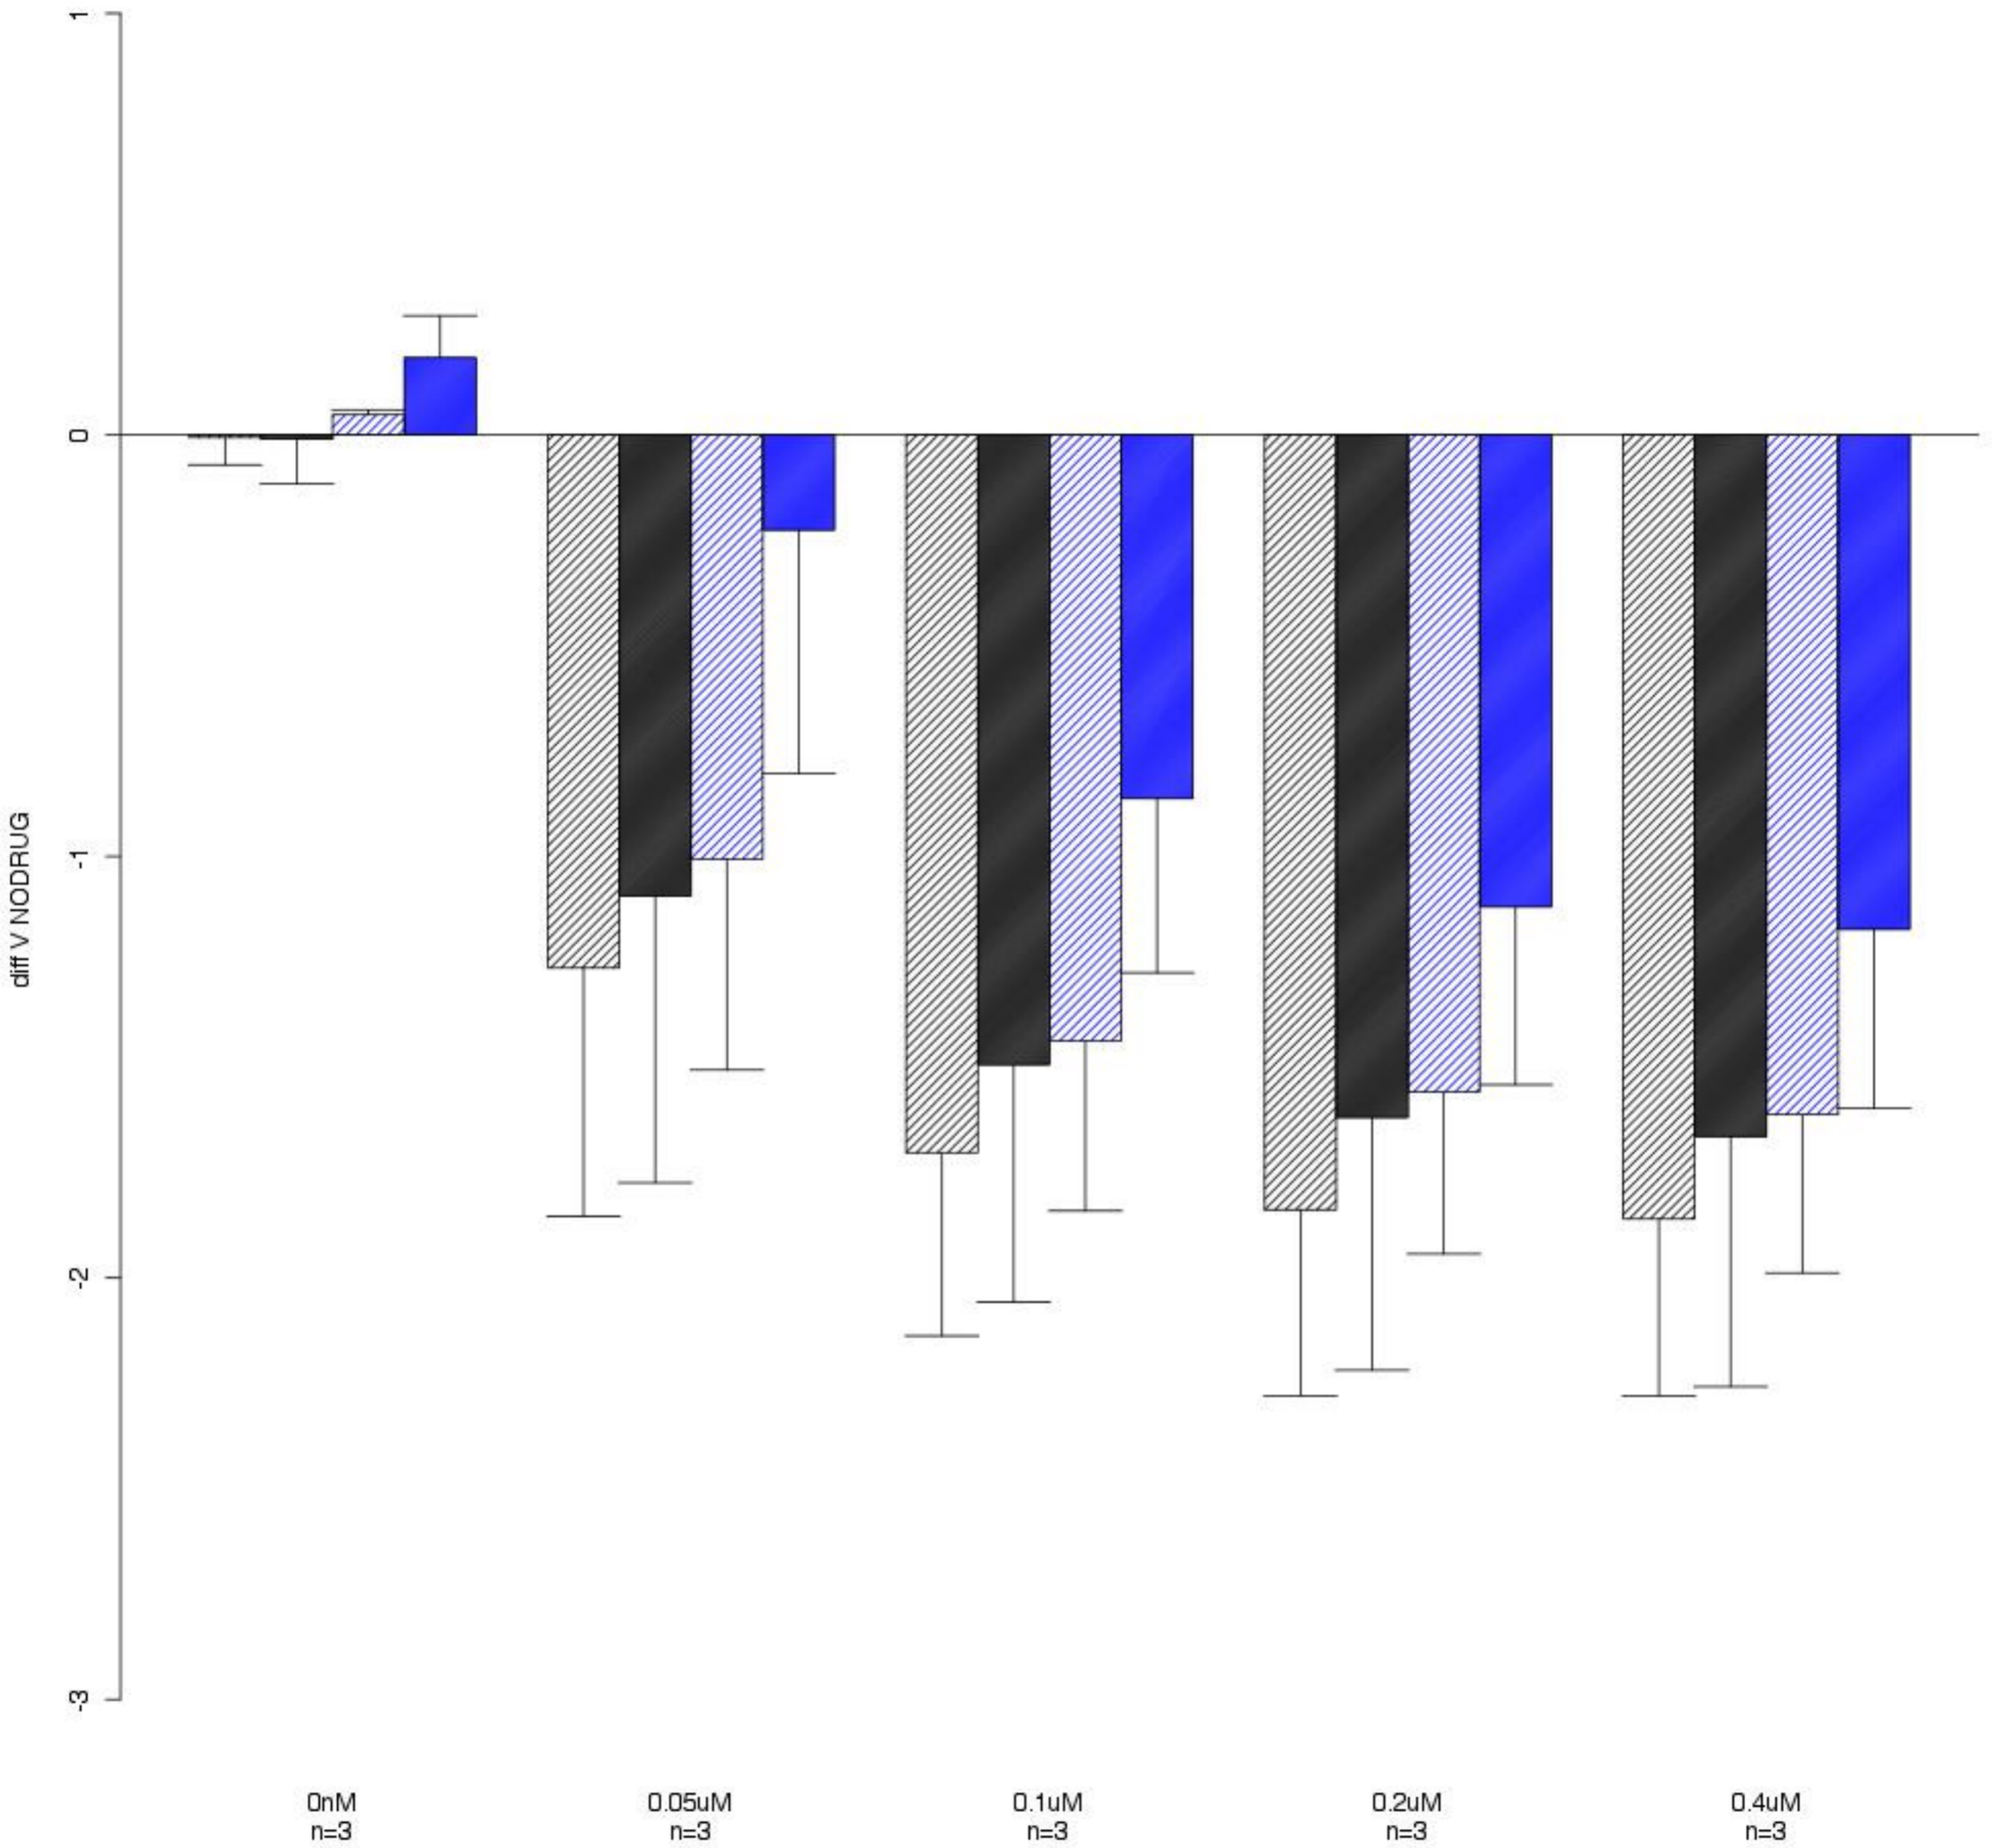



# HEK293\_Mitaplatin EV

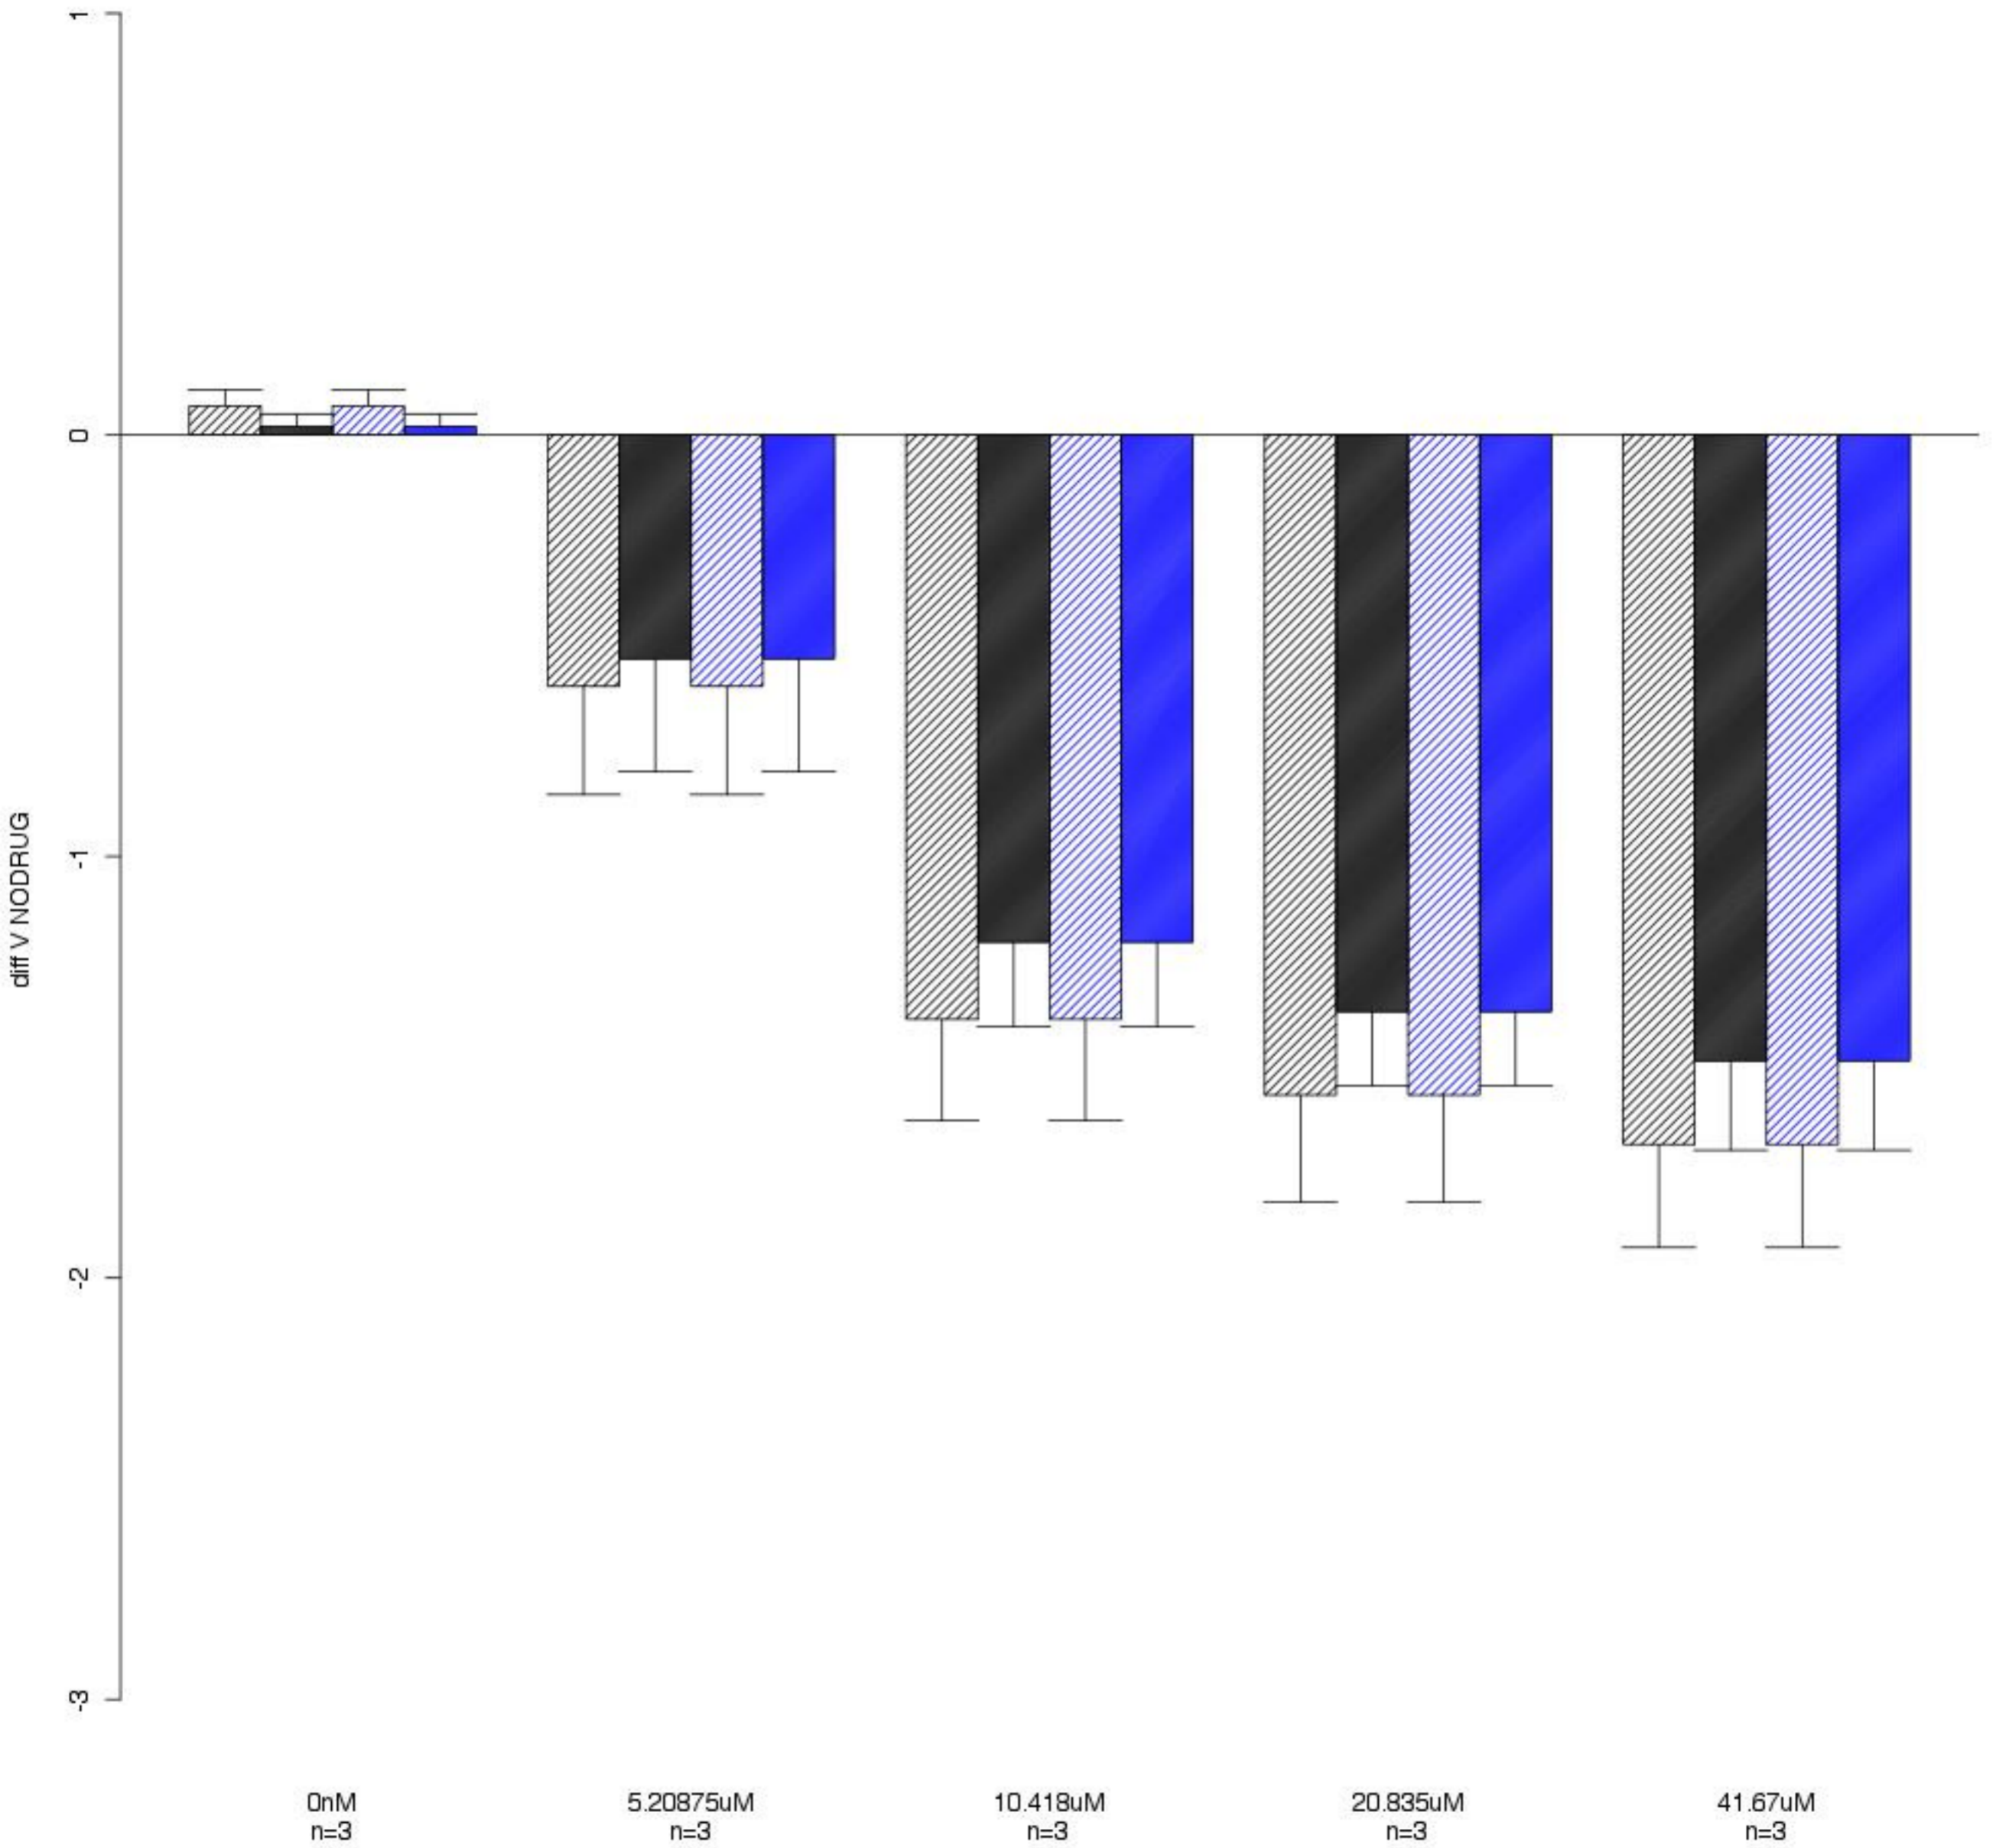

HEK293\_Mitaplatin  
RHOXF2

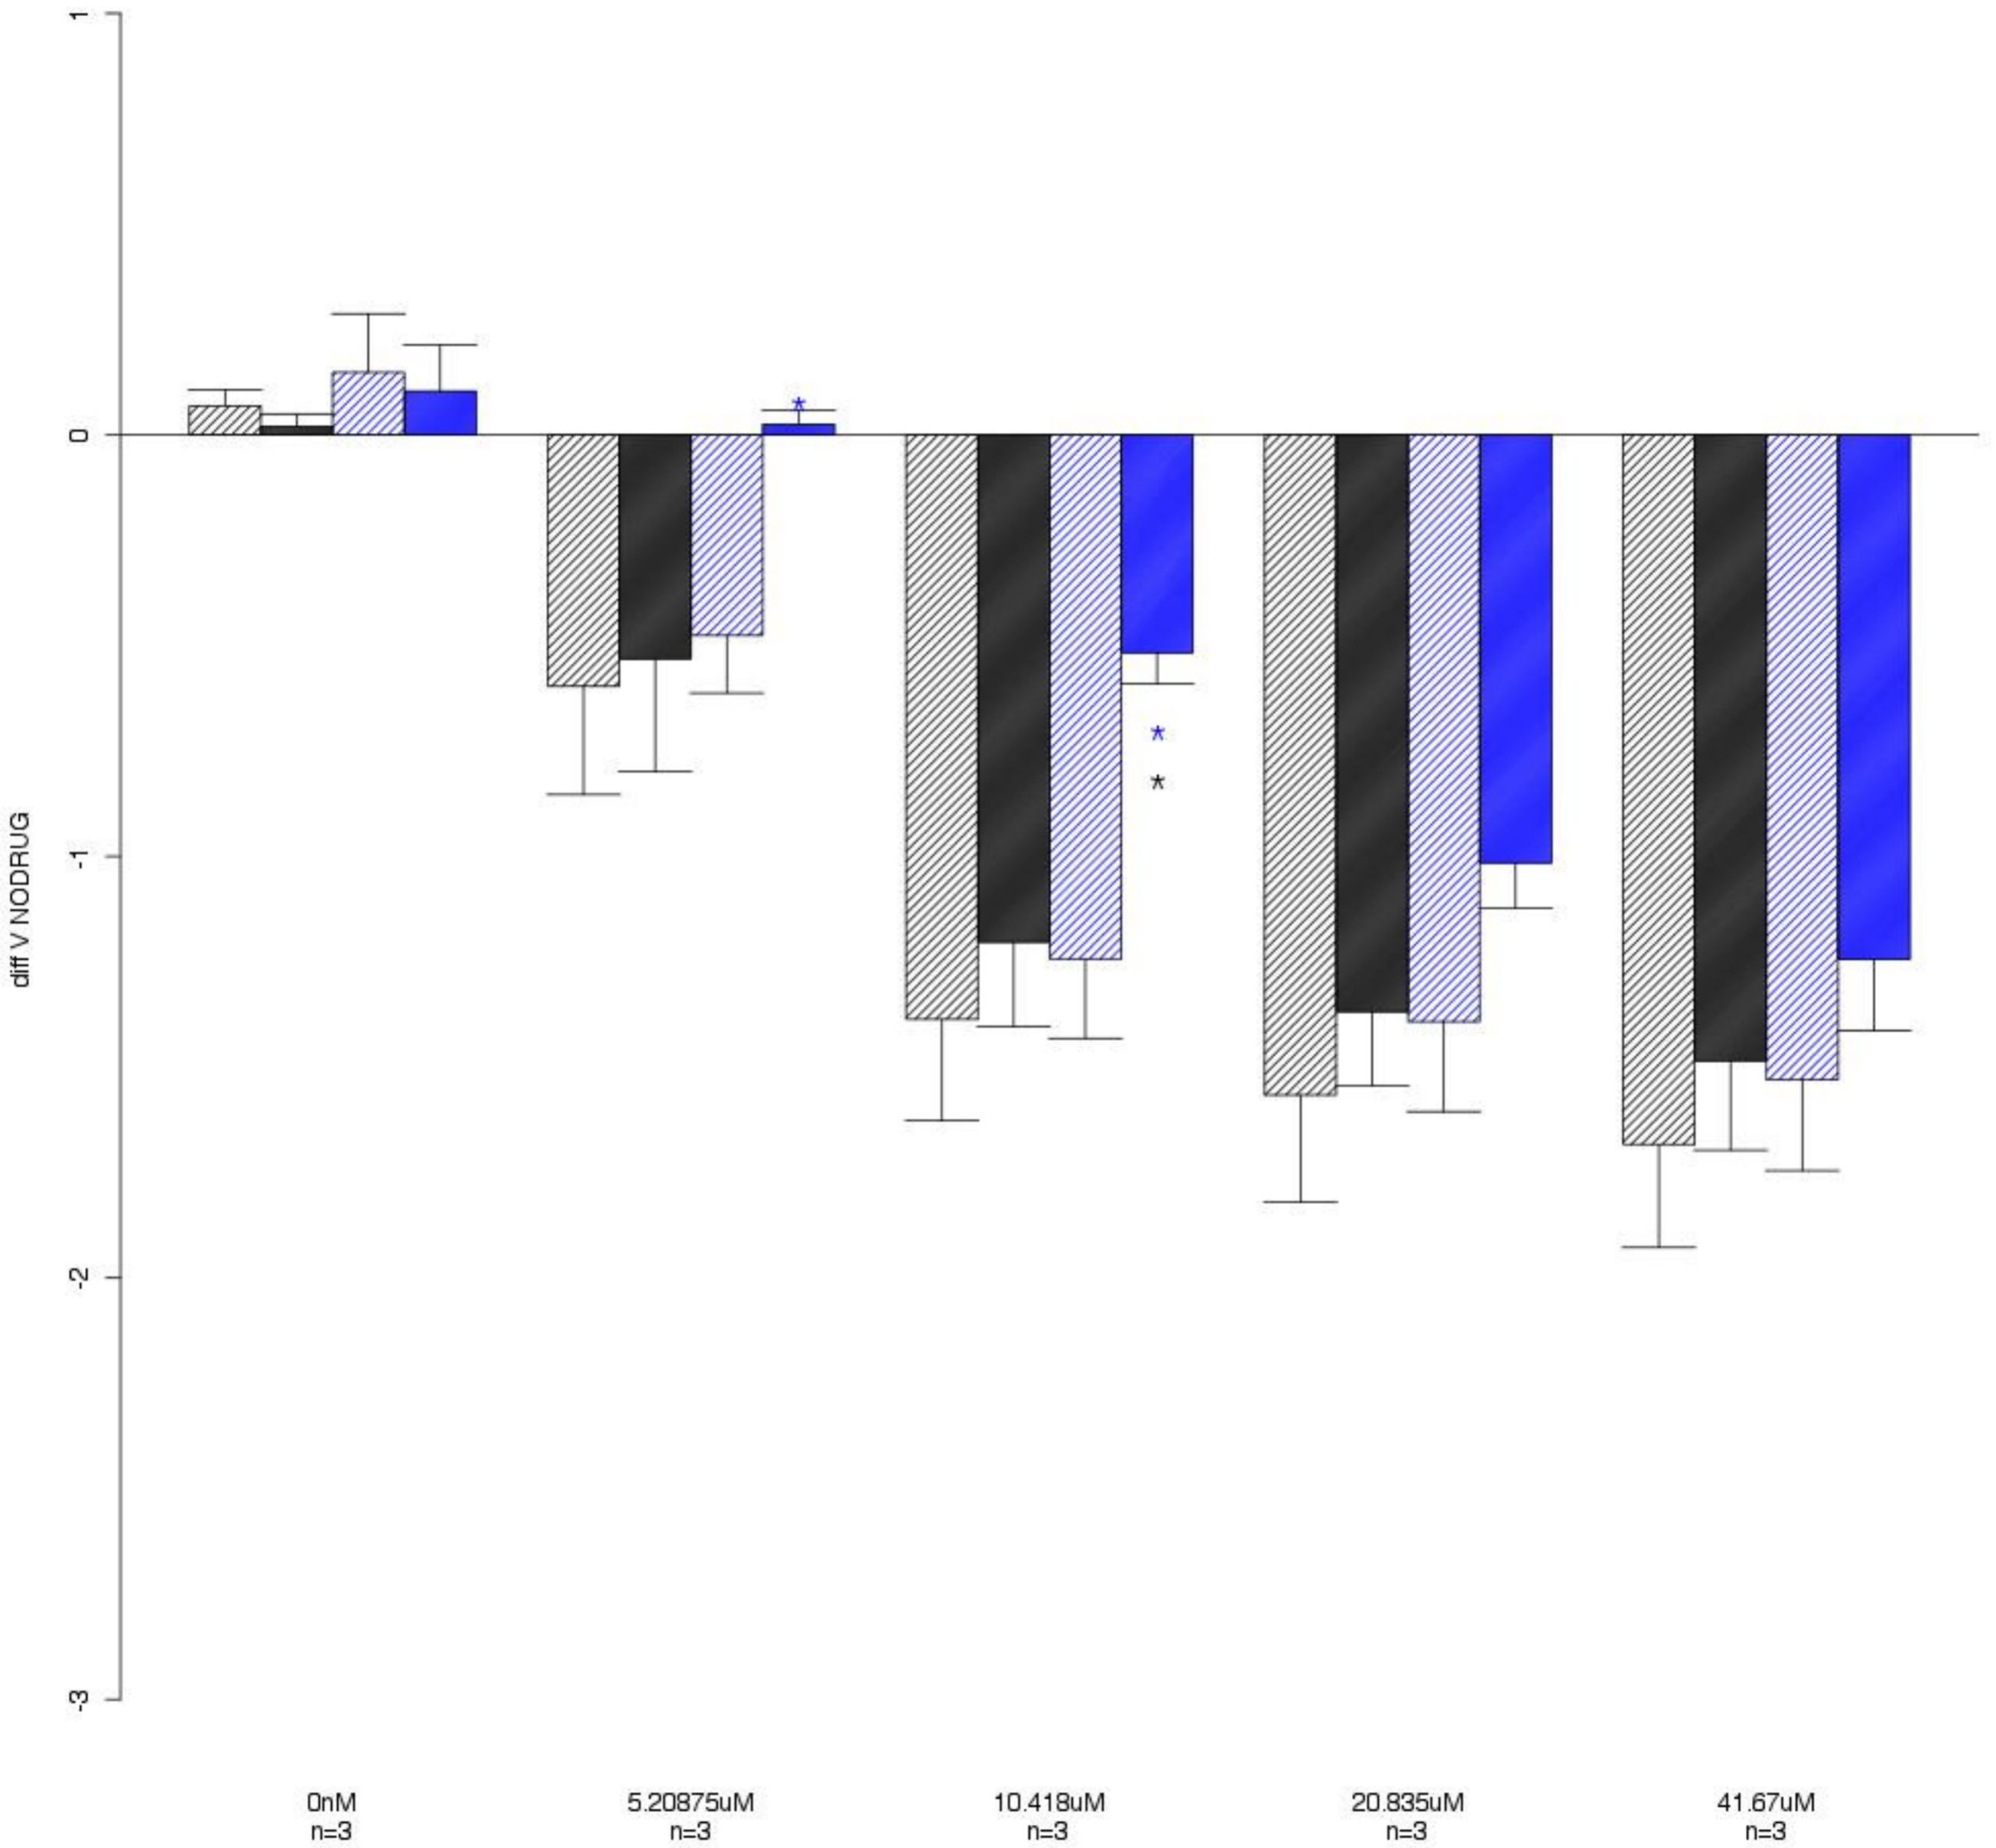

HEK293\_PT-ACRAMTU(EN)  
EV

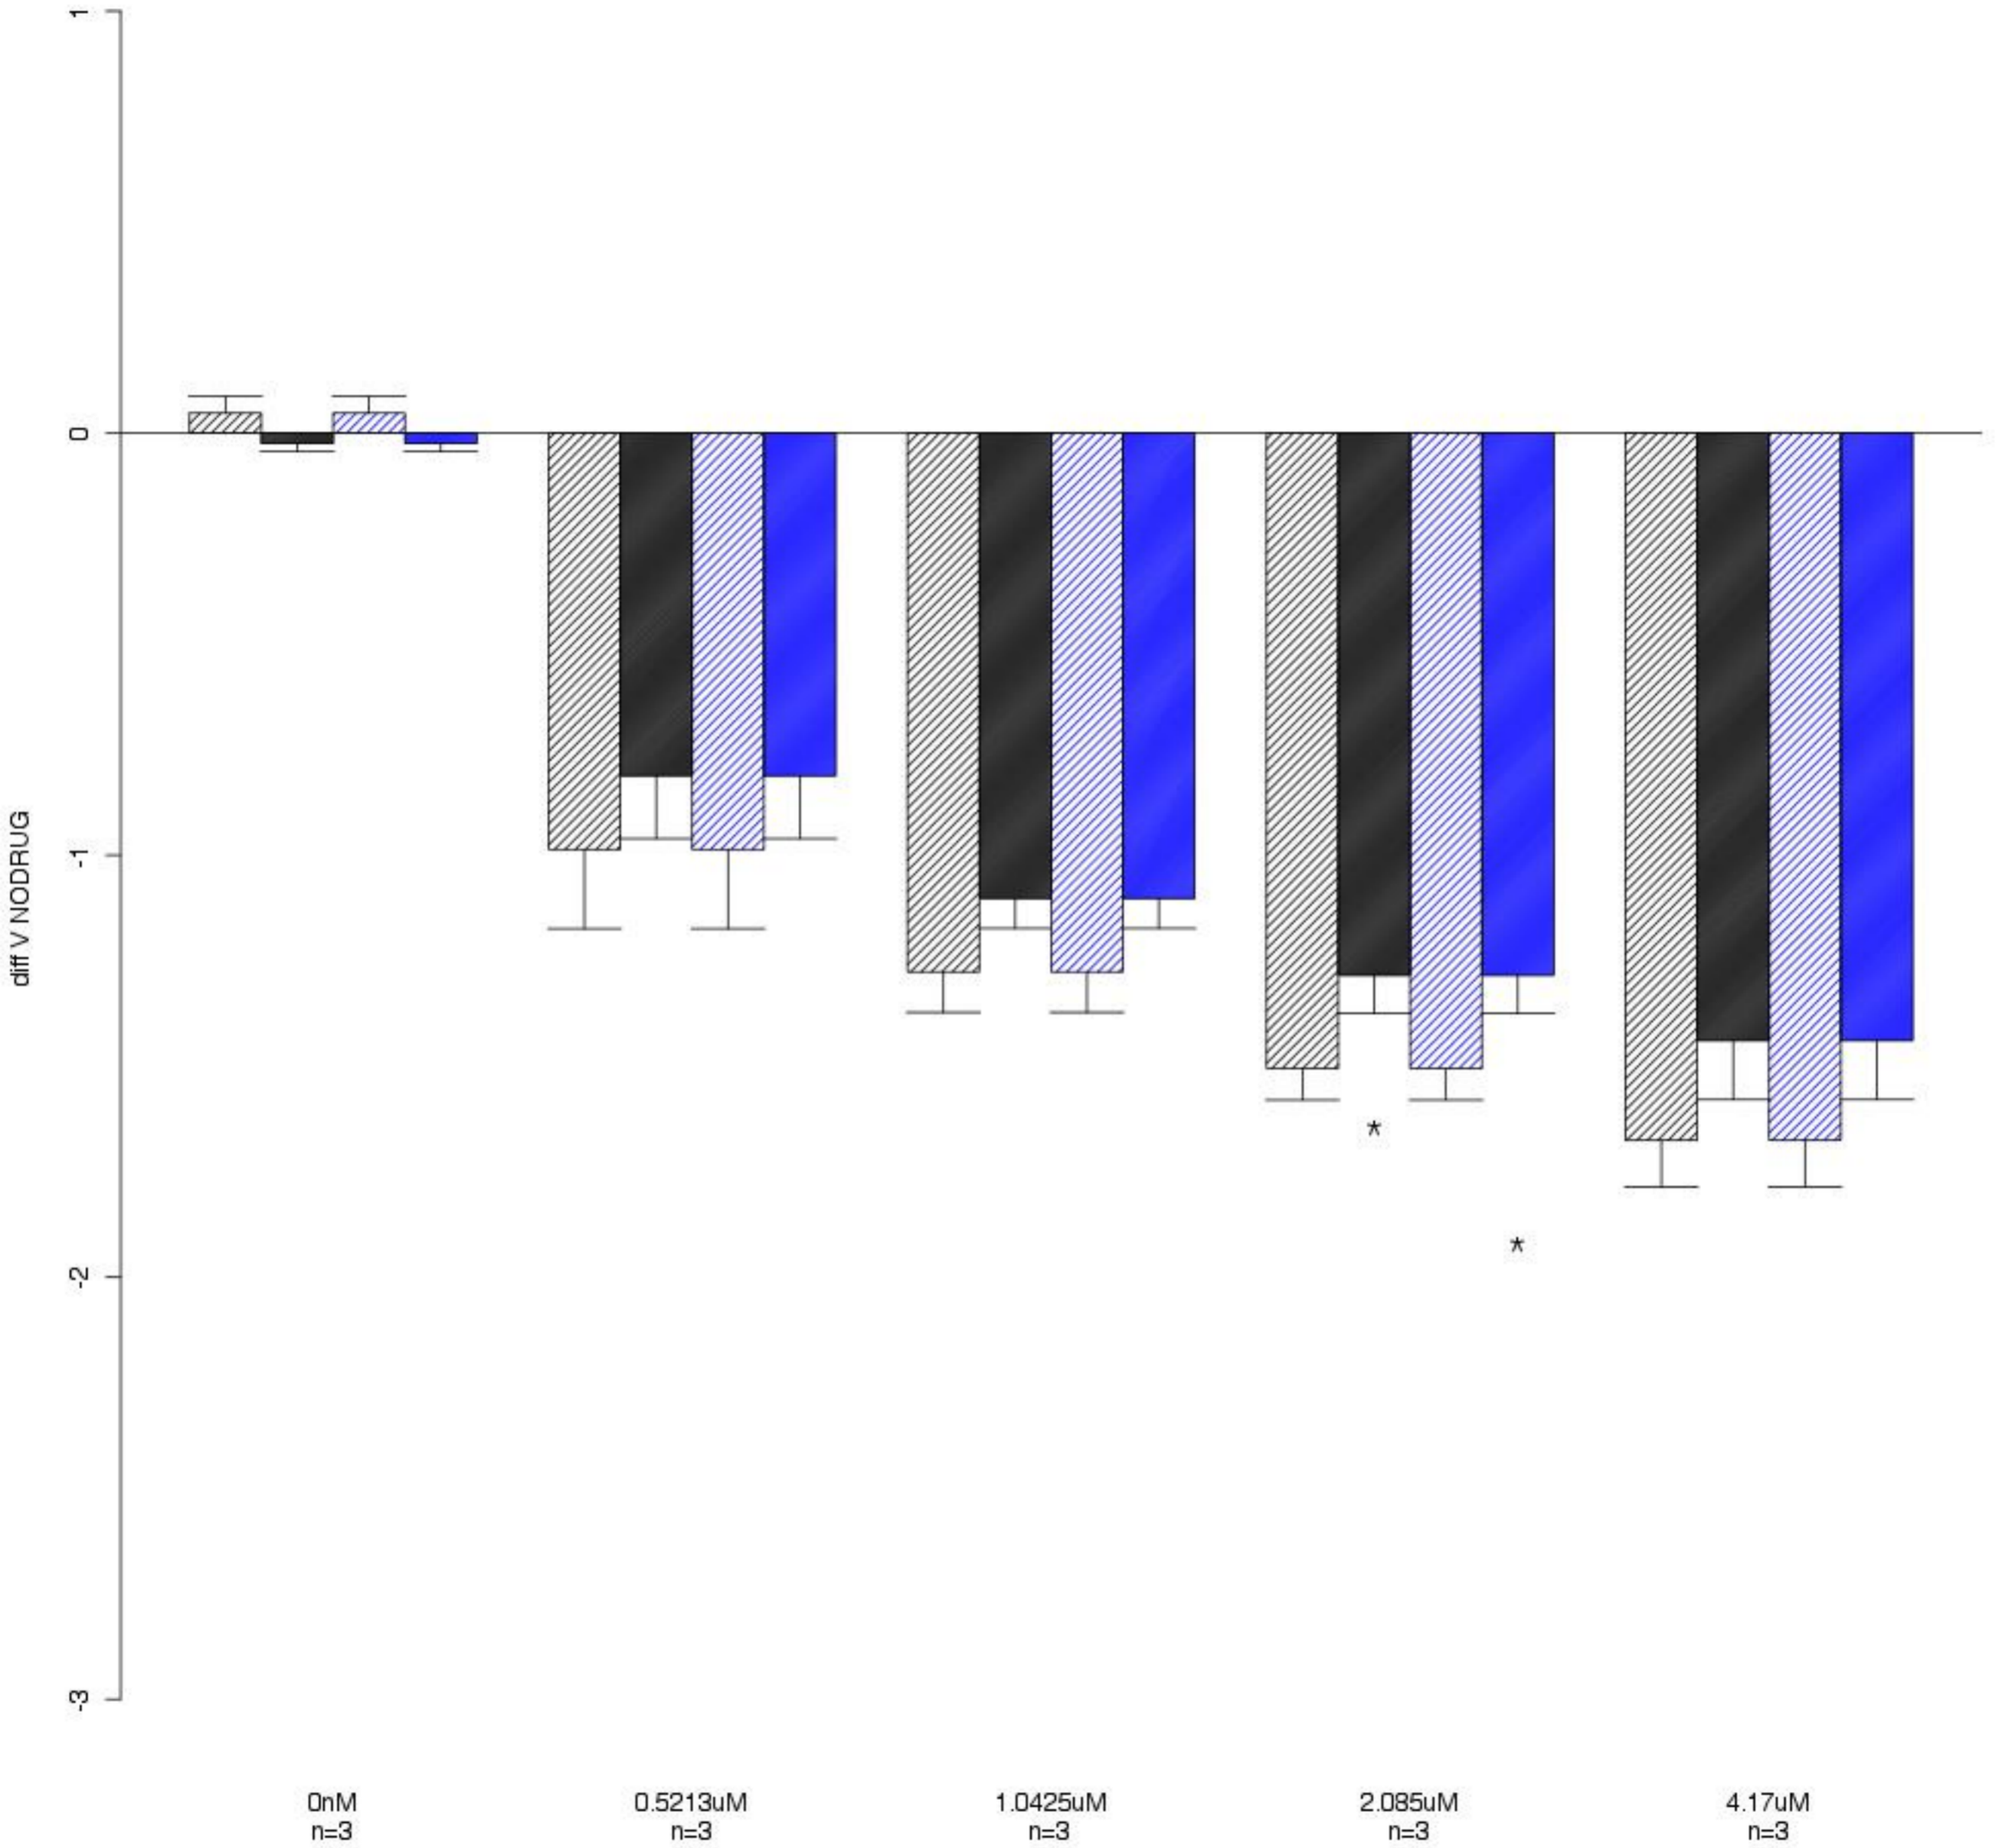

HEK293\_PT-ACRAMTU(EN)  
RHOXF2

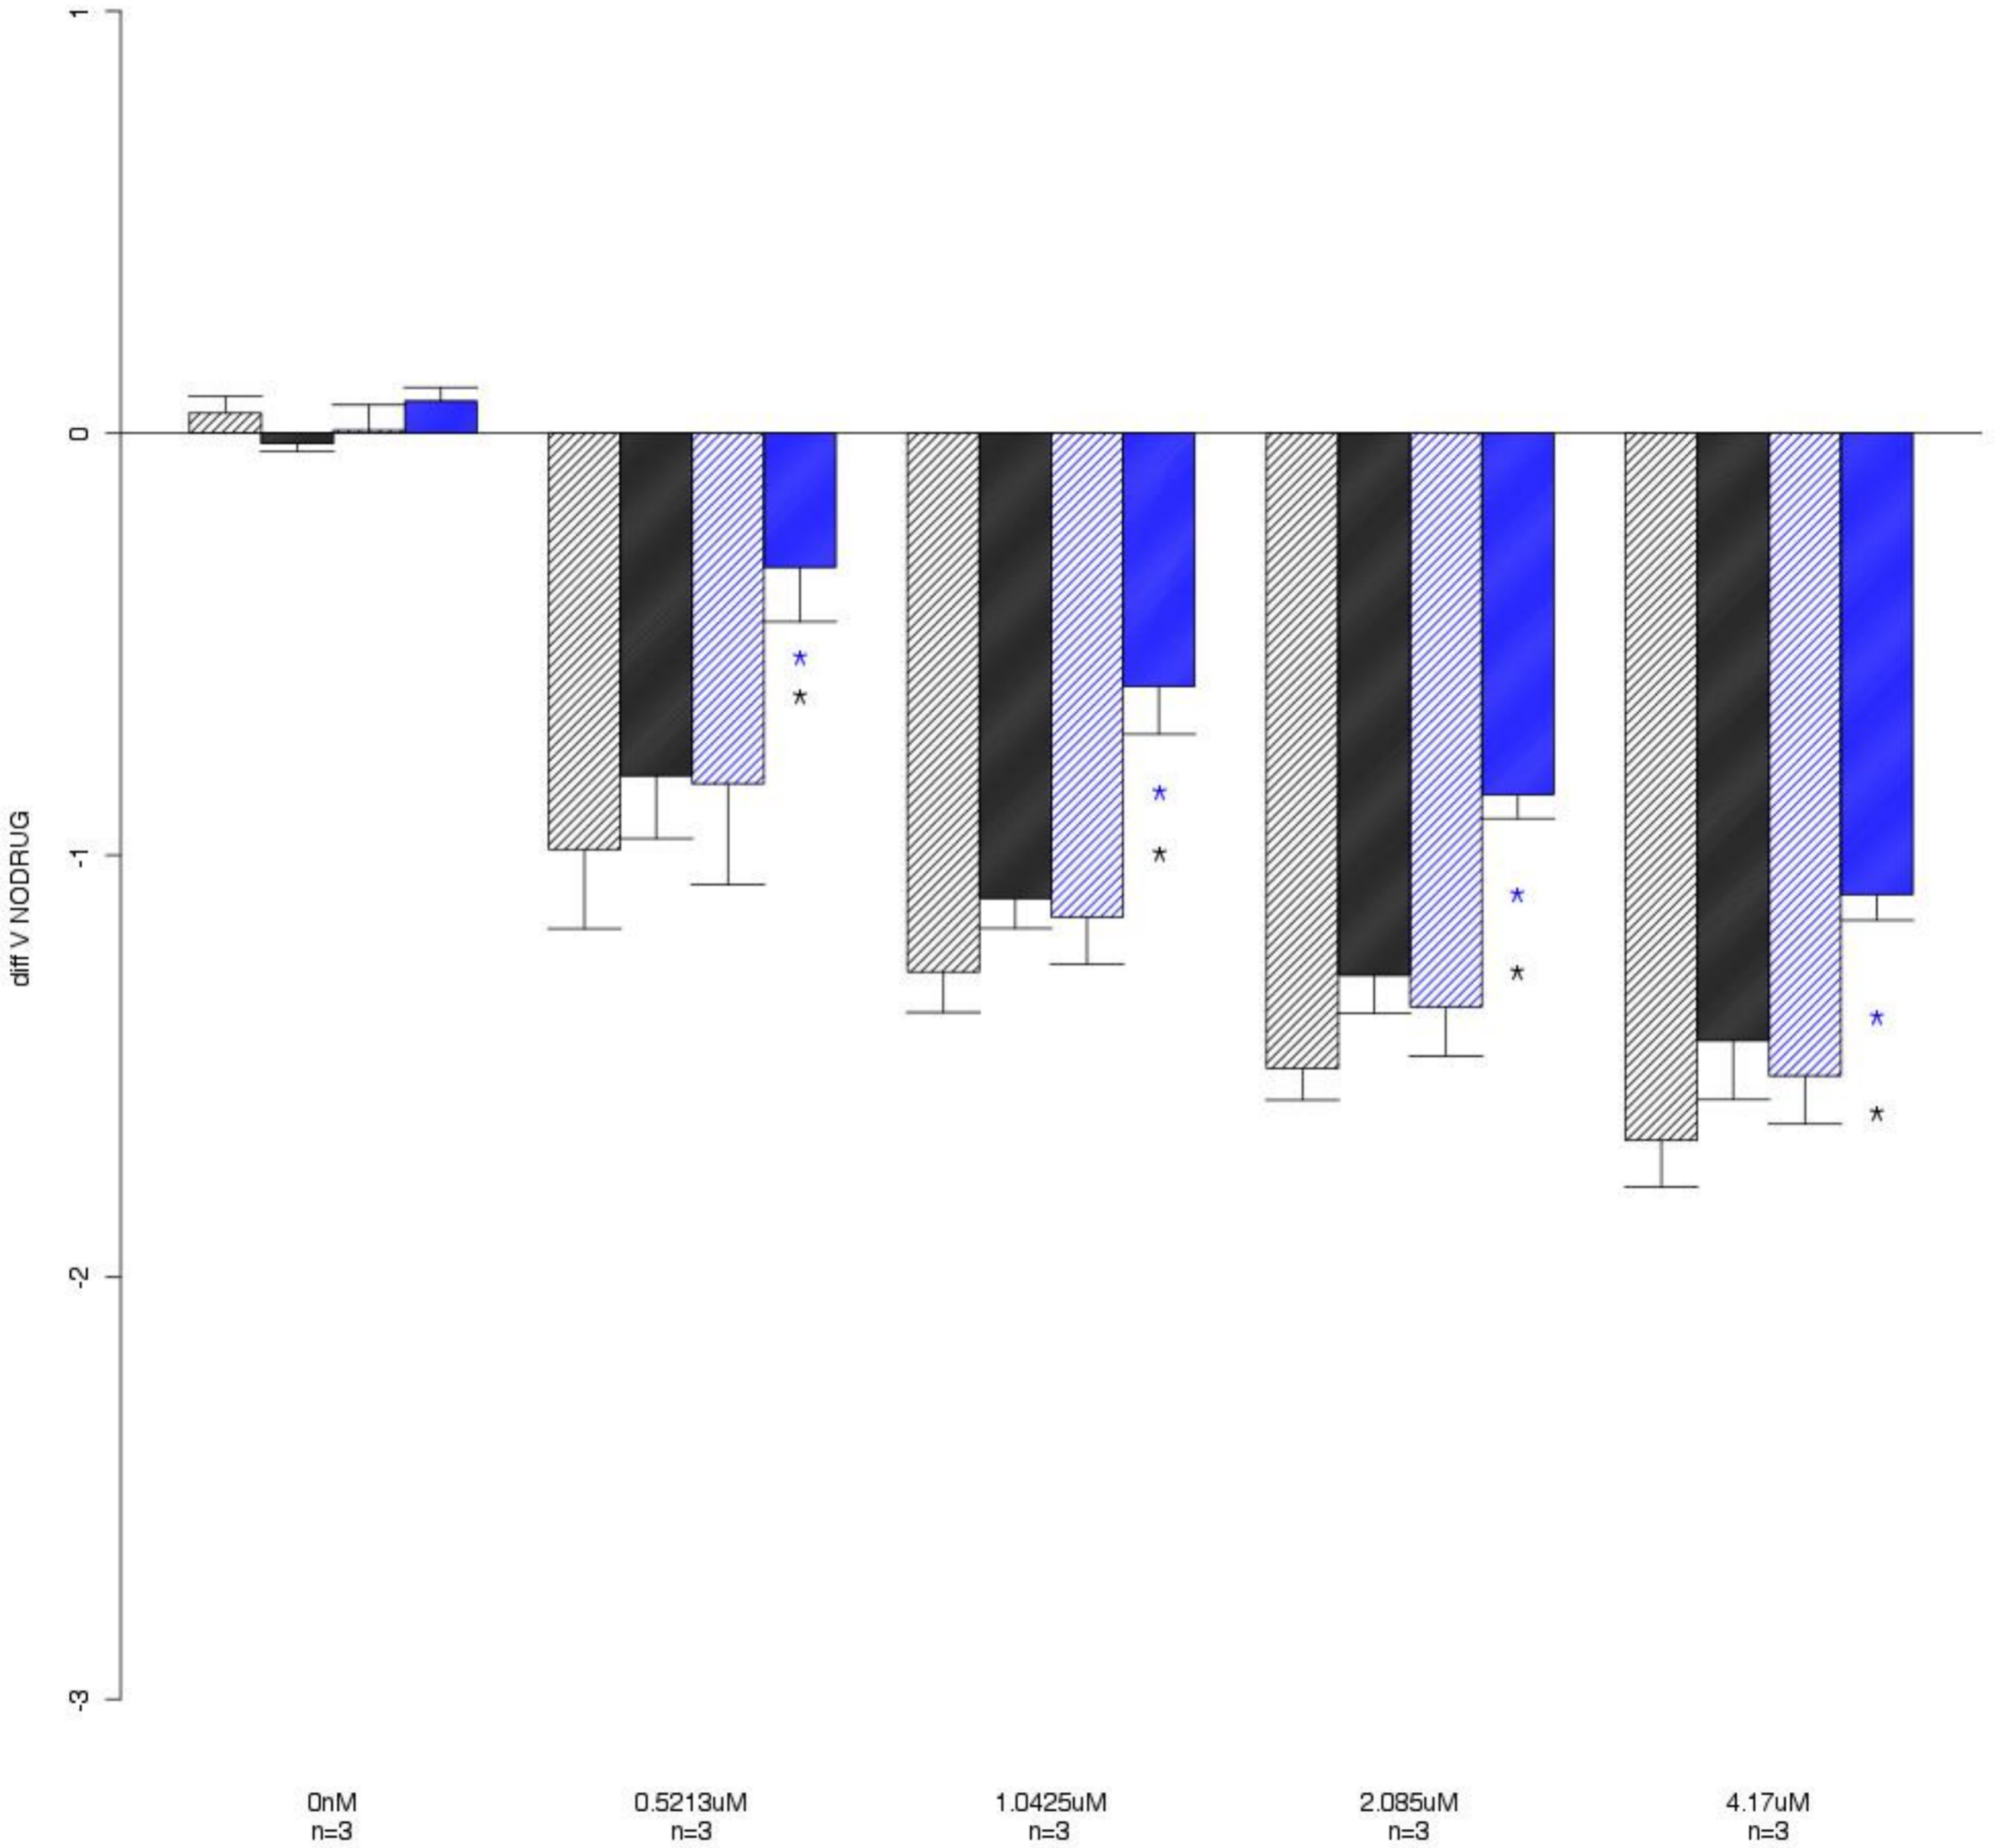

HEK293\_PT-ACRAMTU(PN)  
EV

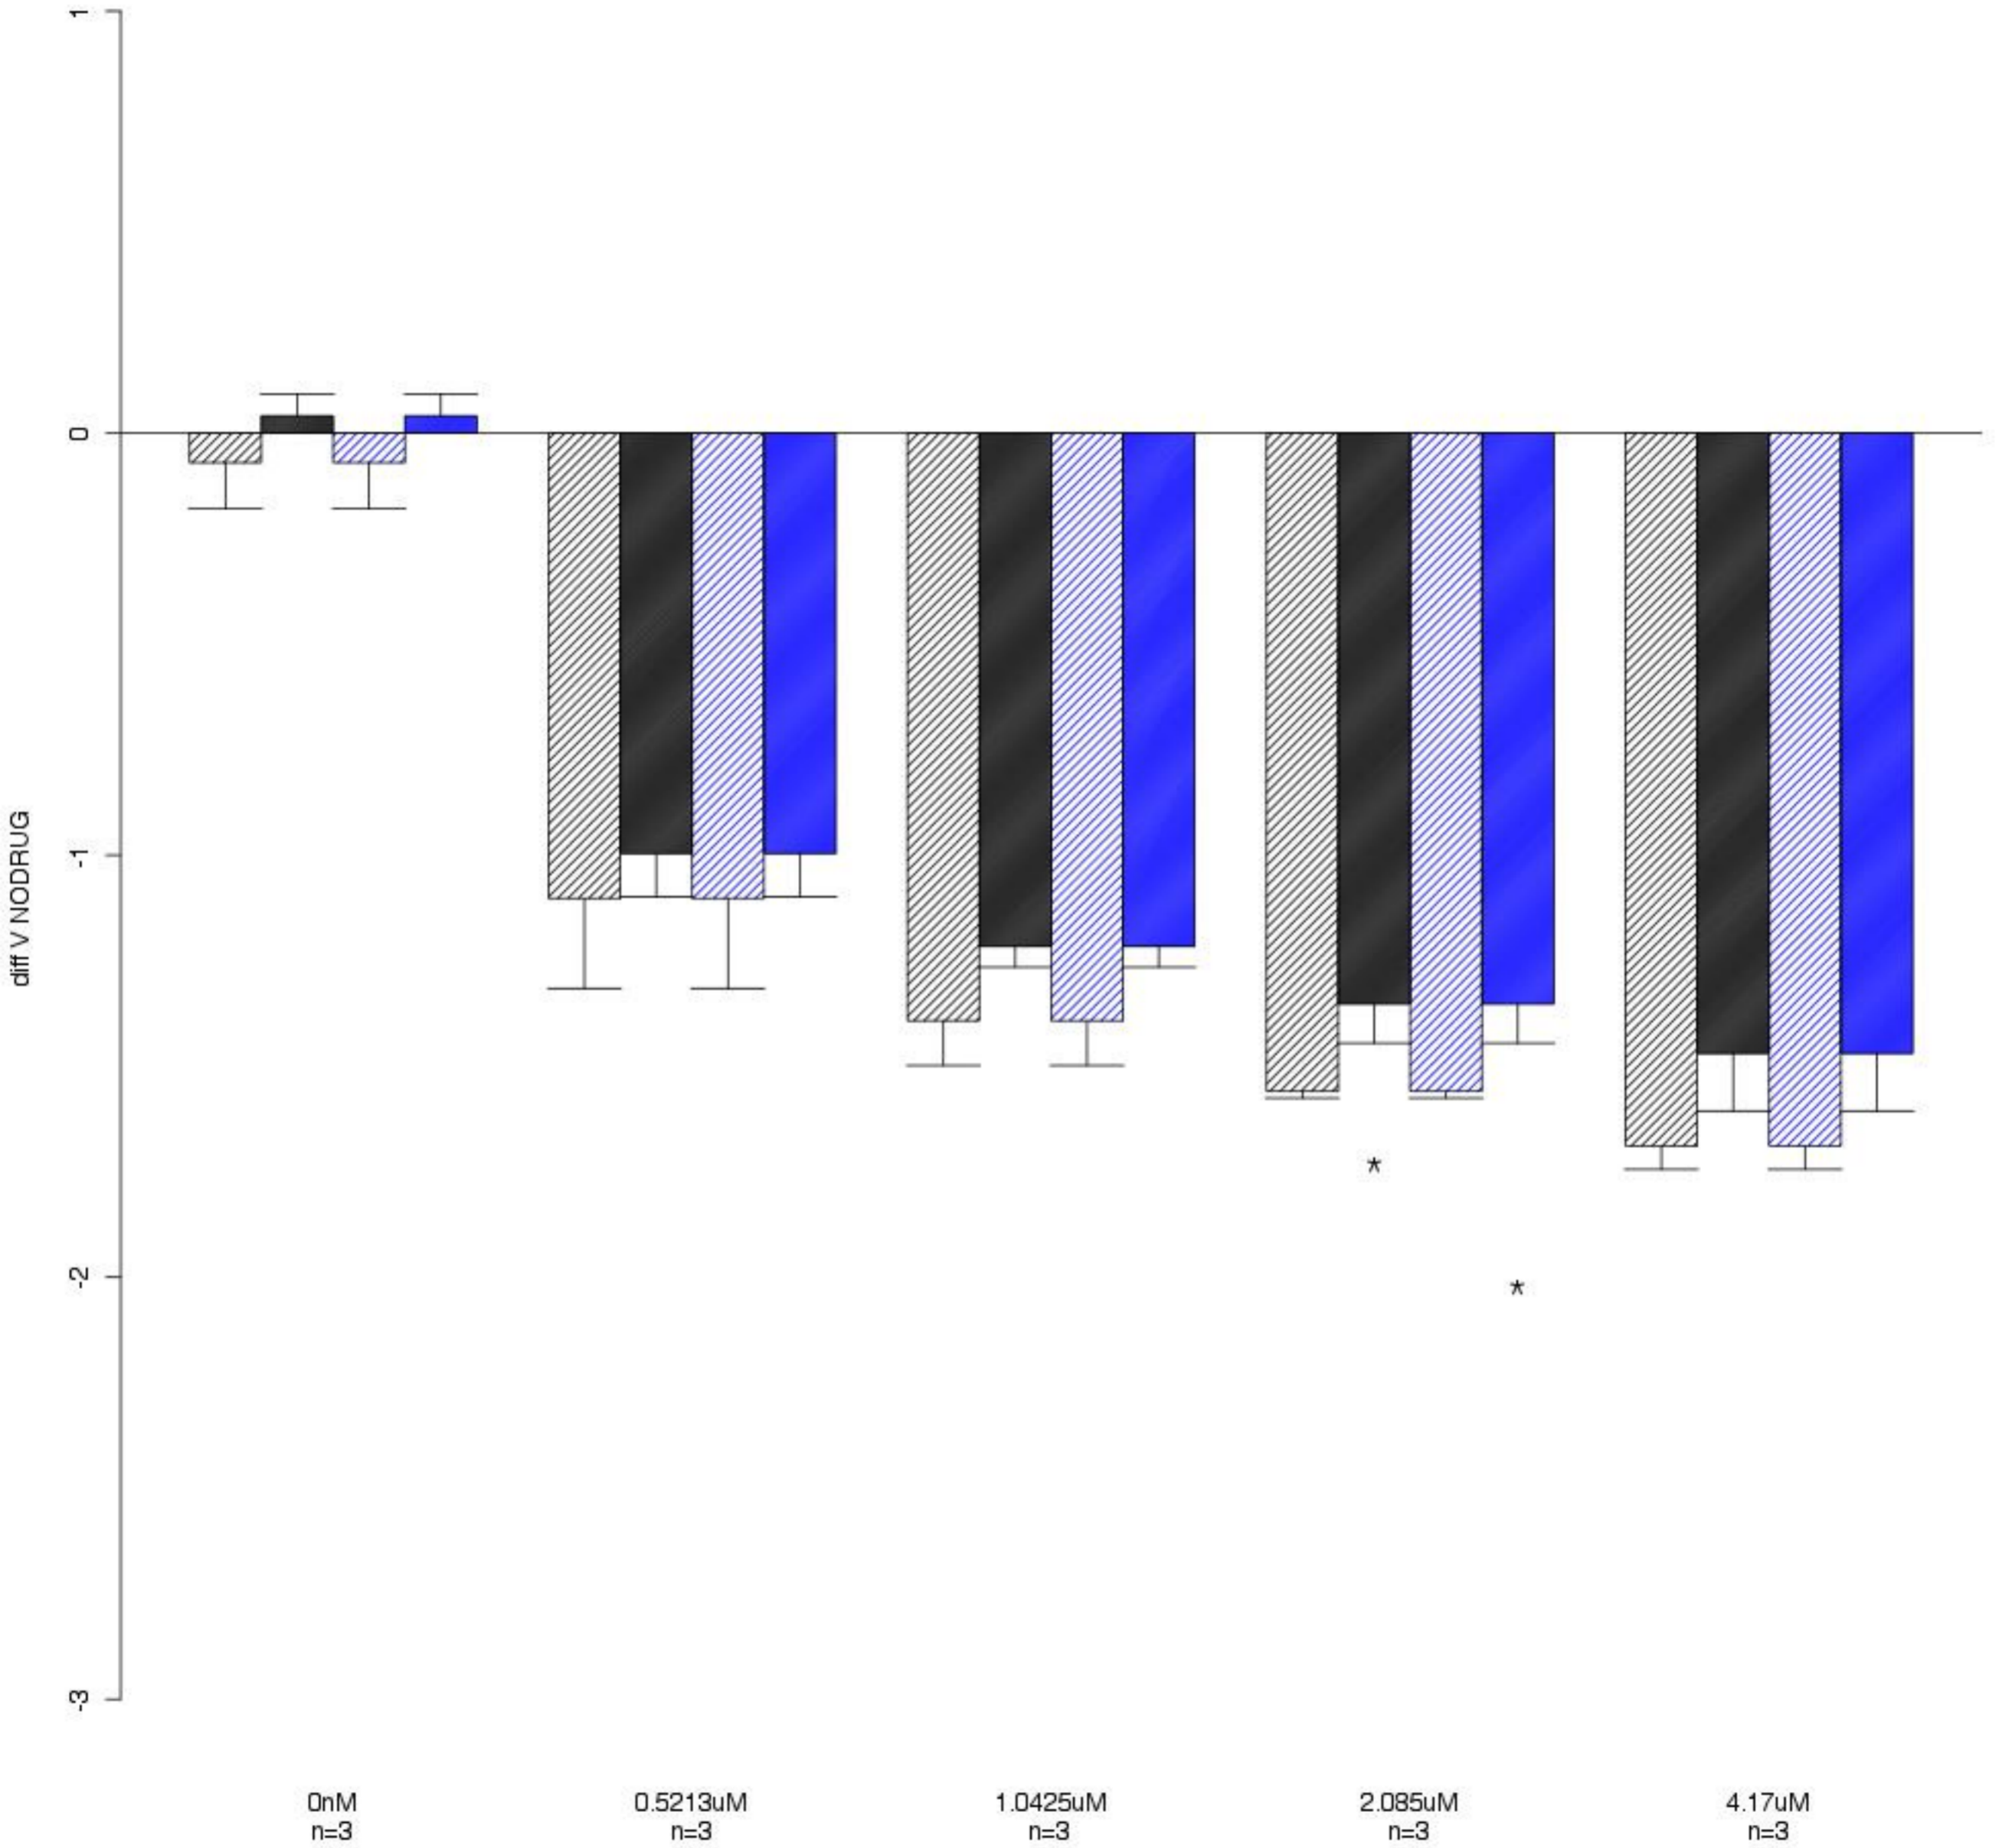

HEK293\_PT-ACRAMTU(PN)  
RHOXF2

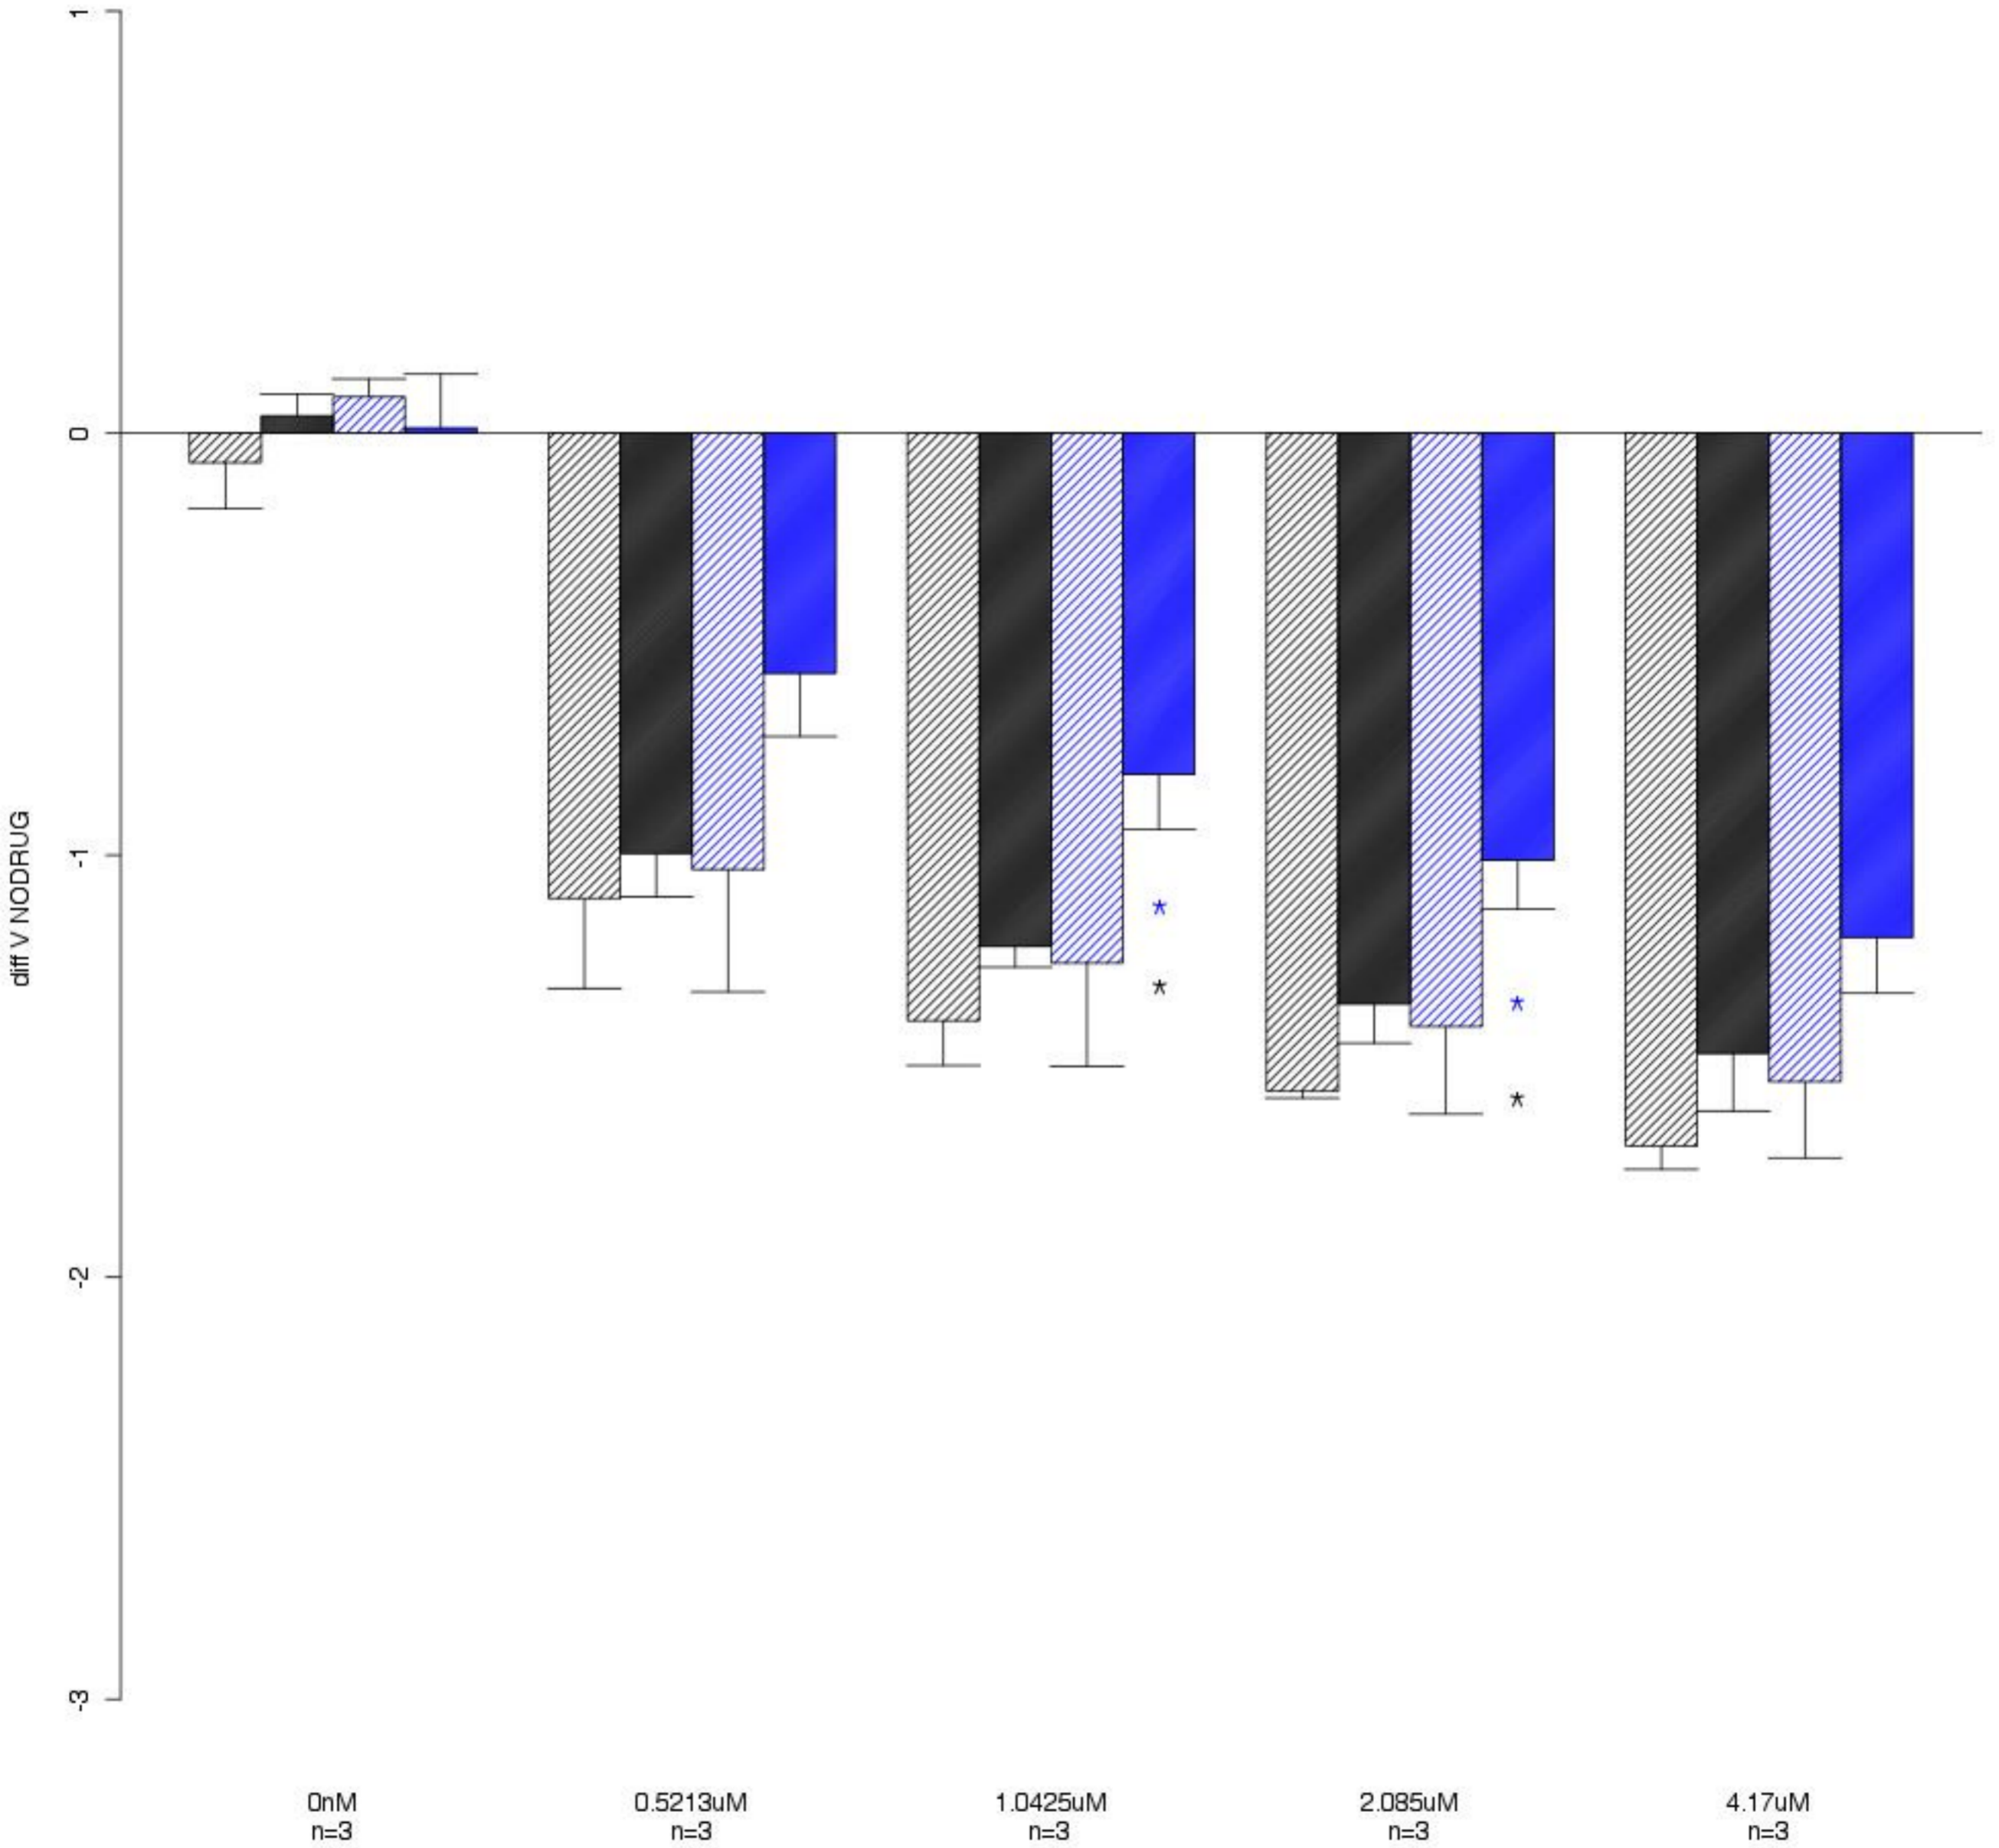

HEK293\_PT-AMIDIN  
EV

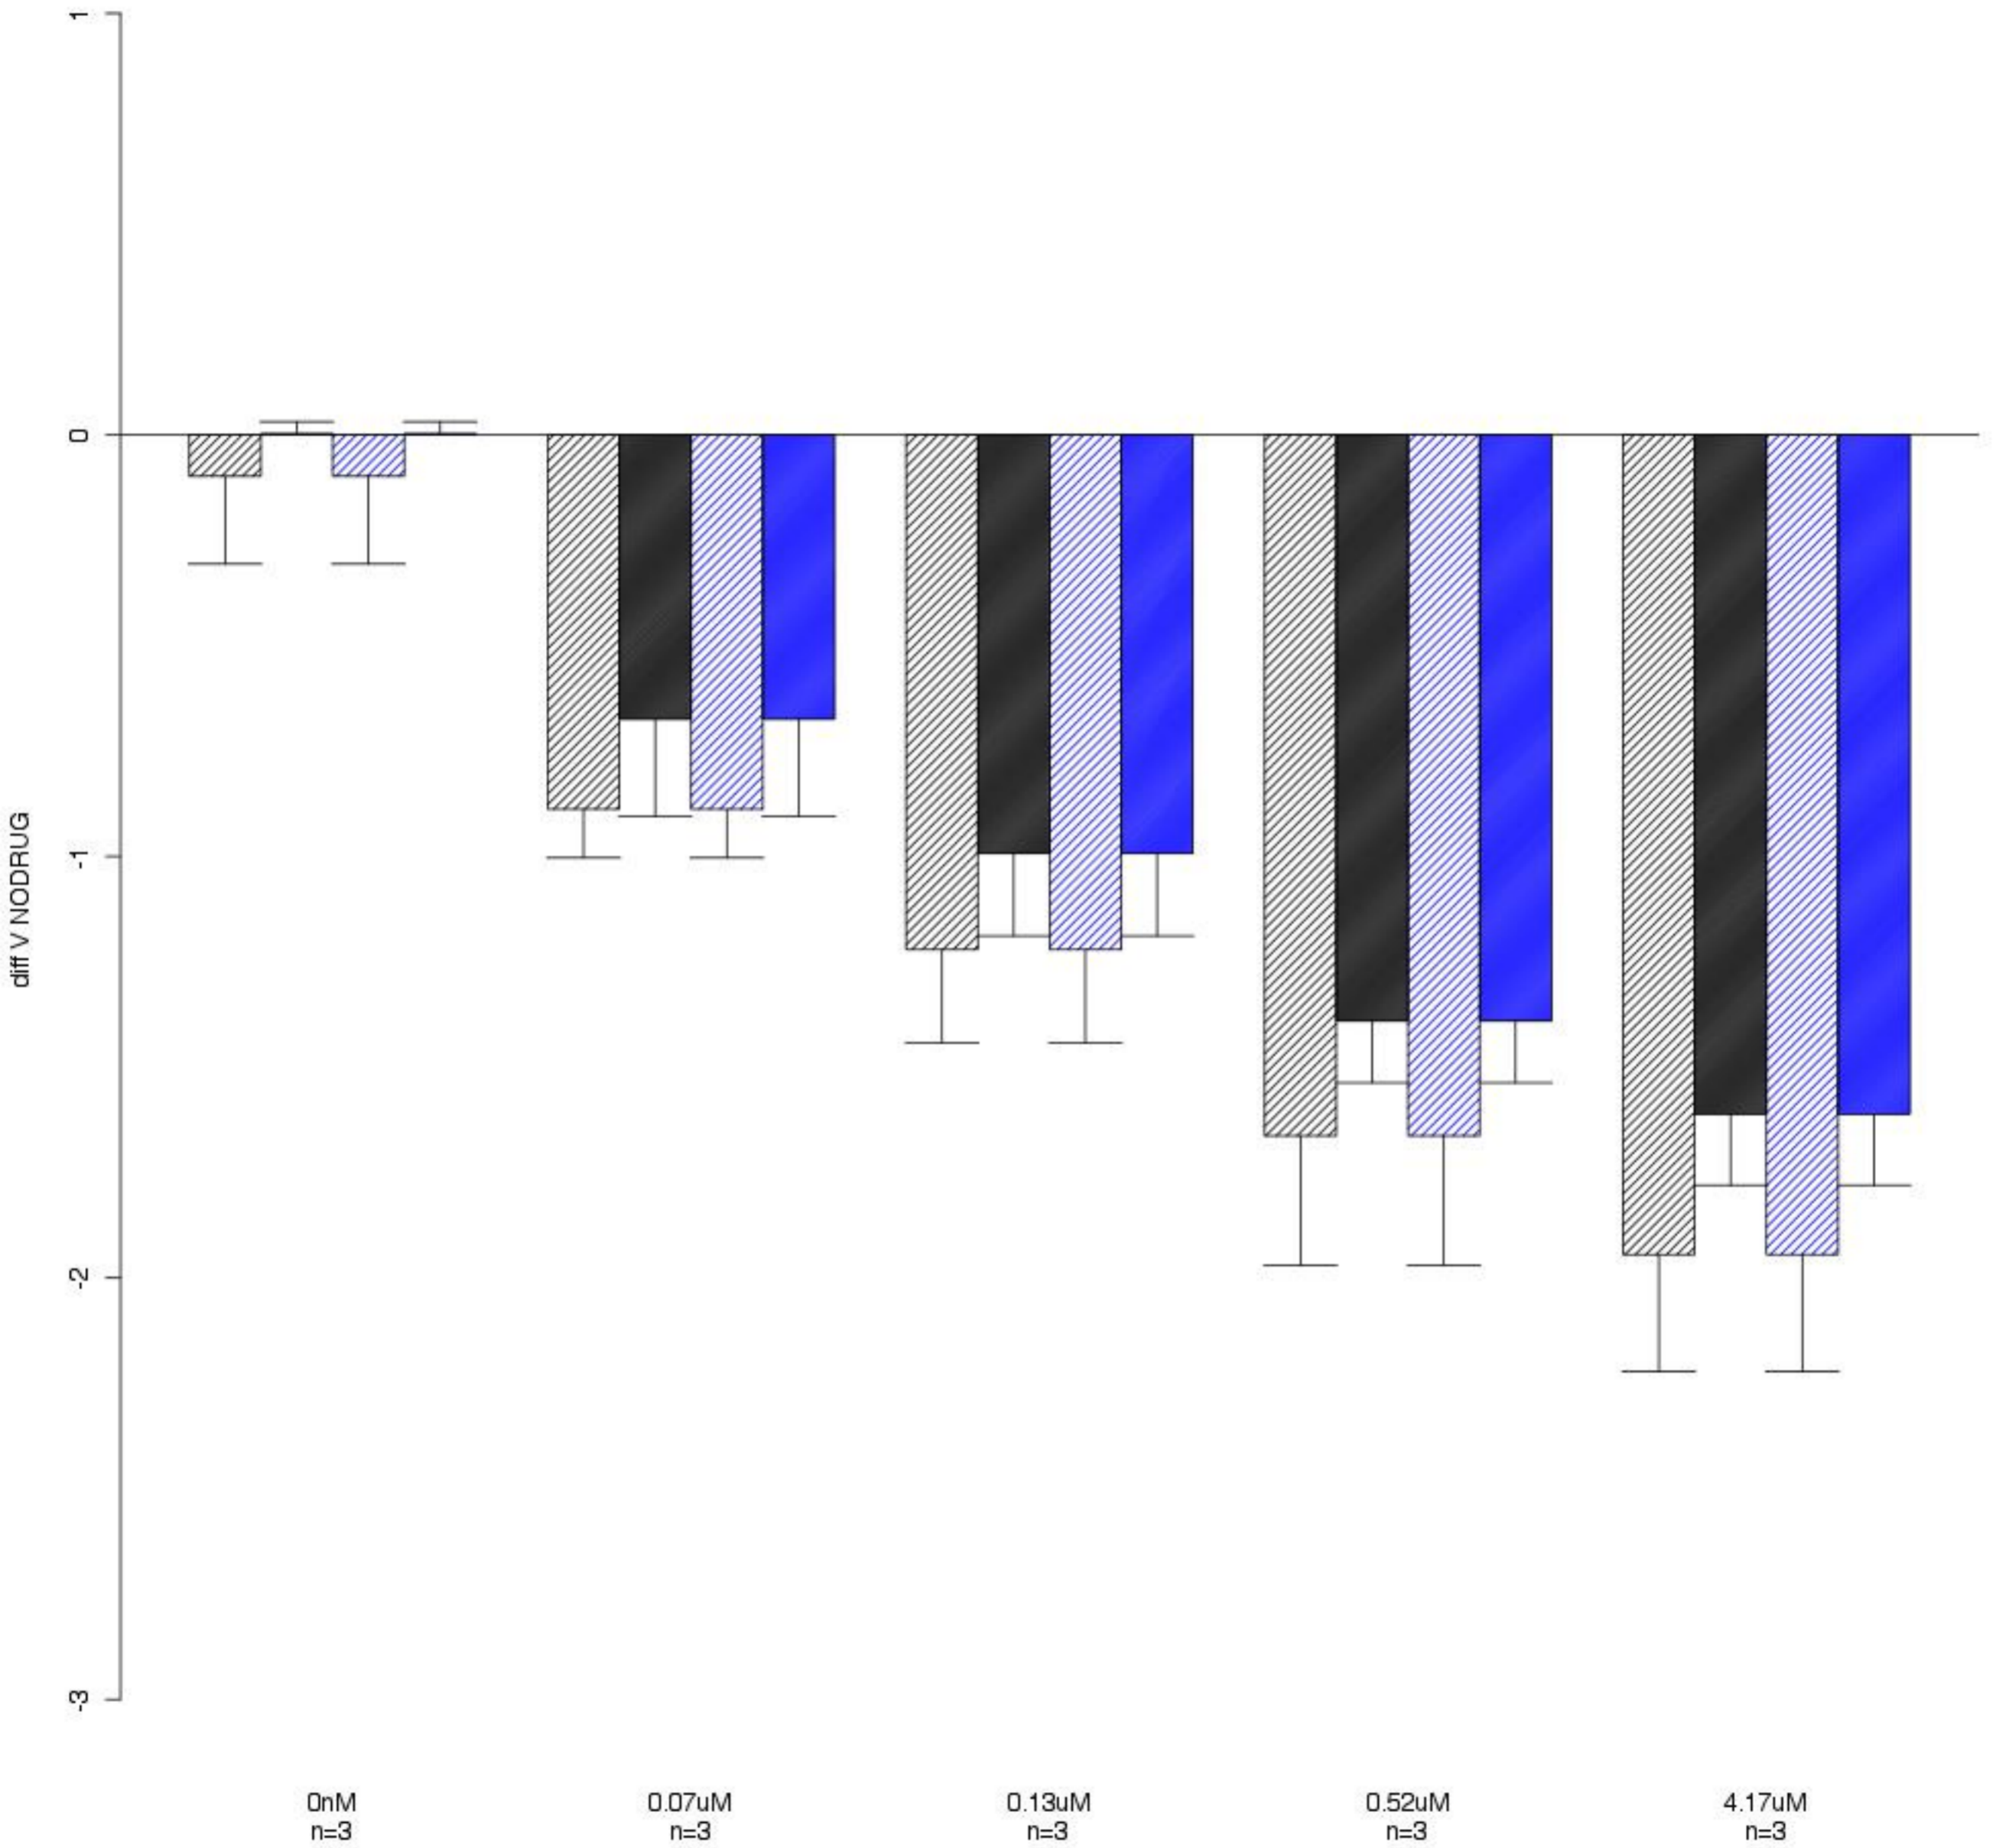

HEK293\_PT-AMIDIN  
RHOXF2

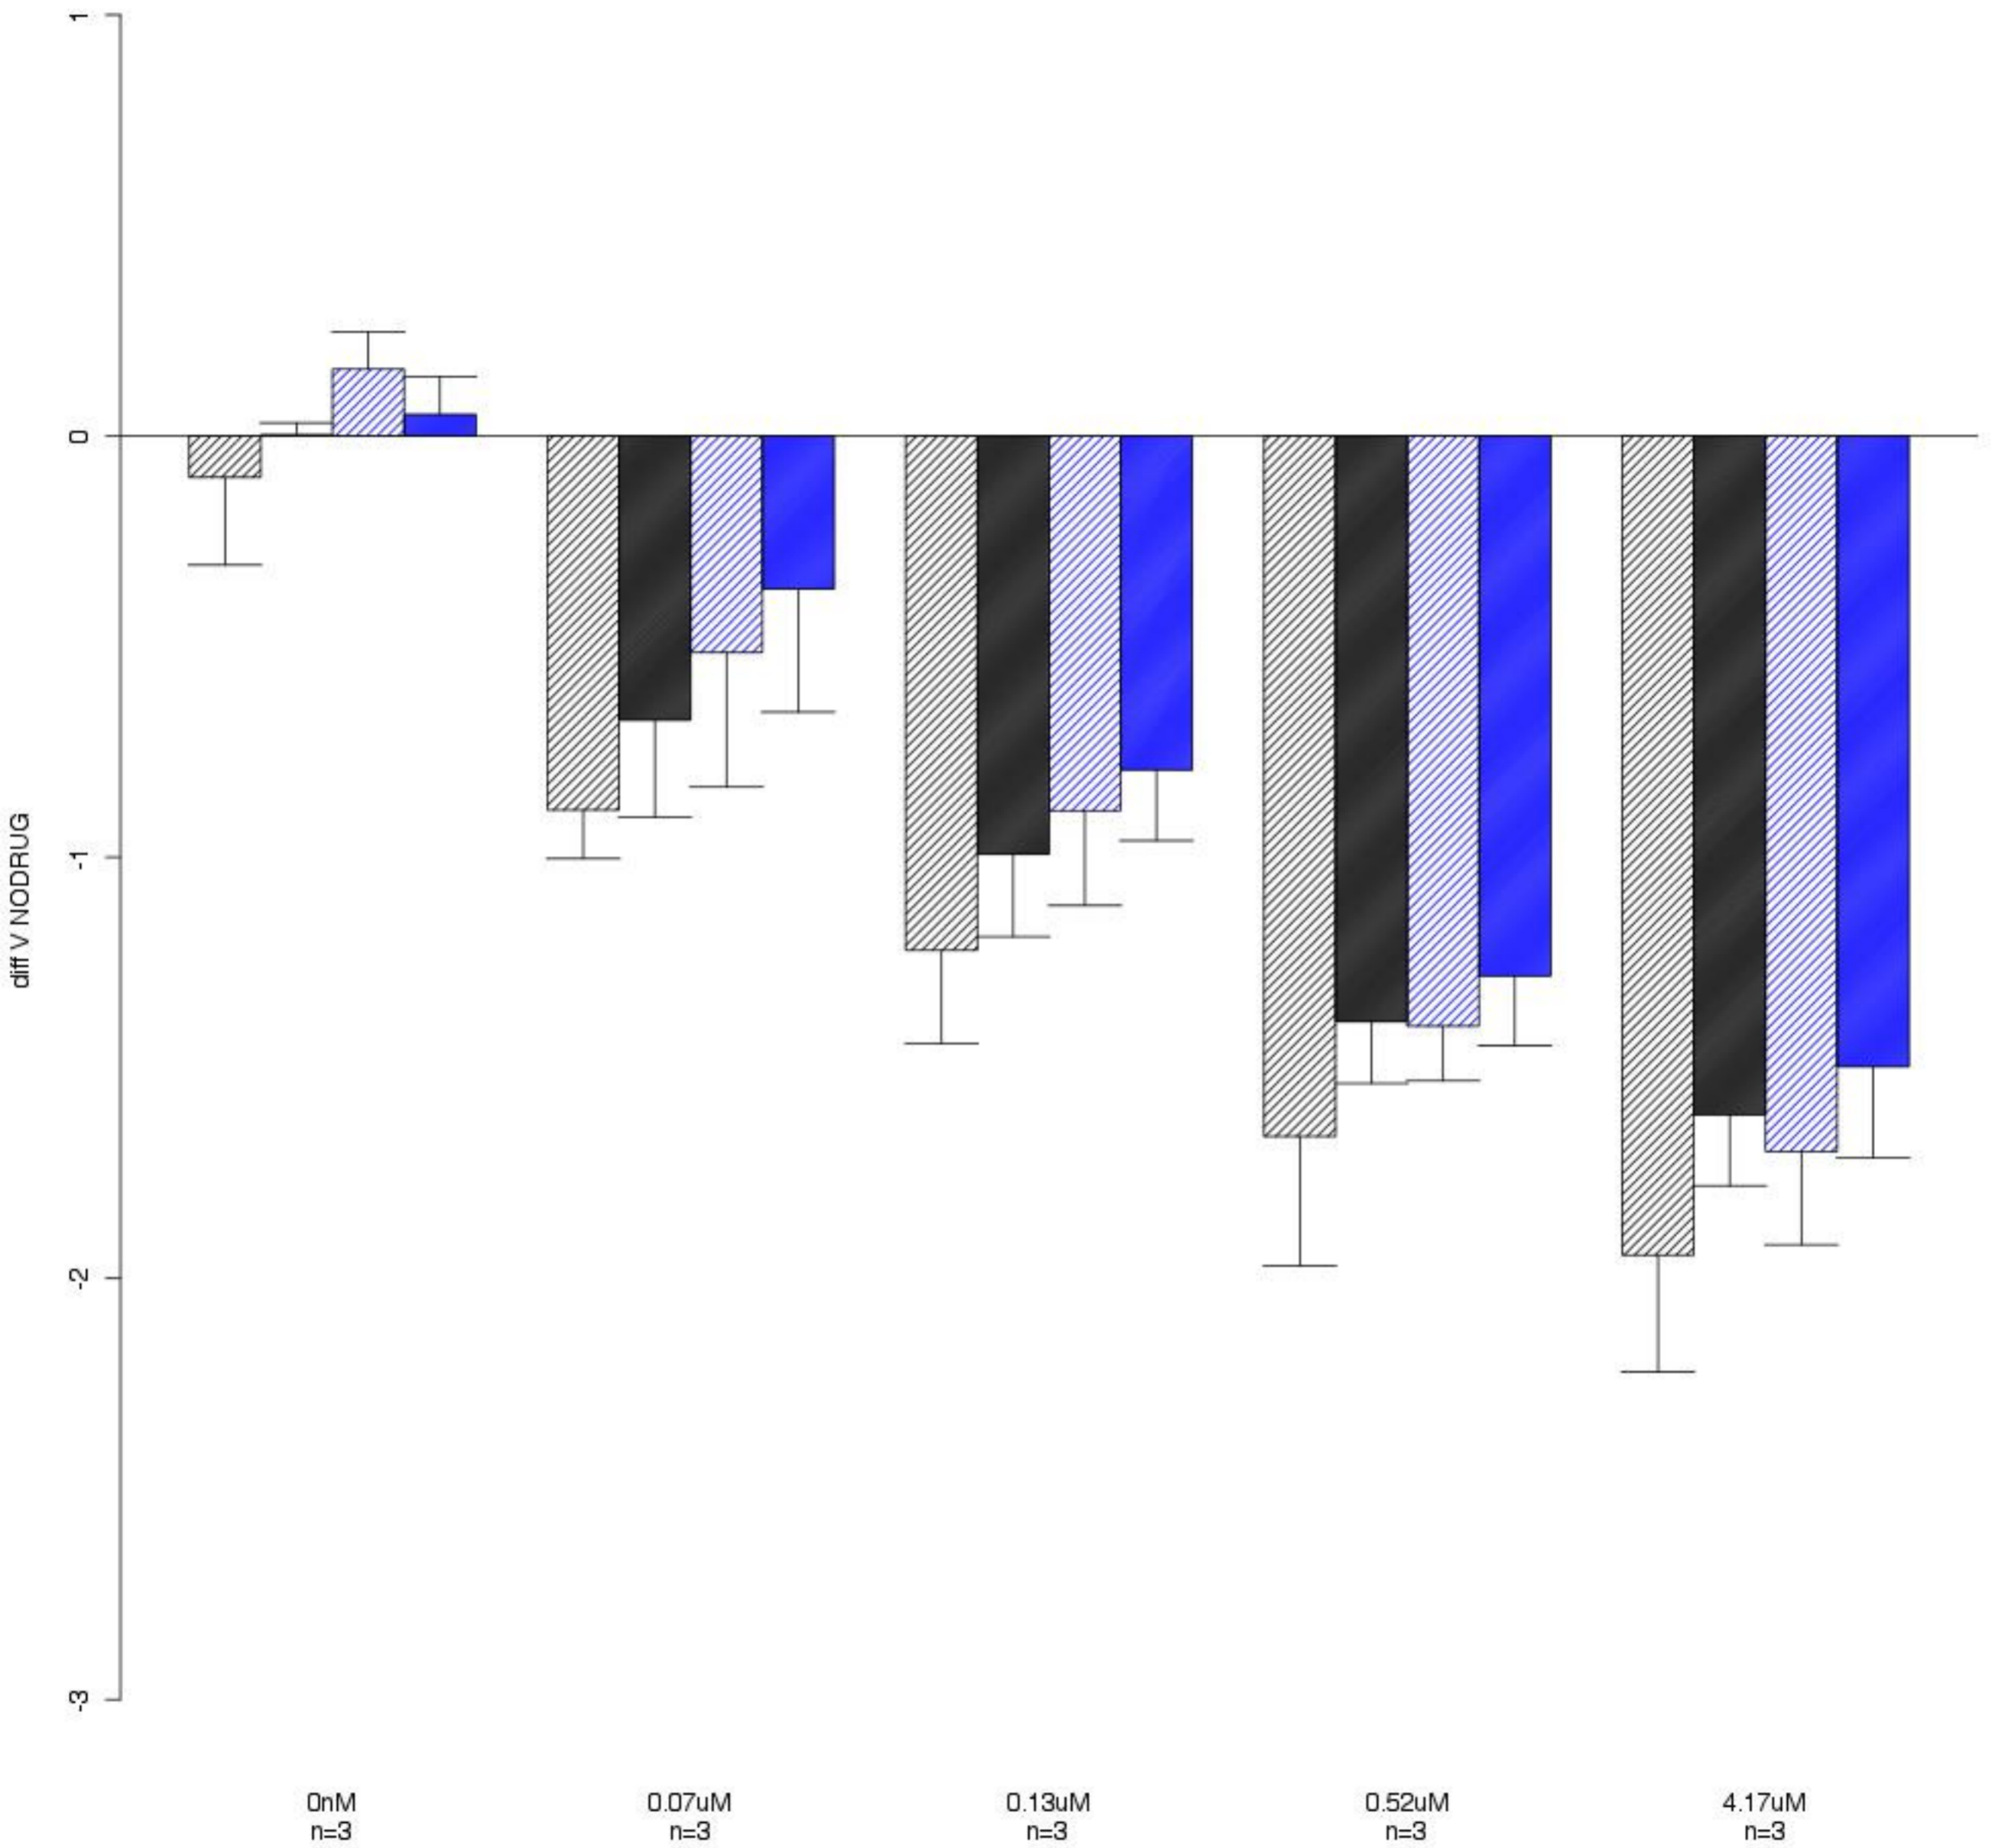



HEK293\_PT-ATUCA  
EV

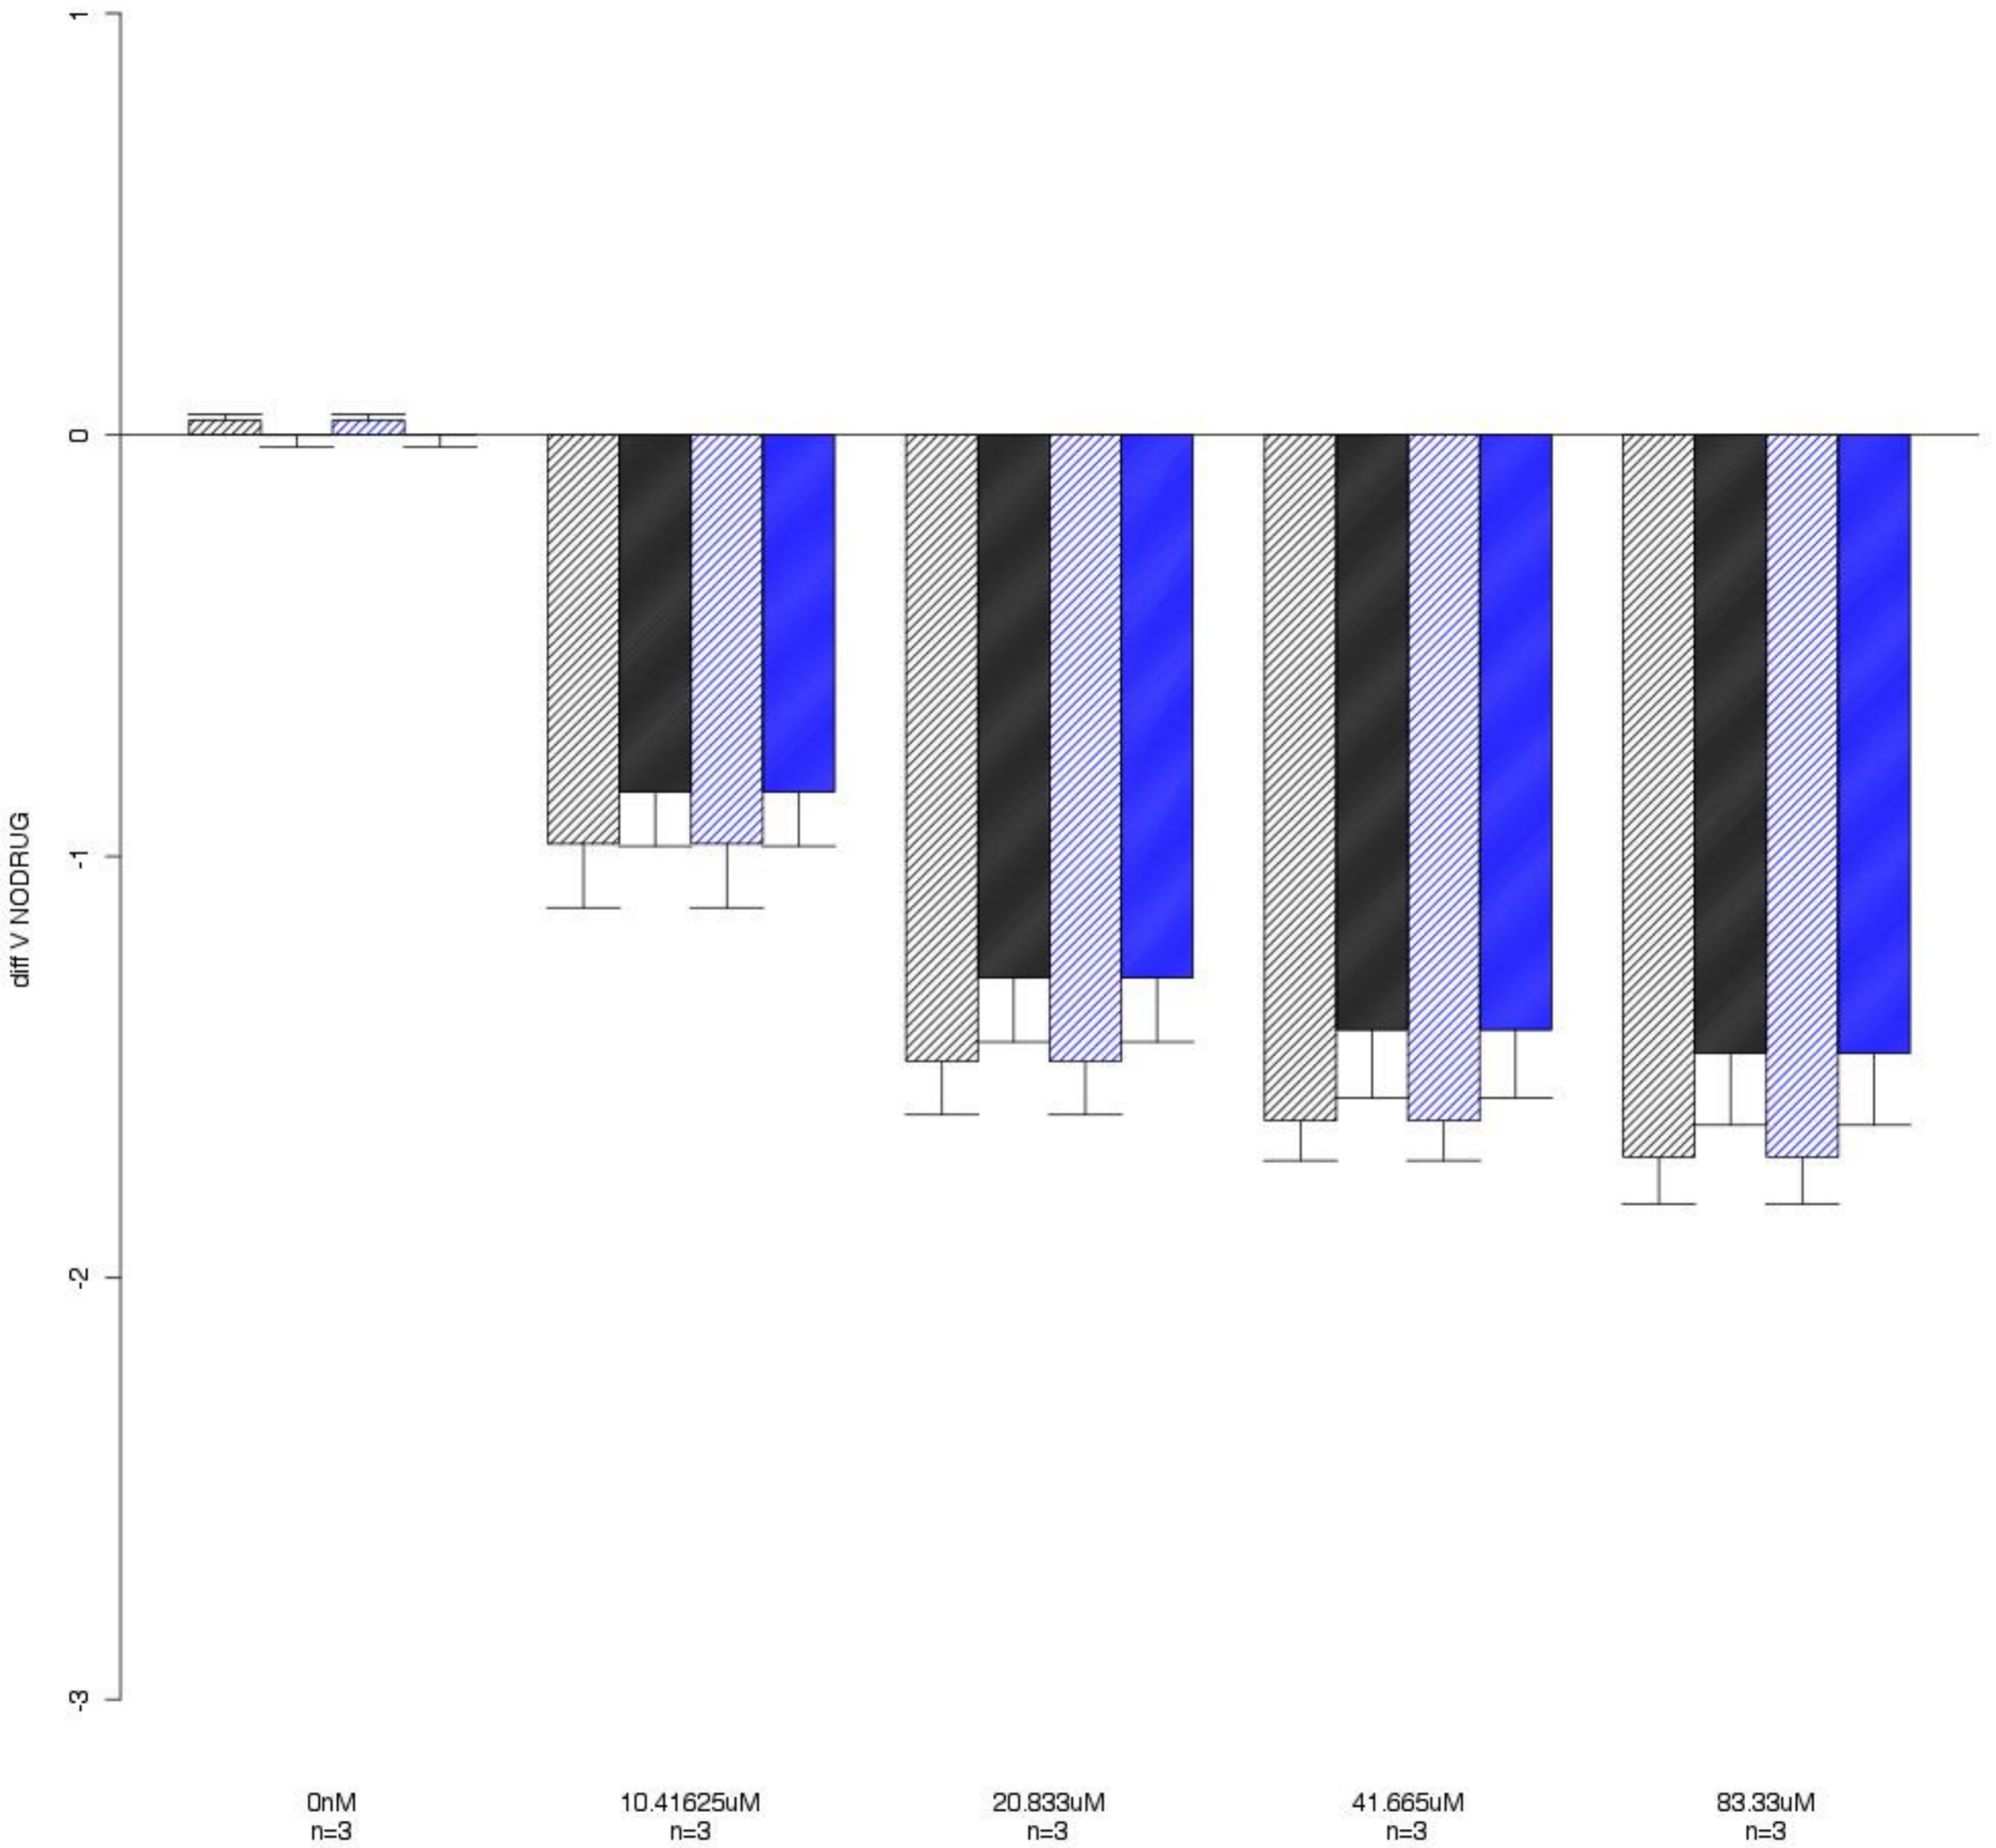

HEK293\_PT-ATUCA  
RHOXF2

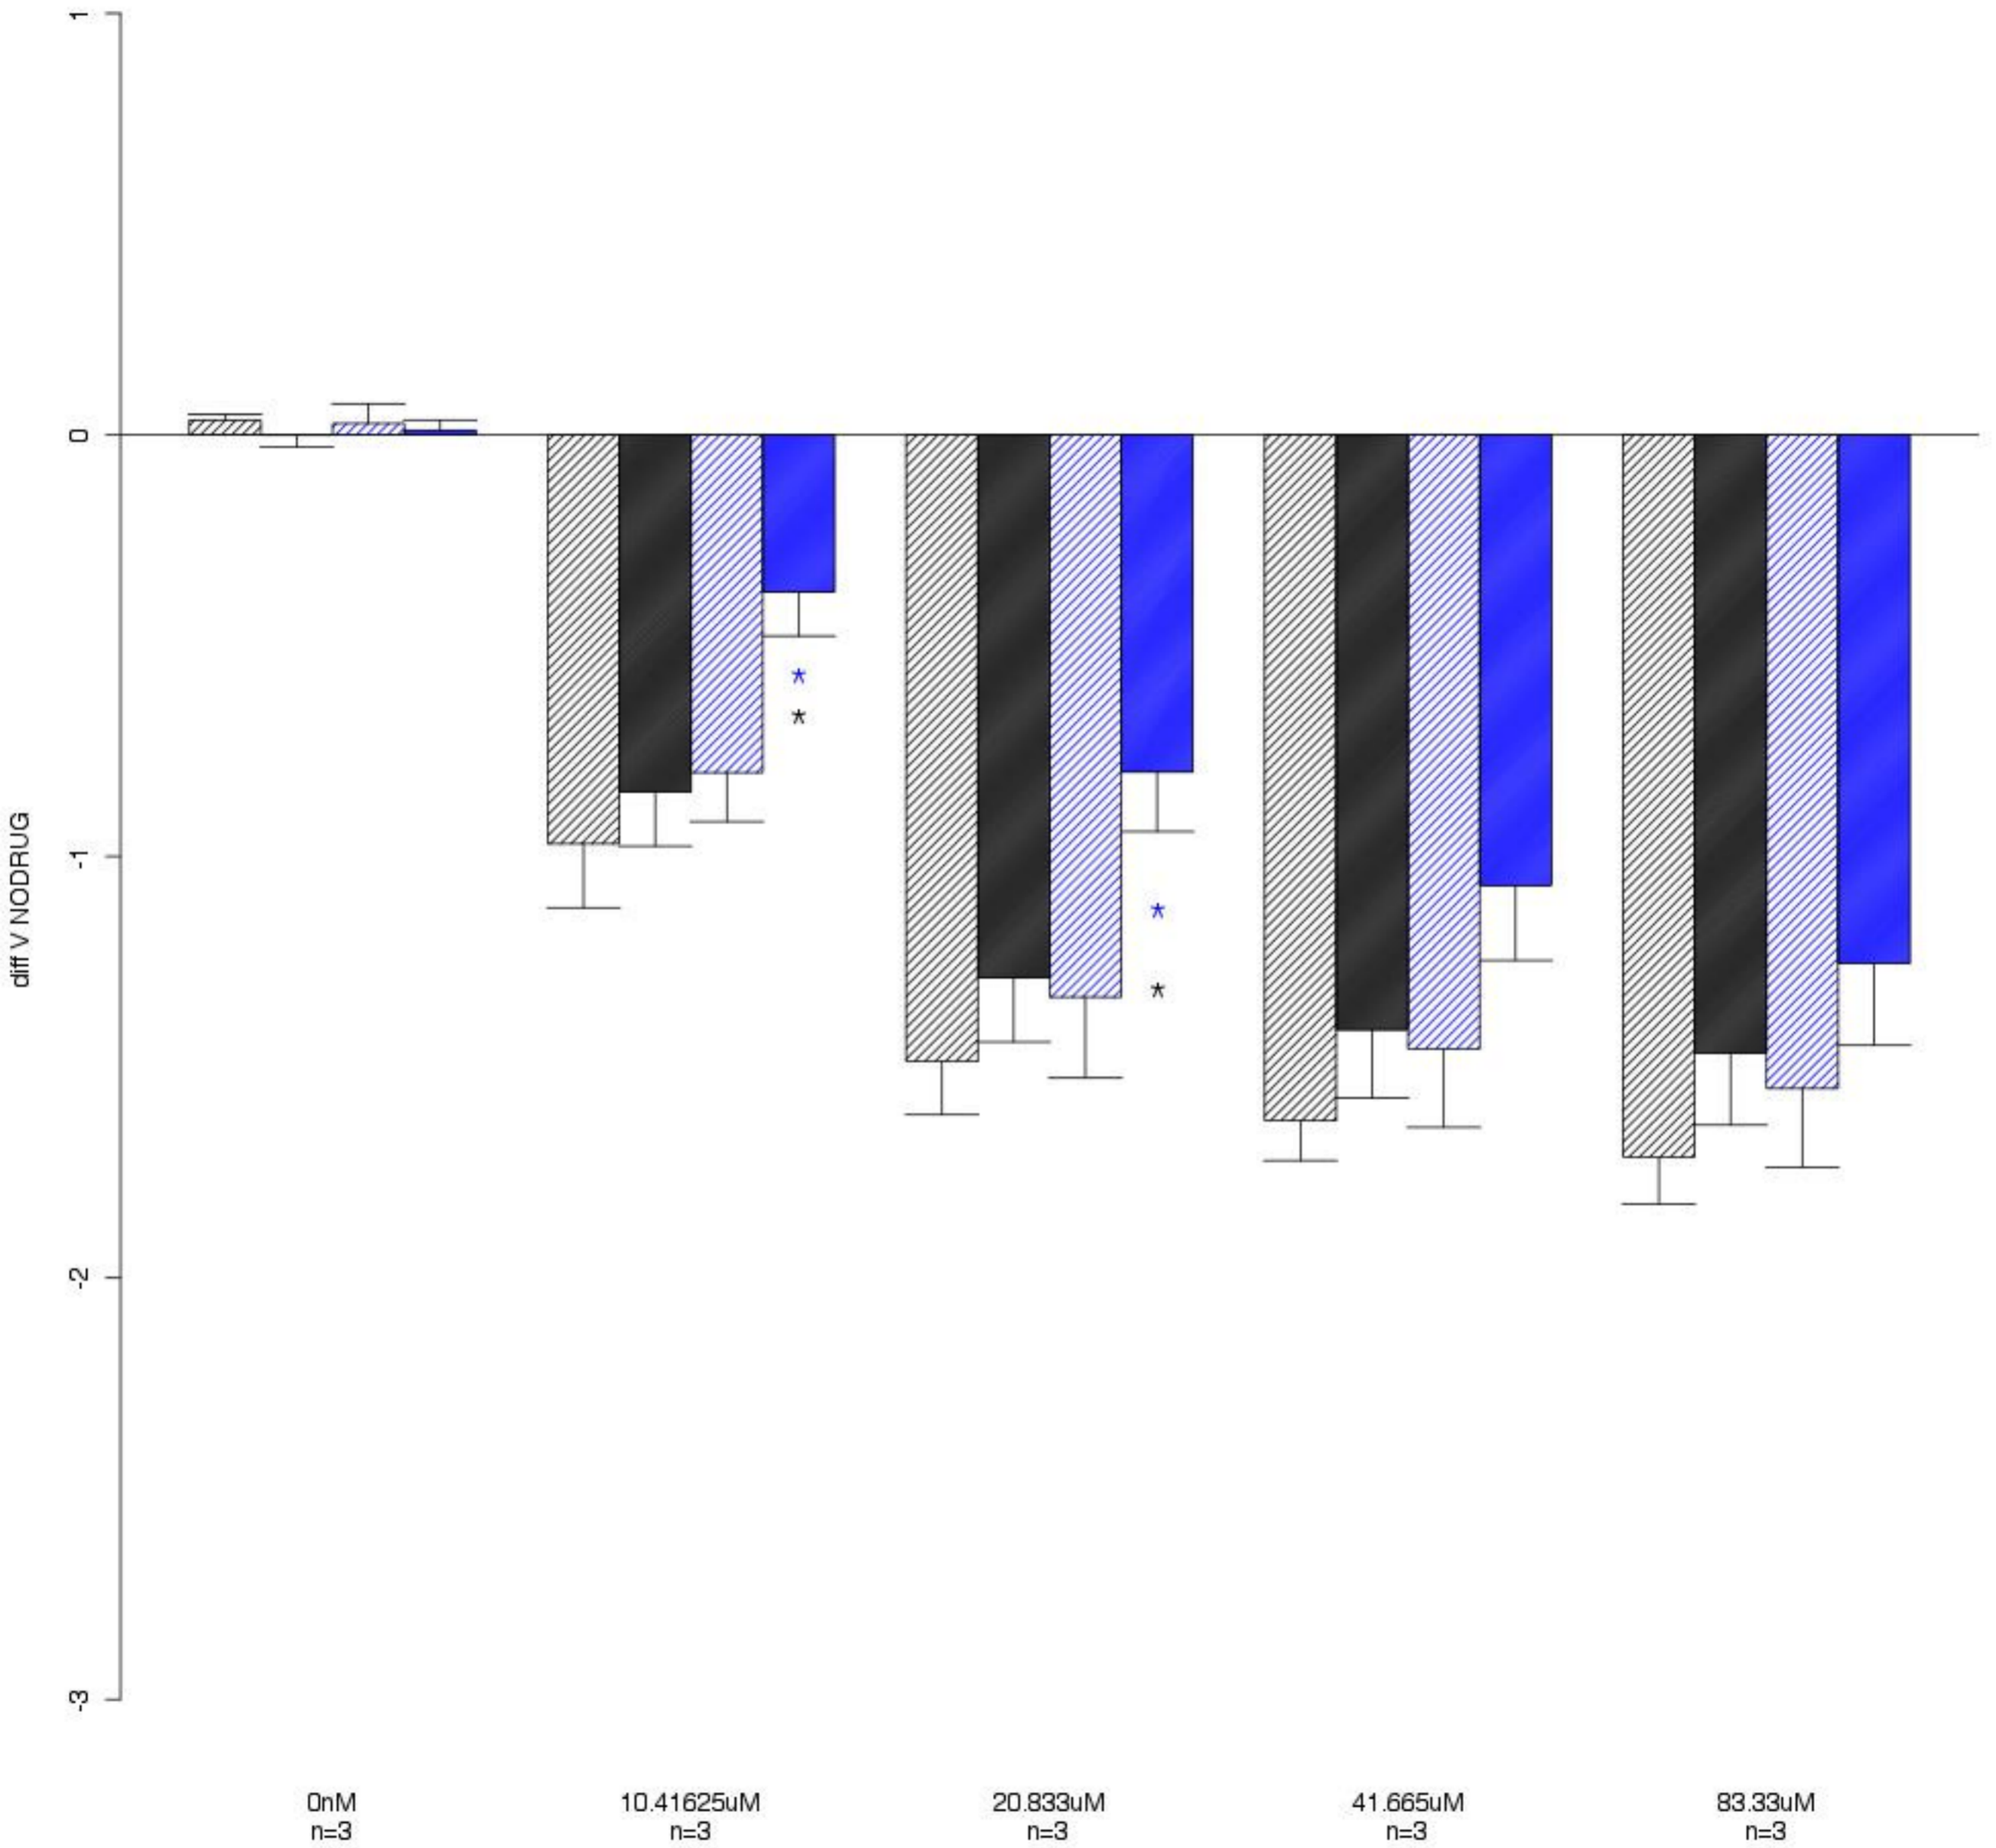

HEK293\_Pyrodach-4  
EV

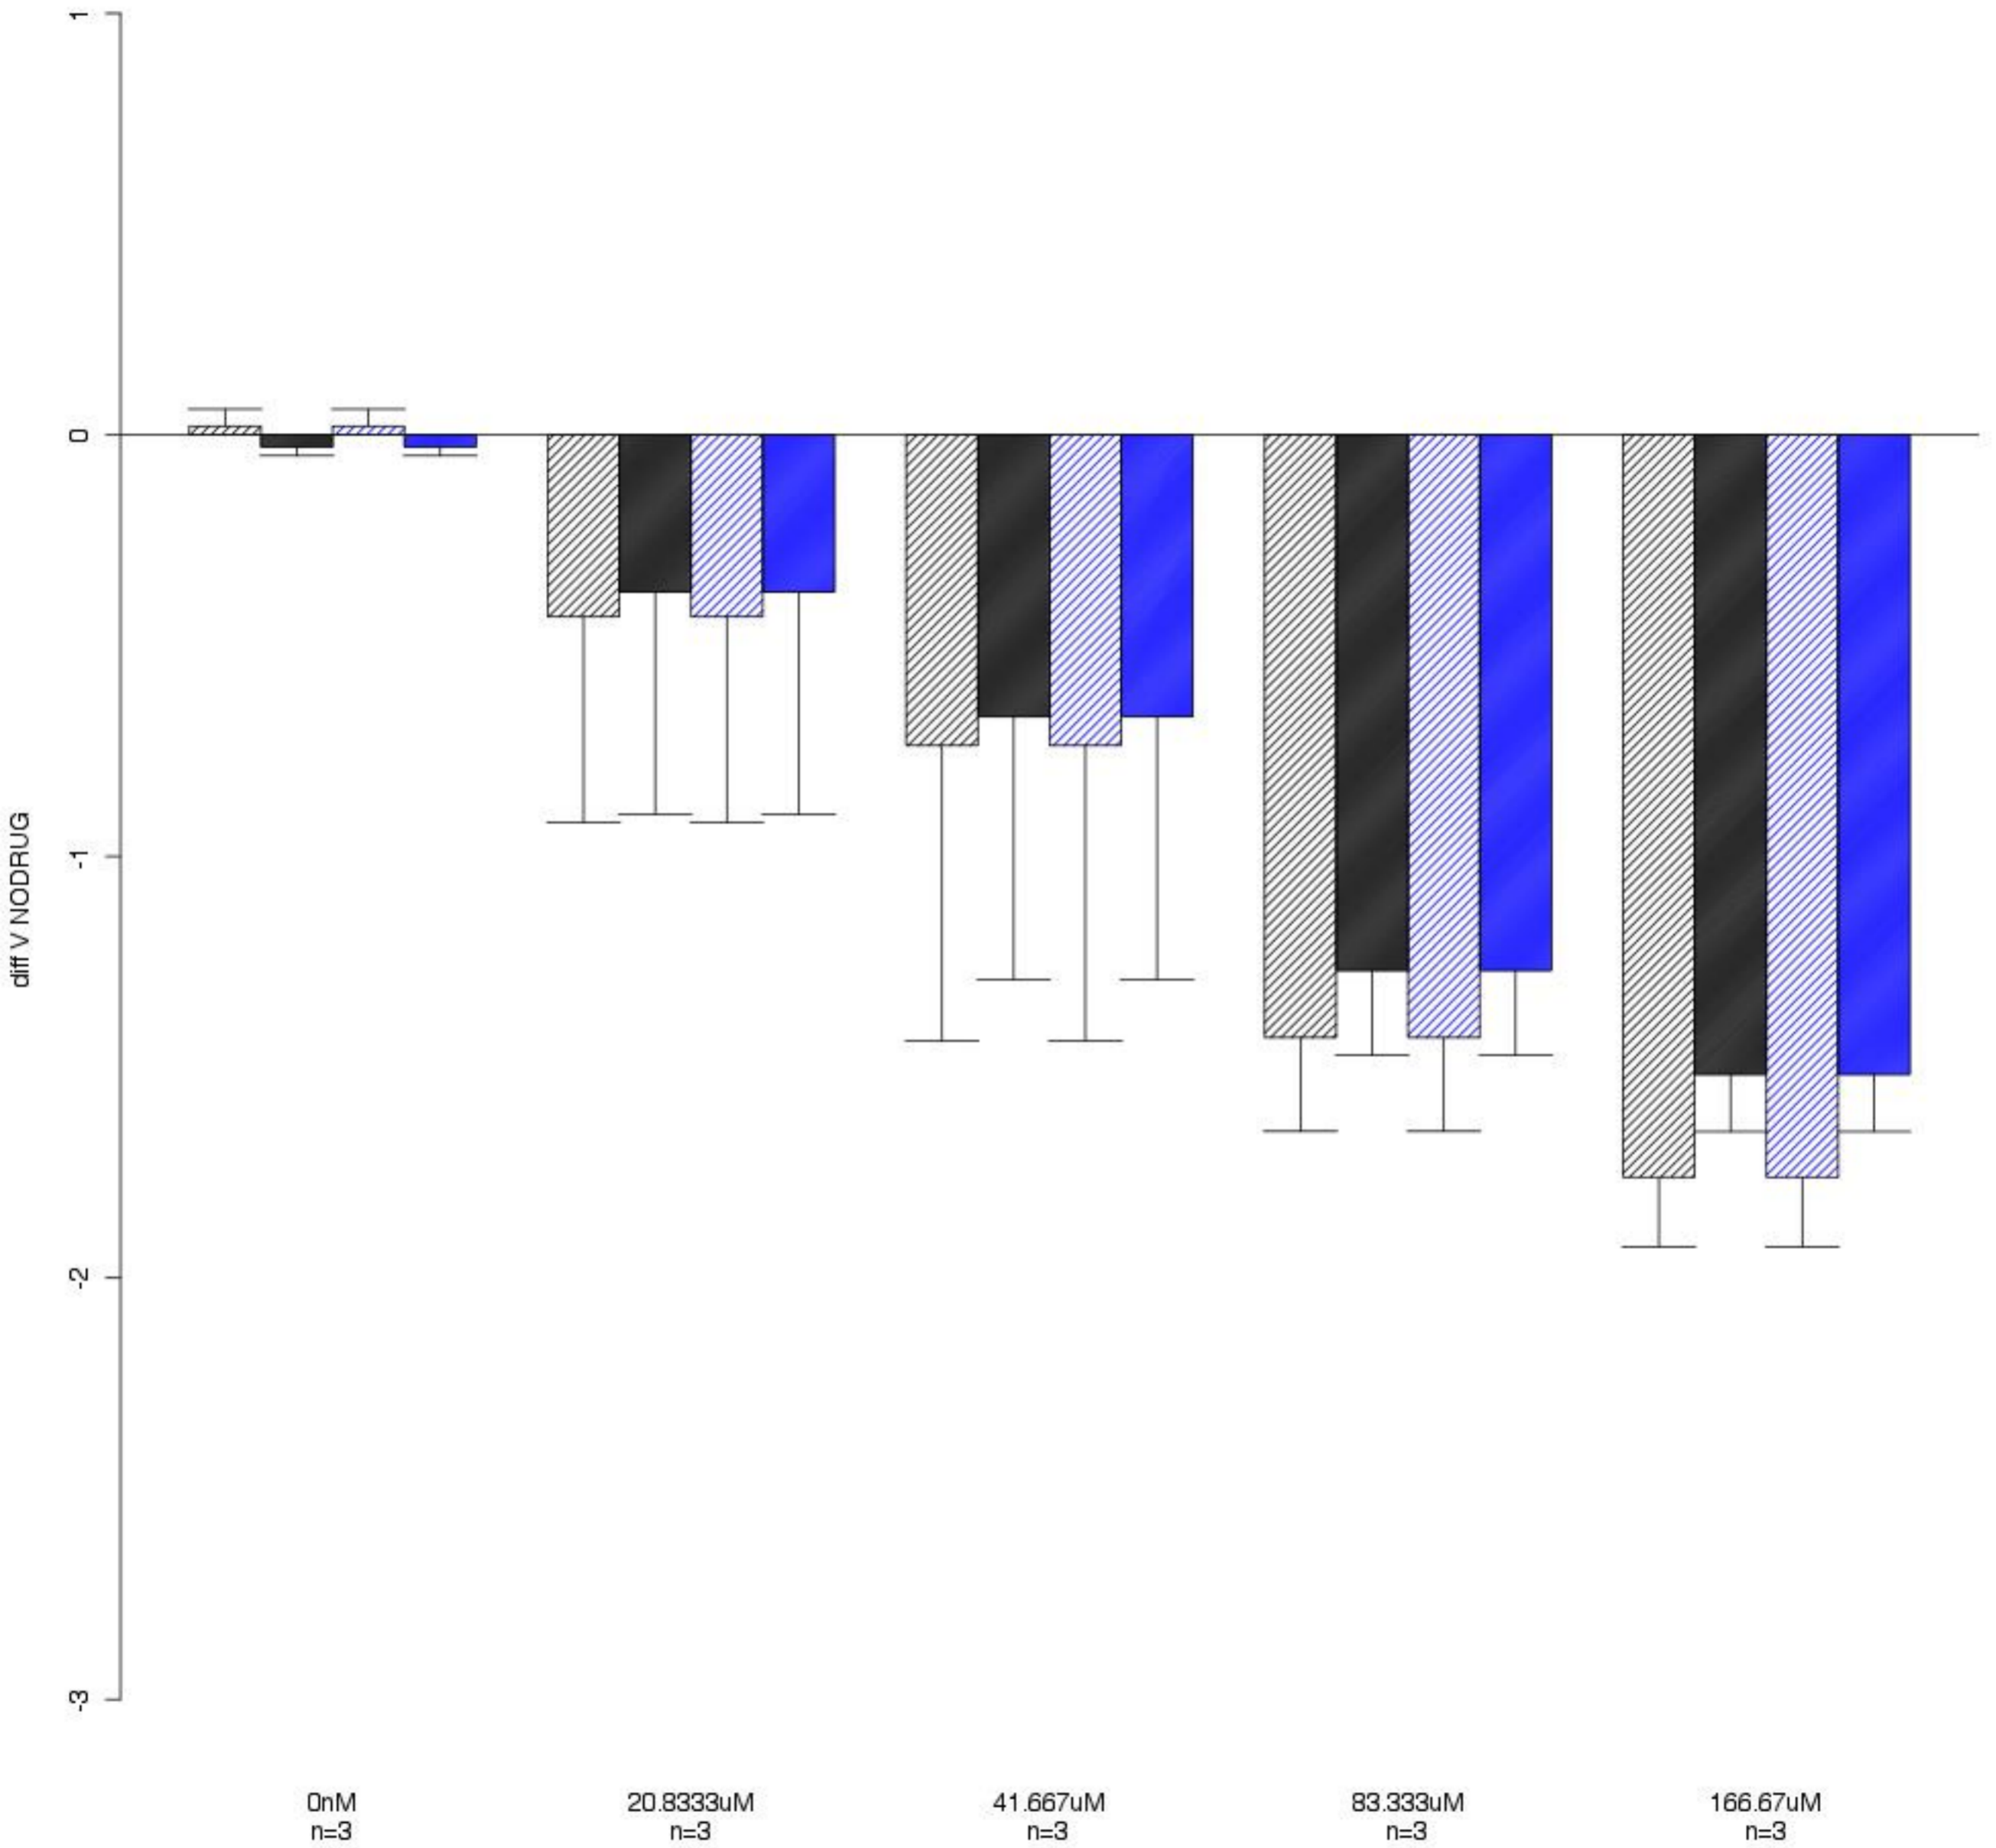

HEK293\_Pyrodach-4  
RHOF2

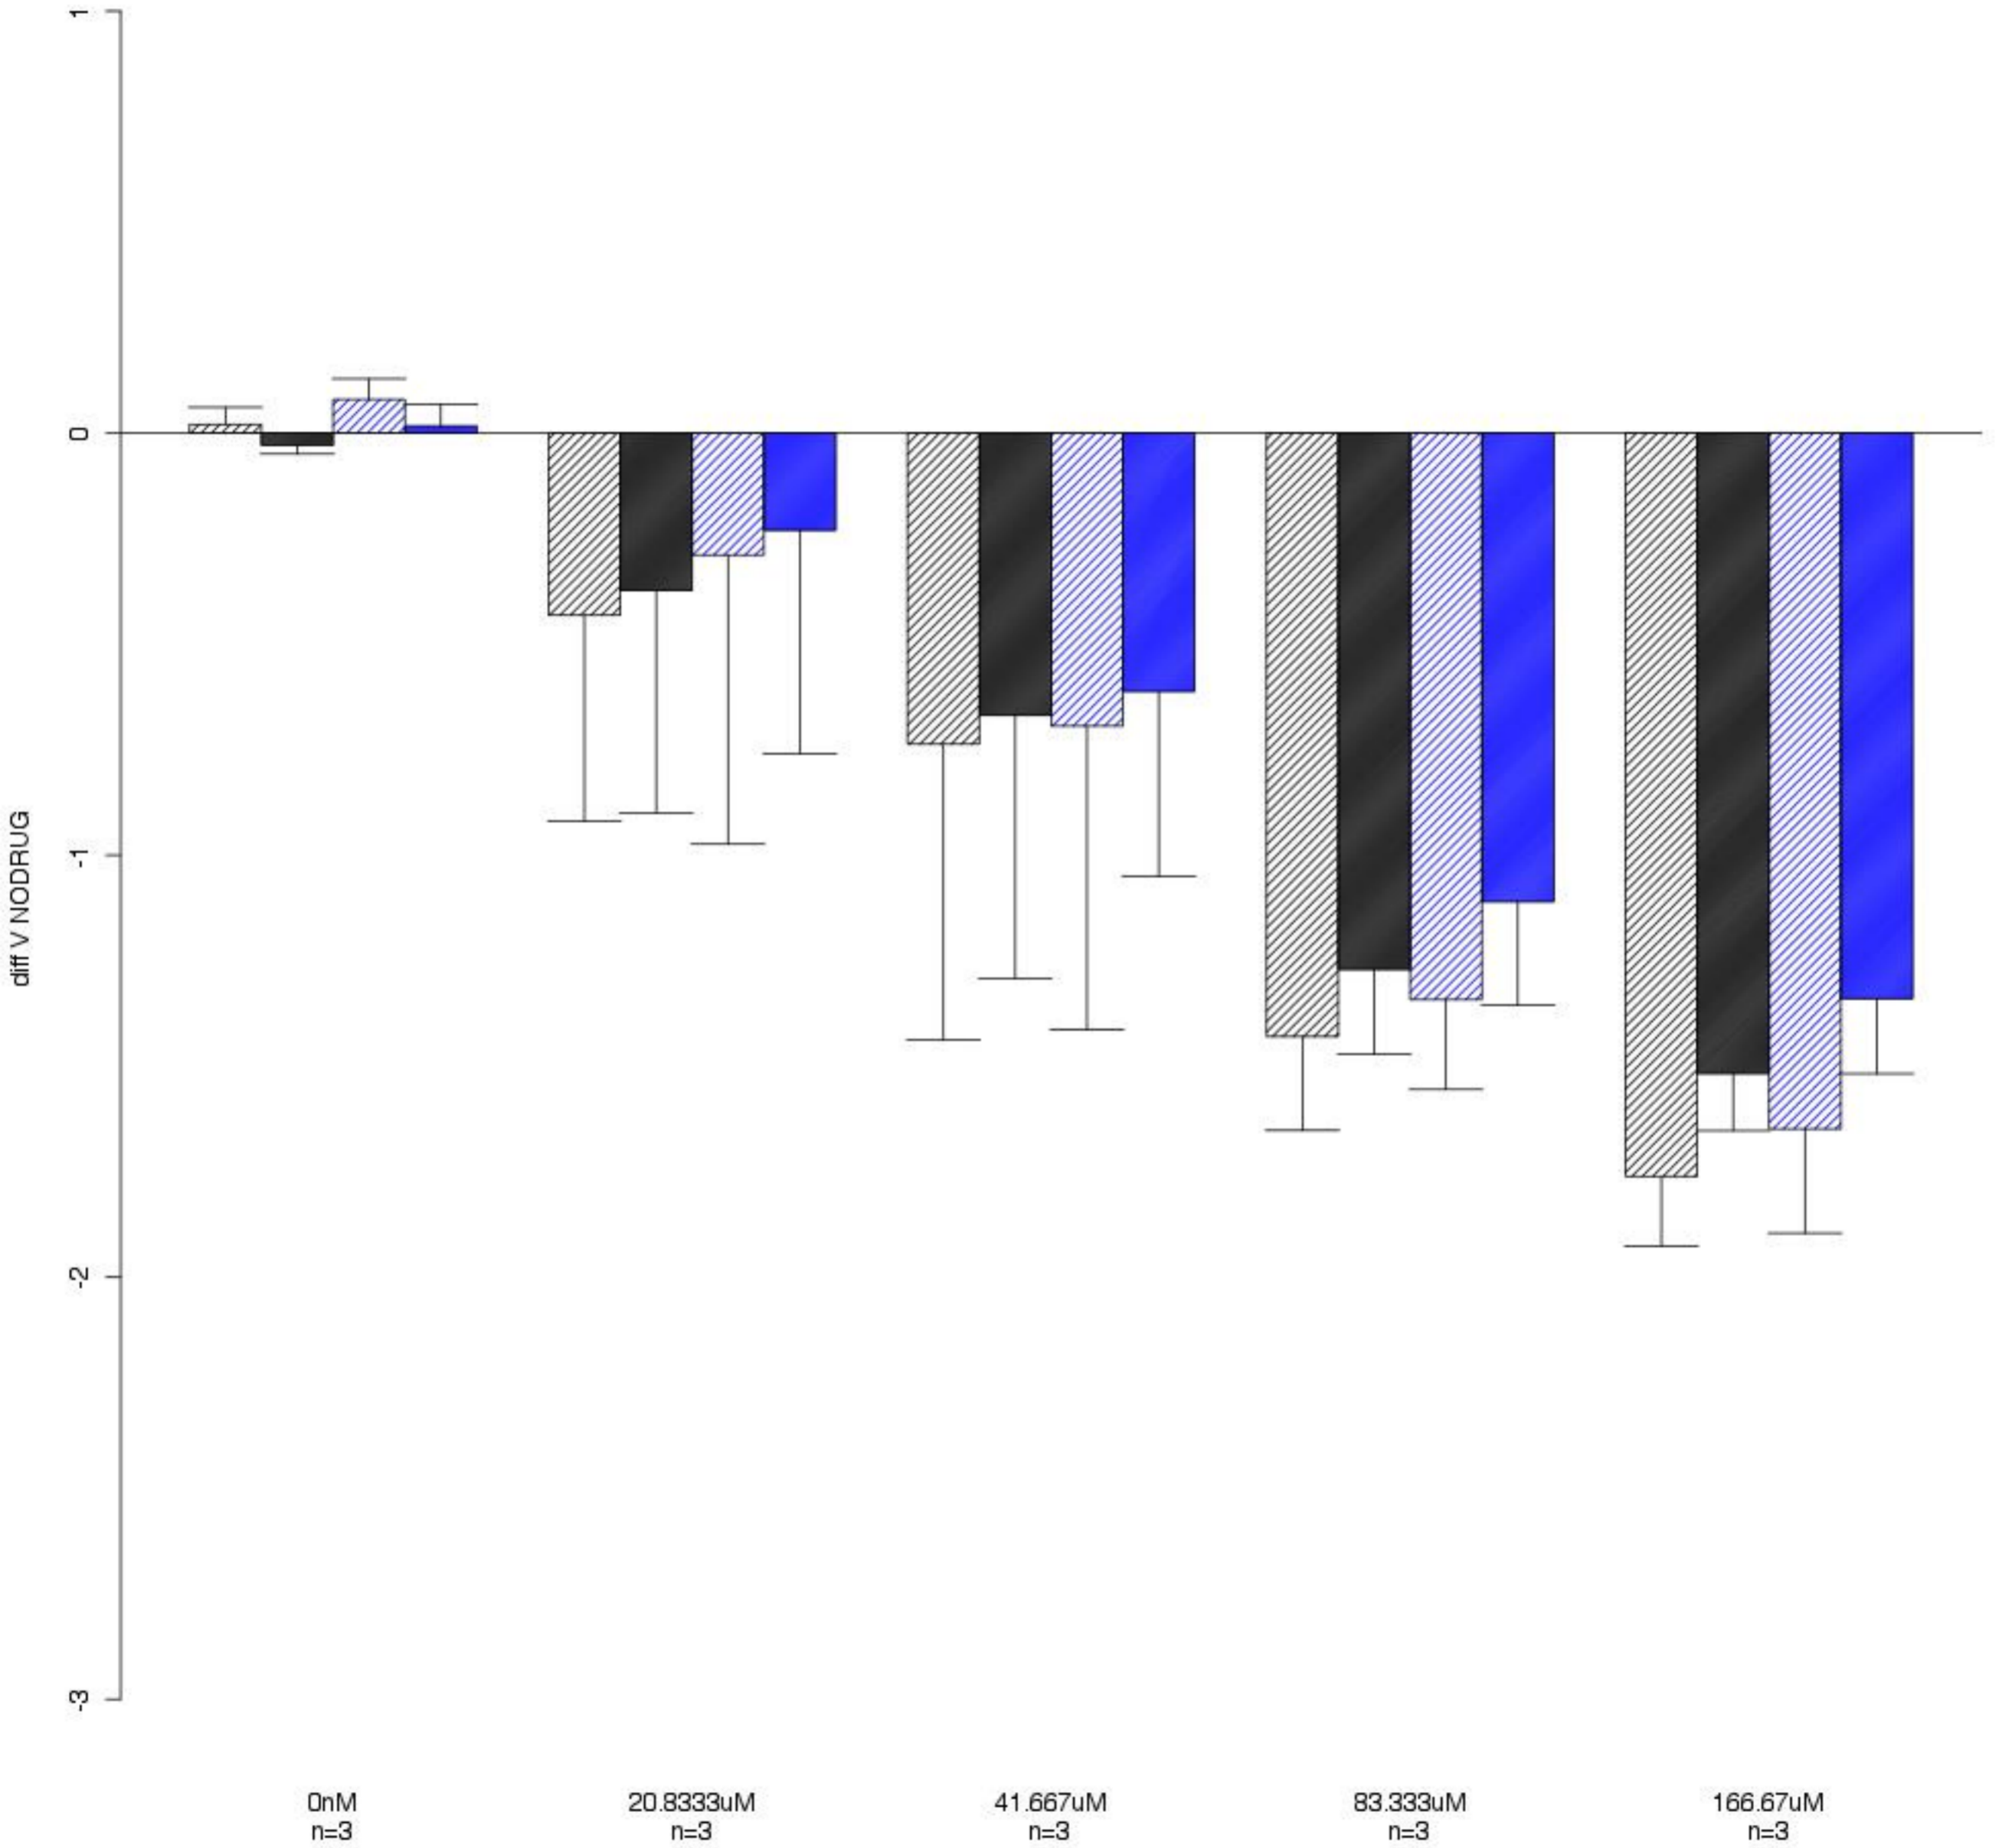

Supplement: gm549-S8.pdf [file gm549-S8.pdf]
